# Supplementary material
Source: PubMed Central journal article supplement (PMC10841640)

**Supplemental Table 1. Patient Characteristics (N=101), related to Fig. 1, Fig. 3, Fig. 4**

|                                           | <b>N (%)</b> | <b>Median (IQR<sup>a</sup>)</b> |
|-------------------------------------------|--------------|---------------------------------|
| <b>Institution</b>                        |              |                                 |
| LBJ <sup>b</sup>                          | 24 (23.8)    |                                 |
| MDACC <sup>c</sup>                        | 77 (76.2)    |                                 |
| <b>Age (years)</b>                        |              | 45 (38 – 52)                    |
| <b>Race</b>                               |              |                                 |
| Asian/Black/Other                         | 13 (12.9)    |                                 |
| Hispanic                                  | 45 (44.5)    |                                 |
| White                                     | 43 (42.6)    |                                 |
| <b>BMI<sup>d</sup> (kg/m<sup>2</sup>)</b> |              | 28.8 (25 – 33.4)                |
| <b>Smoking Status</b>                     |              |                                 |
| Never                                     | 62 (61.4)    |                                 |
| Former                                    | 29 (28.7)    |                                 |
| Current                                   | 10 (9.9)     |                                 |
| <b>Histology</b>                          |              |                                 |
| Non-squamous <sup>e</sup>                 | 21 (20.8)    |                                 |
| Squamous                                  | 80 (79.2)    |                                 |
| <b>LVSI</b>                               |              |                                 |
| No                                        | 22 (21.8)    |                                 |
| Yes                                       | 7 (6.9)      |                                 |
| Unknown                                   | 72 (71.3)    |                                 |
| <b>FIGO 2009 Stage<sup>f</sup></b>        |              |                                 |
| II-II                                     | 54 (53.5)    |                                 |
| III-IV                                    | 47 (46.5)    |                                 |
| <b>Grade</b>                              |              |                                 |
| Other/Unknown                             | 18 (17.8)    |                                 |
| 1                                         | 7 (6.9)      |                                 |
| 2                                         | 41 (40.6)    |                                 |
| 3                                         | 35 (34.7)    |                                 |
| <b>HPV Type</b>                           |              |                                 |
| HPV 16/18                                 | 63 (62.4)    |                                 |
| Negative/Other                            | 33 (32.7)    |                                 |
| Unknown                                   | 5 (4.9)      |                                 |
| <b>Cisplatin Cycles</b>                   |              | 5 (5 – 6)                       |
| <b>Radiation Dose (Gy)</b>                |              | 8834 (8169 – 9299)              |
| <b>Antibiotic Use<sup>g</sup></b>         |              |                                 |
| No                                        | 62 (61.4)    |                                 |
| Yes                                       | 38 (37.6)    |                                 |
| Unknown                                   | 1 (1.0)      |                                 |
| <b>Nodal Status</b>                       |              |                                 |
| Negative/Unknown                          | 39 (38.6)    |                                 |
| Positive                                  | 62 (61.4)    |                                 |
| <b>Tumor Dimension (cm)</b>               |              | 5.3 (4 – 6.5)                   |

<sup>a</sup> Interquartile range. <sup>b</sup> Lyndon B. Johnson Hospital, Harris Health System, Houston TX. <sup>c</sup> The University of Texas M.D. Anderson Cancer Center, Houston TX. <sup>d</sup> Body mass index. <sup>e</sup> Adenocarcinoma and adenosquamous carcinoma. <sup>f</sup> The International Federation of Gynecology and Obstetrics. <sup>g</sup> Antibiotic use within 30 days of baseline swab collection extracted from inpatient and outpatient pharmacy and electronic medical record data, antifungals not included.

**Supplemental Table 2. Availability of tumor swab samples for 16S sequencing at all timepoints, related to all Figures.**

| <b>Patient</b> | <b>Baseline</b> | <b>Week 1</b> | <b>Week 3</b> | <b>Week 5</b> | <b>Follow-up</b> |
|----------------|-----------------|---------------|---------------|---------------|------------------|
| 1              | ✓               | ✓             | ✓             | X             | ✓                |
| 2              | ✓               | ✓             | ✓             | ✓             | X                |
| 3              | ✓               | ✓             | ✓             | ✓             | X                |
| 4              | ✓               | ✓             | ✓             | ✓             | X                |
| 5              | ✓               | ✓             | ✓             | ✓             | X                |
| 6              | ✓               | X             | X             | X             | X                |
| 7              | ✓               | ✓             | ✓             | ✓             | X                |
| 8              | ✓               | ✓             | ✓             | ✓             | X                |
| 9              | ✓               | ✓             | X             | ✓             | X                |
| 10             | ✓               | X             | X             | ✓             | X                |
| 11             | ✓               | X             | X             | X             | X                |
| 12             | ✓               | ✓             | ✓             | ✓             | X                |
| 13             | ✓               | ✓             | ✓             | ✓             | X                |
| 14             | ✓               | ✓             | ✓             | ✓             | X                |
| 15             | ✓               | ✓             | ✓             | ✓             | X                |
| 16             | ✓               | ✓             | ✓             | ✓             | X                |
| 17             | ✓               | ✓             | ✓             | ✓             | X                |
| 18             | ✓               | ✓             | ✓             | ✓             | X                |
| 19             | ✓               | ✓             | X             | X             | X                |
| 20             | ✓               | ✓             | ✓             | ✓             | X                |
| 21             | ✓               | X             | X             | X             | X                |
| 22             | ✓               | ✓             | ✓             | ✓             | X                |
| 23             | ✓               | ✓             | X             | ✓             | X                |
| 24             | ✓               | ✓             | ✓             | ✓             | X                |
| 25             | ✓               | X             | ✓             | ✓             | X                |
| 26             | ✓               | X             | ✓             | ✓             | X                |
| 27             | ✓               | X             | X             | ✓             | X                |
| 28             | ✓               | ✓             | ✓             | ✓             | X                |
| 29             | ✓               | ✓             | ✓             | ✓             | X                |
| 30             | ✓               | X             | ✓             | ✓             | X                |
| 31             | ✓               | ✓             | ✓             | X             | ✓                |
| 32             | ✓               | ✓             | ✓             | ✓             | ✓                |
| 33             | ✓               | ✓             | X             | ✓             | ✓                |
| 34             | ✓               | ✓             | ✓             | ✓             | ✓                |
| 35             | ✓               | ✓             | ✓             | ✓             | ✓                |
| 36             | ✓               | ✓             | X             | X             | ✓                |
| 37             | ✓               | ✓             | ✓             | ✓             | ✓                |
| 38             | ✓               | X             | X             | ✓             | X                |
| 39             | X               | ✓             | ✓             | ✓             | X                |

|    |   |   |   |   |   |
|----|---|---|---|---|---|
| 40 | ✓ | ✓ | ✓ | X | X |
| 41 | X | ✓ | X | ✓ | X |
| 42 | ✓ | ✓ | ✓ | ✓ | ✓ |
| 43 | ✓ | ✓ | ✓ | ✓ | ✓ |
| 44 | ✓ | X | ✓ | ✓ | X |
| 45 | ✓ | ✓ | ✓ | ✓ | ✓ |
| 46 | ✓ | ✓ | ✓ | ✓ | ✓ |
| 47 | ✓ | ✓ | ✓ | ✓ | ✓ |
| 48 | ✓ | X | X | X | ✓ |
| 49 | ✓ | X | X | ✓ | X |
| 50 | X | ✓ | ✓ | ✓ | ✓ |
| 51 | ✓ | X | X | ✓ | ✓ |
| 52 | ✓ | ✓ | ✓ | ✓ | X |
| 53 | ✓ | ✓ | ✓ | ✓ | X |
| 54 | ✓ | ✓ | ✓ | ✓ | X |
| 55 | ✓ | X | X | X | X |
| 56 | ✓ | ✓ | ✓ | ✓ | X |
| 57 | X | ✓ | ✓ | ✓ | X |
| 58 | ✓ | ✓ | ✓ | ✓ | ✓ |
| 59 | ✓ | ✓ | ✓ | ✓ | ✓ |
| 60 | ✓ | ✓ | ✓ | ✓ | ✓ |
| 61 | ✓ | ✓ | ✓ | X | ✓ |
| 62 | ✓ | X | X | ✓ | ✓ |
| 63 | ✓ | ✓ | X | X | ✓ |
| 64 | ✓ | ✓ | X | X | X |
| 65 | ✓ | X | ✓ | ✓ | X |
| 66 | ✓ | X | X | ✓ | X |
| 67 | ✓ | ✓ | X | ✓ | X |
| 68 | ✓ | ✓ | ✓ | ✓ | X |
| 69 | ✓ | ✓ | X | X | X |
| 70 | ✓ | X | X | X | X |
| 71 | ✓ | ✓ | ✓ | X | X |
| 72 | ✓ | ✓ | ✓ | ✓ | X |
| 73 | ✓ | X | X | ✓ | X |
| 74 | ✓ | X | X | X | X |
| 75 | ✓ | X | X | X | X |
| 76 | ✓ | X | X | X | X |
| 77 | ✓ | X | ✓ | ✓ | X |
| 78 | ✓ | X | ✓ | ✓ | X |
| 79 | ✓ | X | X | X | X |
| 80 | ✓ | X | ✓ | ✓ | X |
| 81 | ✓ | X | ✓ | X | ✓ |

|     |   |   |   |   |   |
|-----|---|---|---|---|---|
| 82  | ✓ | ✓ | ✓ | ✓ | ✓ |
| 83  | ✓ | ✓ | ✓ | ✓ | ✓ |
| 84  | ✓ | ✓ | ✓ | ✓ | X |
| 85  | ✓ | ✓ | ✓ | ✓ | ✓ |
| 86  | ✓ | X | X | ✓ | X |
| 87  | ✓ | ✓ | ✓ | X | ✓ |
| 88  | ✓ | X | ✓ | ✓ | X |
| 89  | ✓ | X | X | ✓ | X |
| 90  | ✓ | X | X | ✓ | X |
| 91  | ✓ | ✓ | X | ✓ | ✓ |
| 92  | ✓ | ✓ | ✓ | ✓ | ✓ |
| 93  | ✓ | X | ✓ | ✓ | X |
| 94  | ✓ | ✓ | X | ✓ | X |
| 95  | ✓ | ✓ | ✓ | ✓ | X |
| 96  | ✓ | X | X | ✓ | X |
| 97  | X | ✓ | ✓ | ✓ | X |
| 98  | ✓ | ✓ | ✓ | ✓ | X |
| 99  | ✓ | ✓ | ✓ | ✓ | ✓ |
| 100 | ✓ | ✓ | ✓ | ✓ | X |
| 101 | ✓ | ✓ | ✓ | ✓ | X |

---

**Supplemental Table 3. Univariate Cox proportional hazard survival analysis for other baseline tumor and gut microbiome metrics in all patients with baseline samples available (N=96), related to Figures 1 and 2.**

|                                     | Type  | Recurrence-Free Survival  |              | Overall Survival         |                         |
|-------------------------------------|-------|---------------------------|--------------|--------------------------|-------------------------|
|                                     |       | HR (95%CI)                | pval         | HR (95%CI)               | pval                    |
| <b>Faith's PD<sup>a</sup></b>       | Tumor | 0.97 (0.77-1.22)          | 0.80         | 0.97 (0.70-0.36)         | 0.88                    |
| <b>Fisher's Alpha</b>               | Tumor | 1.00 (0.92-1.09)          | 0.99         | 1.00 (1.00-1.00)         | 1                       |
| <b>Observed Features</b>            | Tumor | 1.00 (0.98-1.01)          | 0.73         | 1.00 (0.98-1.02)         | 0.90                    |
| <b>Pielou's Evenness</b>            | Tumor | 0.80 (0.13-4.96)          | 0.81         | 0.77 (0.06-10.54)        | 0.85                    |
| <b>Shannon Diversity</b>            | Tumor | 0.98 (0.76-1.28)          | 0.91         | 0.99 (0.68-1.46)         | 0.98                    |
| <b>Simpson's Evenness</b>           | Tumor | 0.69 (0.04-13.46)         | 0.81         | 1.88 (0.04-85.00)        | 0.75                    |
| <b>Simpson Diversity</b>            | Tumor | 1.00 (0.22-4.50)          | 1.00         | 1.03 (0.12-9.11)         | 0.98                    |
| <b>Faith's PD</b>                   | Gut   | 1.01 (0.89-1.15)          | 0.88         | 0.89 (0.72-1.09)         | 0.26                    |
| <b>Fisher's Alpha</b>               | Gut   | 1.00 (0.96-1.04)          | 0.95         | 0.98 (0.91-1.05)         | 0.57                    |
| <b>Observed Features</b>            | Gut   | 1.00 (0.99-1.01)          | 0.72         | 1.00 (0.98-1.01)         | 0.47                    |
| <b>Pielou's Evenness</b>            | Gut   | 0.04 (0.0004-4.21)        | 0.18         | 0.001 (1.83E-06 -0.61)   | <b>0.03<sup>c</sup></b> |
| <b>Shannon Diversity</b>            | Gut   | 0.80 (0.52-1.24)          | 0.32         | 0.57 (0.29-1.10)         | 0.09                    |
| <b>Simpson's Evenness</b>           | Gut   | 0.02 (2.81E-06 -161.93)   | 0.40         | 2.3E-07 (7.5E-14 -0.73)  | <b>0.04</b>             |
| <b>Simpson Diversity</b>            | Gut   | 0.003 (1.01E-05 -0.99)    | <b>0.049</b> | 6.5E-05 (2.87E-08 -0.15) | <b>0.01</b>             |
| <b>Prevotella</b>                   | Tumor | 1.04 (0.11-9.89)          | 0.97         | 1.43 (0.06-36.54)        | 0.83                    |
| <b>Porphyromonas</b>                | Tumor | 1.06 (0.04-29.93)         | 0.97         | 0.33 (0.001-95.83)       | 0.70                    |
| <b>Gammaproteobacteria</b>          | Tumor | 2.24E-05 (5.4E-12-92.32)  | 0.17         | 0.80 (0.001-949.69)      | 0.95                    |
| <b>Actinobacteria</b>               | Tumor | 0.03 (0.00-1.82)          | 0.09         | 1.47 (0.05-39.84)        | 0.82                    |
| <b>Proteobacteria</b>               | Tumor | 0.003 (1.6E-06 -6.94)     | 0.14         | 0.15 (0.0001-196.16)     | 0.61                    |
| <b><i>Gardnerella vaginalis</i></b> | Tumor | 0.19 (0.01-5.68)          | 0.34         | 1.42 (0.05-40.17)        | 0.84                    |
| <b><i>Prevotella bivia</i></b>      | Tumor | 0.76 (0.04-16.09)         | 0.86         | 0.01 (5.87E-07 -110.07)  | 0.32                    |
| <b><i>Atopobium vaginae</i></b>     | Tumor | 0.01 (1.65E-08 -59968.67) | 0.49         | 308.96 (0.002-5.68E07)   | 0.35                    |
| <b><i>Escherichia shigella</i></b>  | Gut   | 23.06 (0.12-4272.69)      | 0.24         | 10.24 (0.01-12209.87)    | 0.52                    |

<sup>a</sup>Phylogenetic diversity <sup>b</sup>bold text denotes p value < 0.05.

**Supplemental Figure 1. Other tumor microbiome features in pilot cohort are not associated with response or survival, related to Figure 1.**

- A. Kaplan-Meier curves for recurrence free survival stratified by baseline presence (N=38) or absence (N=3) of tumoral Proteobacteria in the initial cohort. Log-rank p-value reported.
- B. Kaplan-Meier curves for recurrence free survival stratified by baseline presence (N=23) or absence (N=18) of tumoral Gammaproteobacteria in the initial cohort. Log-rank p-value reported.
- C. Kaplan-Meier curves for recurrence free survival stratified by baseline presence (N=36) or absence (N=5) of tumoral Actinobacteria in the initial cohort. Log-rank p-value reported.
- D. 16S Baseline tumor Simpson Diversity Index by response (Non-responders [N=12] vs. Responders [N=31]) in the initial cohort. Comparison was made using a Wilcoxon Rank Sum test.
- E. 16S Baseline tumor Pielou's Evenness Index by response (Non-responders [N=12] vs. Responders [N=31]) in the initial cohort. Comparison was made using a Wilcoxon Rank Sum test.
- F. 16S Baseline tumor Observed Features by response (Non-responders [N=12] vs. Responders [N=31]) in the initial cohort. Comparison was made using a Wilcoxon Rank Sum test.
- G. 16S Baseline tumor Faith's Phylogenetic Diversity (PD) by response (Non-responders [N=12] vs. Responders [N=31]) in the initial cohort. Comparison was made using a Wilcoxon Rank Sum test.
- H. 16S Baseline tumor Fisher's Alpha by response (Non-responders [N=12] vs. Responders [N=31]) in the initial cohort. Comparison was made using a Wilcoxon Rank Sum test.
- I. Forest plot of a univariate cox proportional hazard model for recurrence-free survival with 16S baseline tumor Simpson Diversity Index (N=41) in the initial cohort.
- J. Forest plot of a univariate cox proportional hazard model for recurrence-free survival with 16S baseline tumor Pielou's Evenness Index (N=41) in the initial cohort.
- K. Forest plot of a univariate cox proportional hazard model for recurrence-free survival with 16S baseline tumor Observed Features (N=41) in the initial cohort.
- L. Forest plot of a univariate cox proportional hazard model for recurrence-free survival with 16S baseline tumor Faith's Phylogenetic Diversity (PD) (N=41) in the initial cohort.
- M. Forest plot of a univariate cox proportional hazard model for recurrence-free survival with 16S baseline Fisher's Alpha (N=41) in the initial cohort.

**A**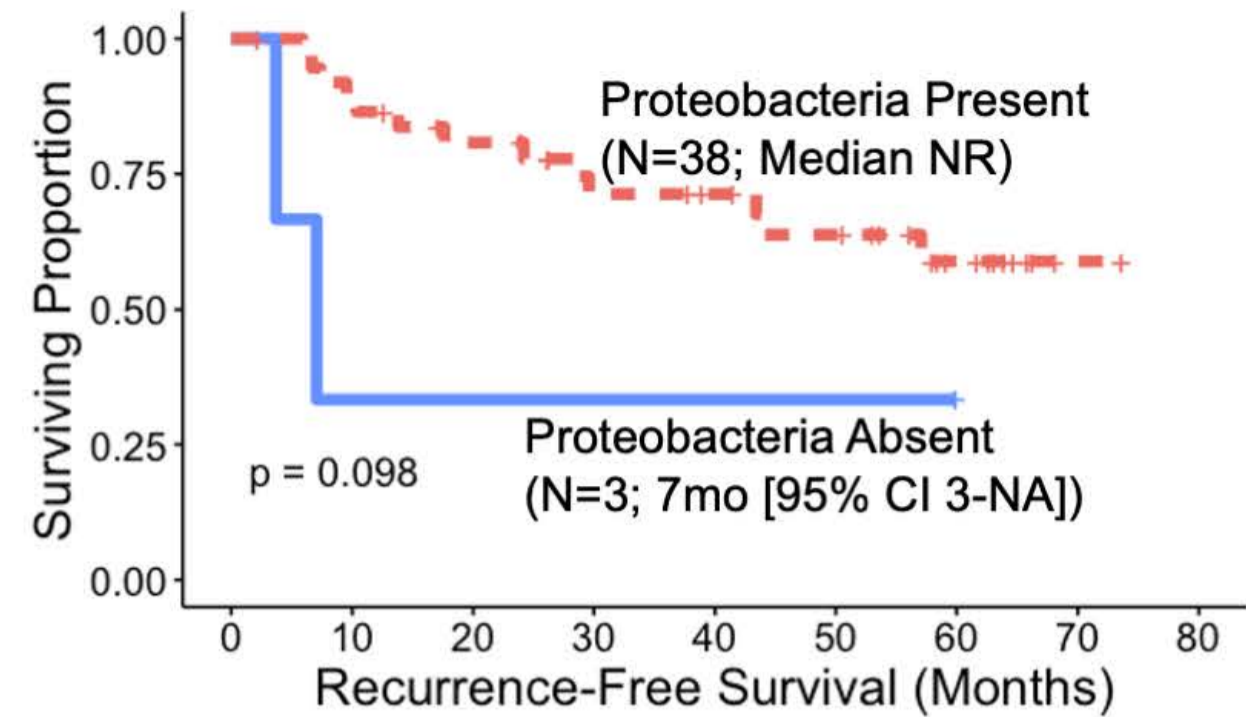**B**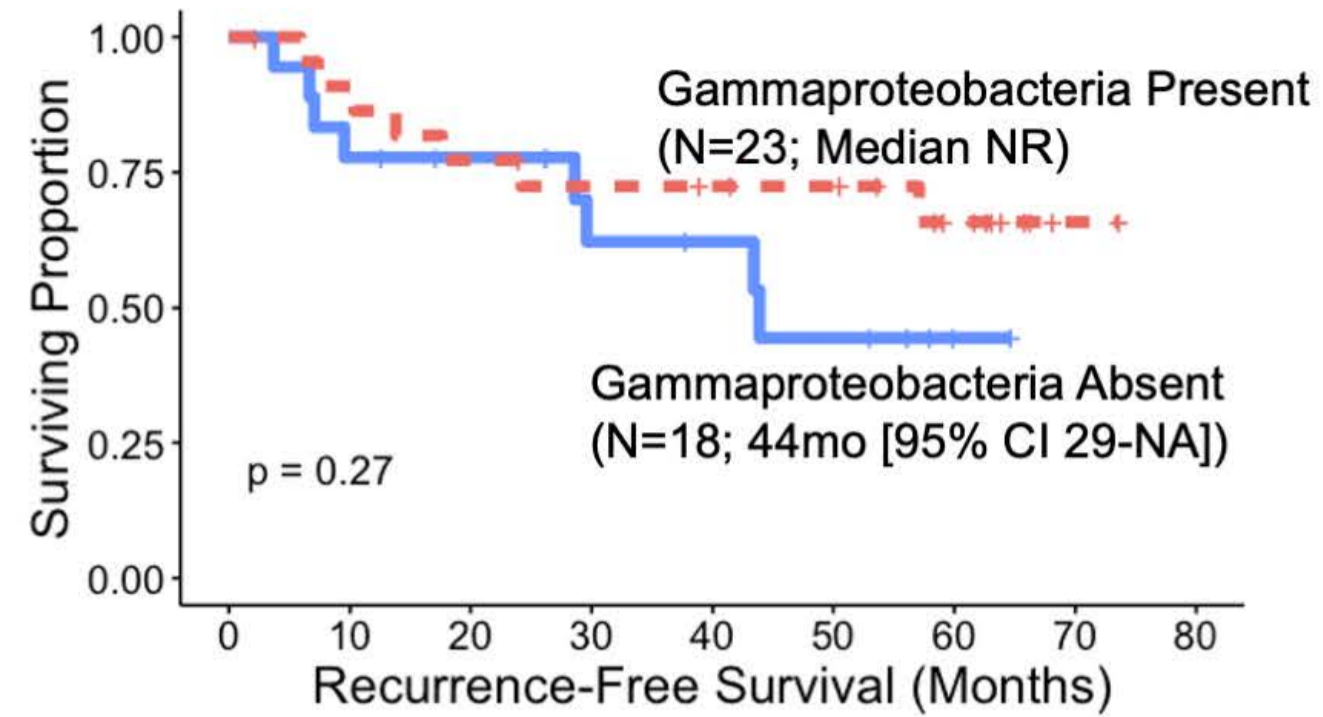**C**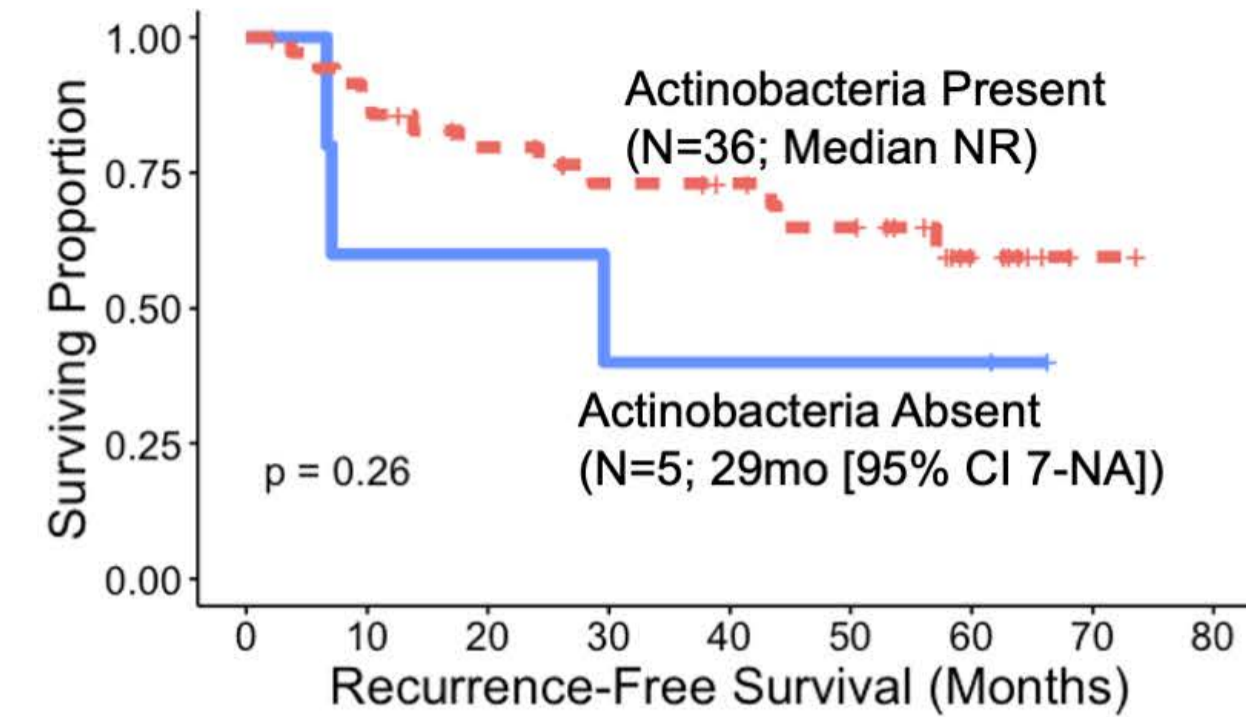**D**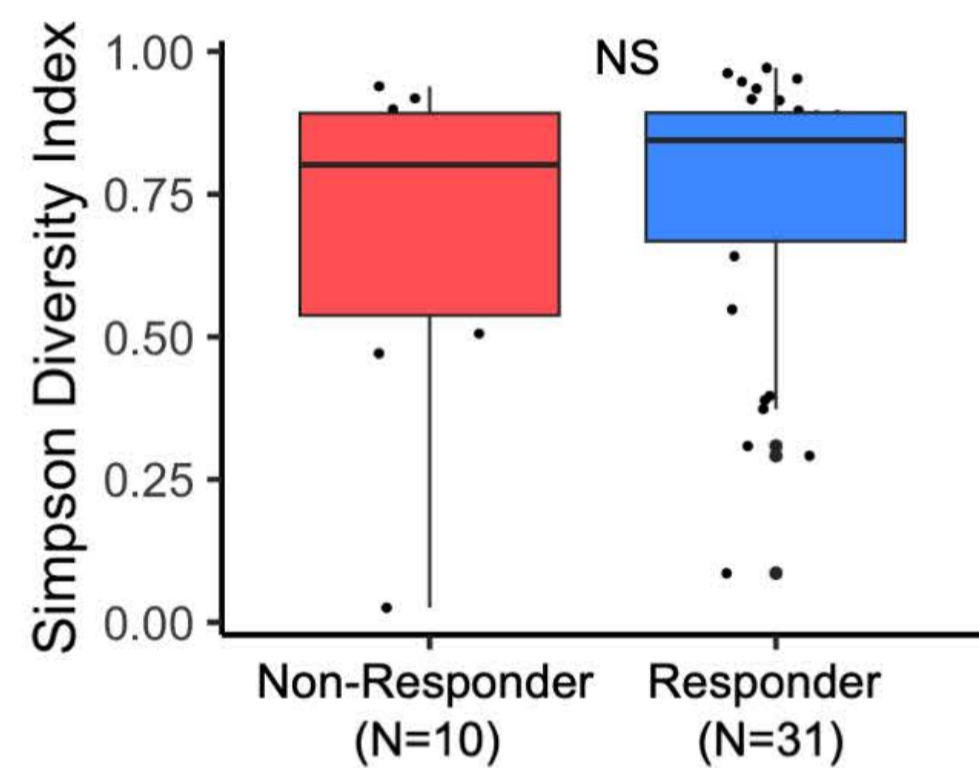**E**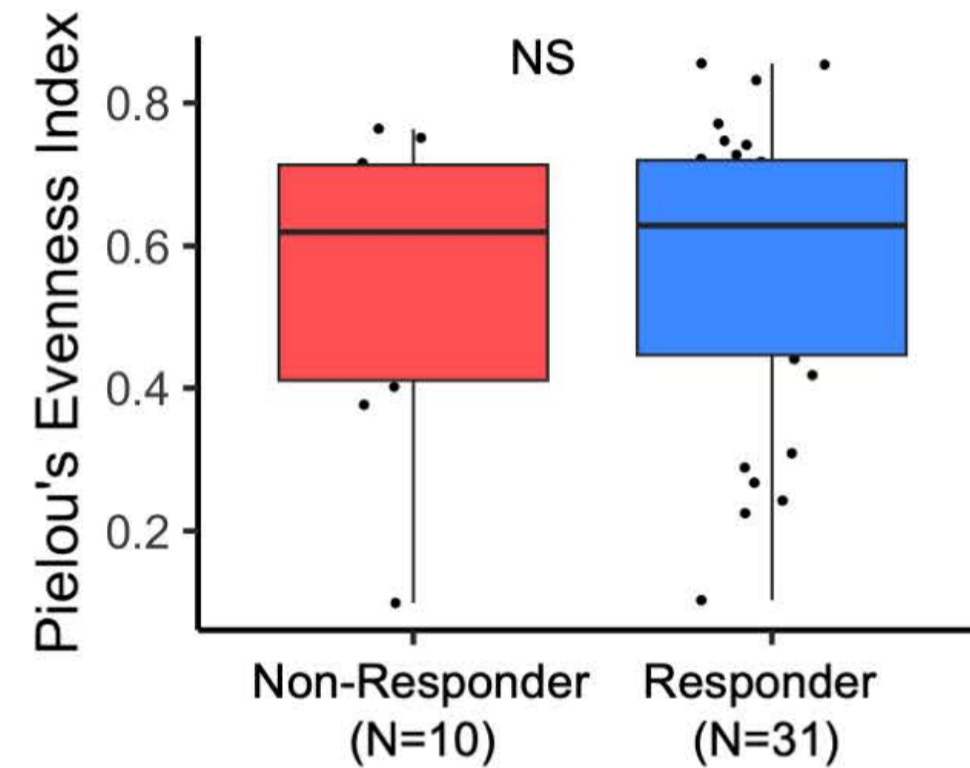**F**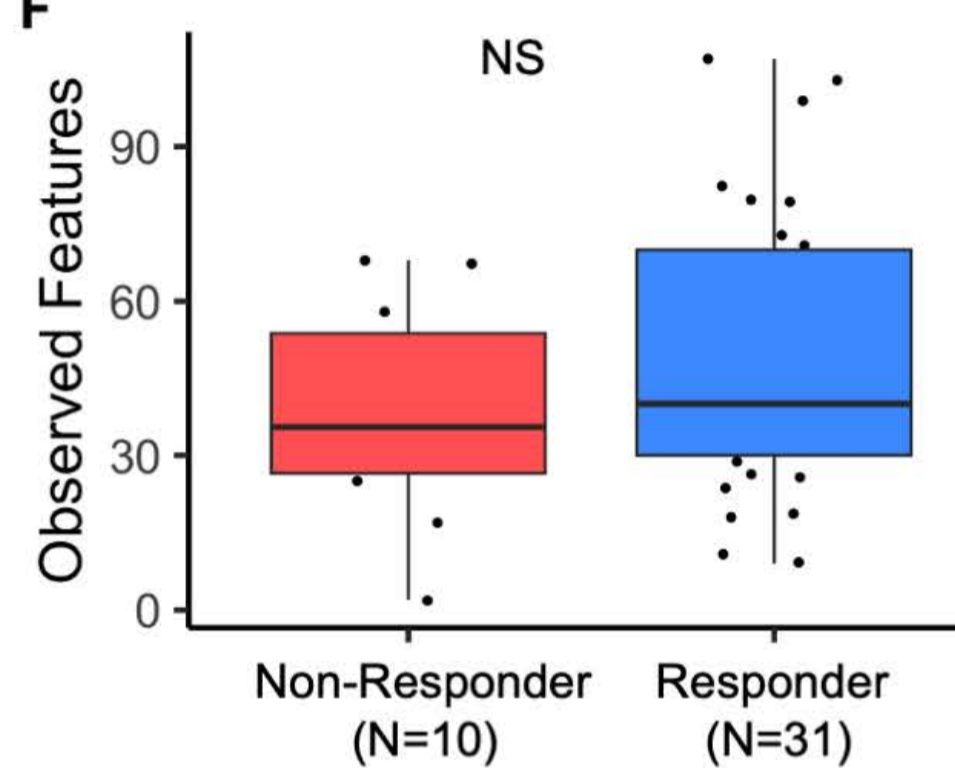**G**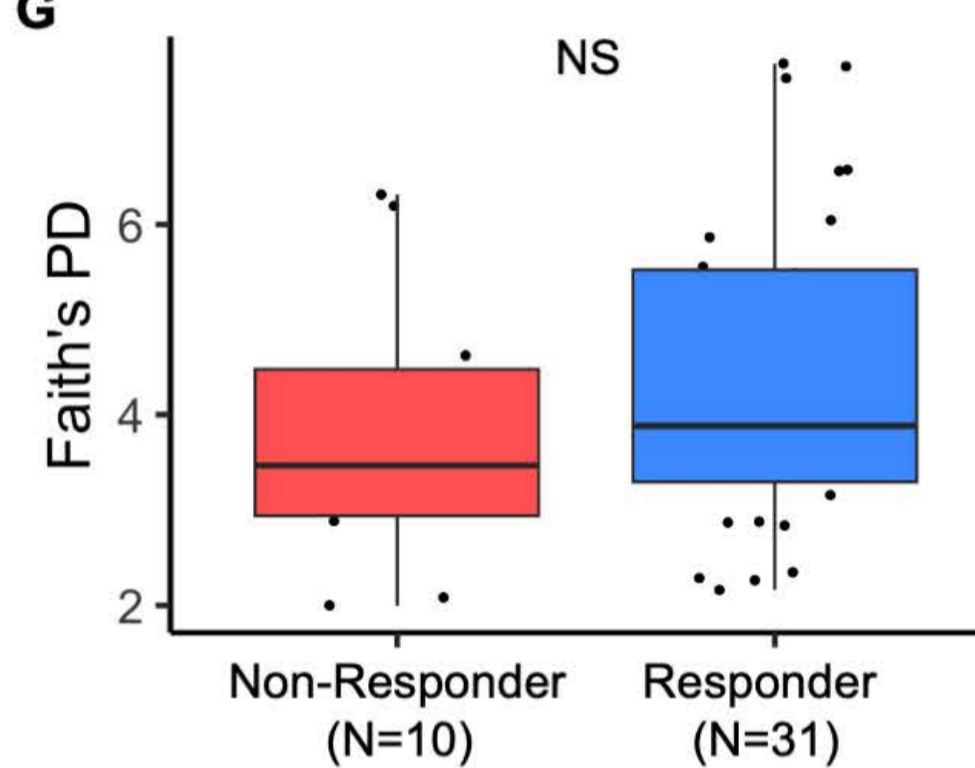**H**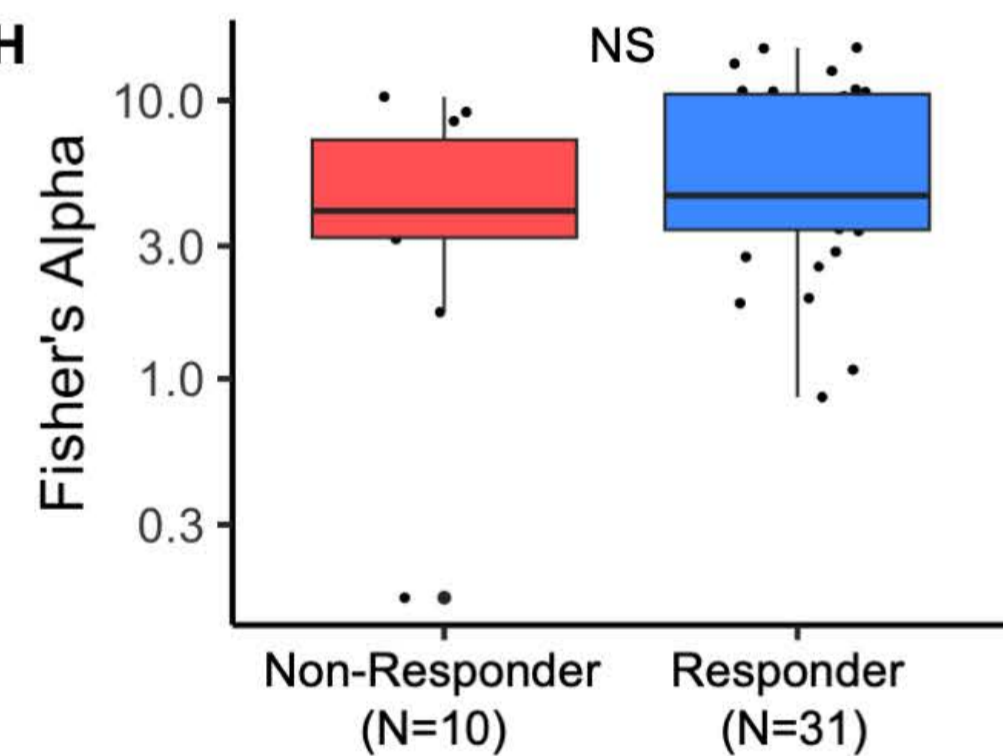**I**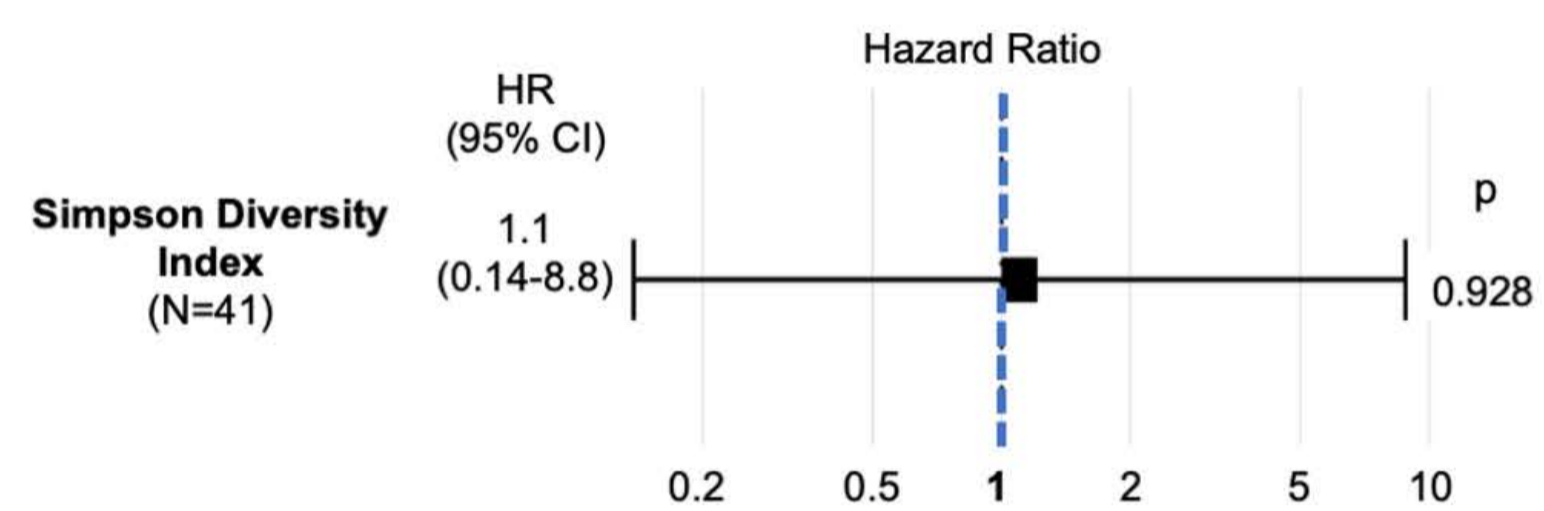**J**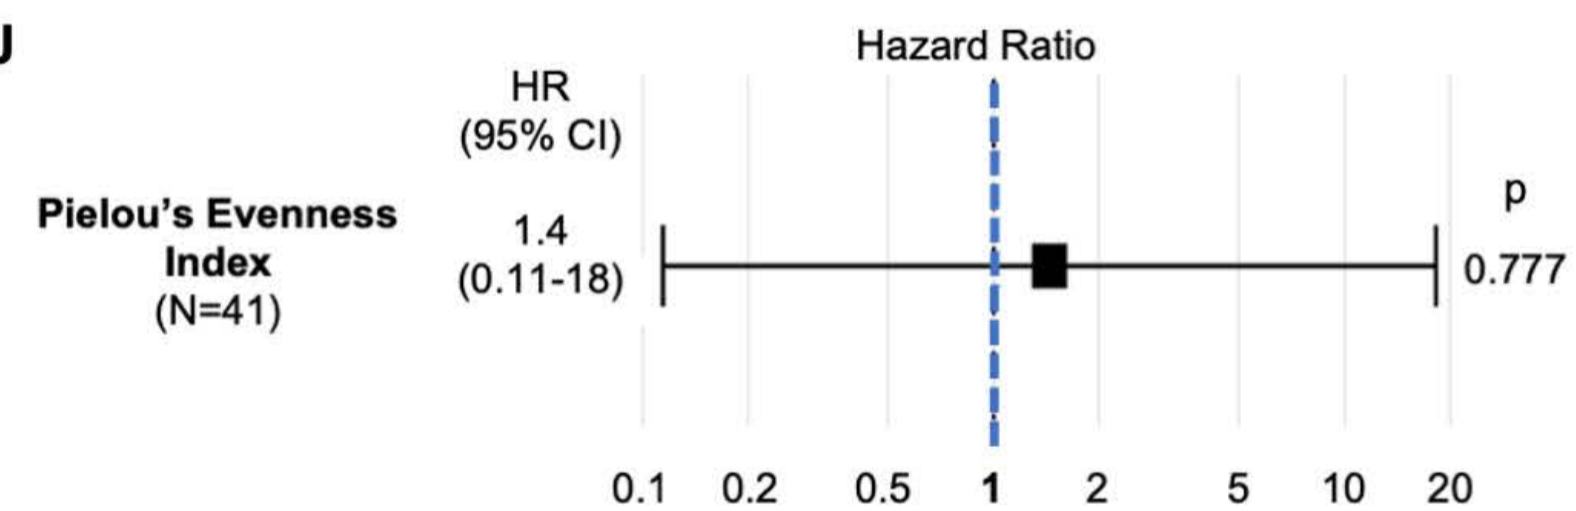**K**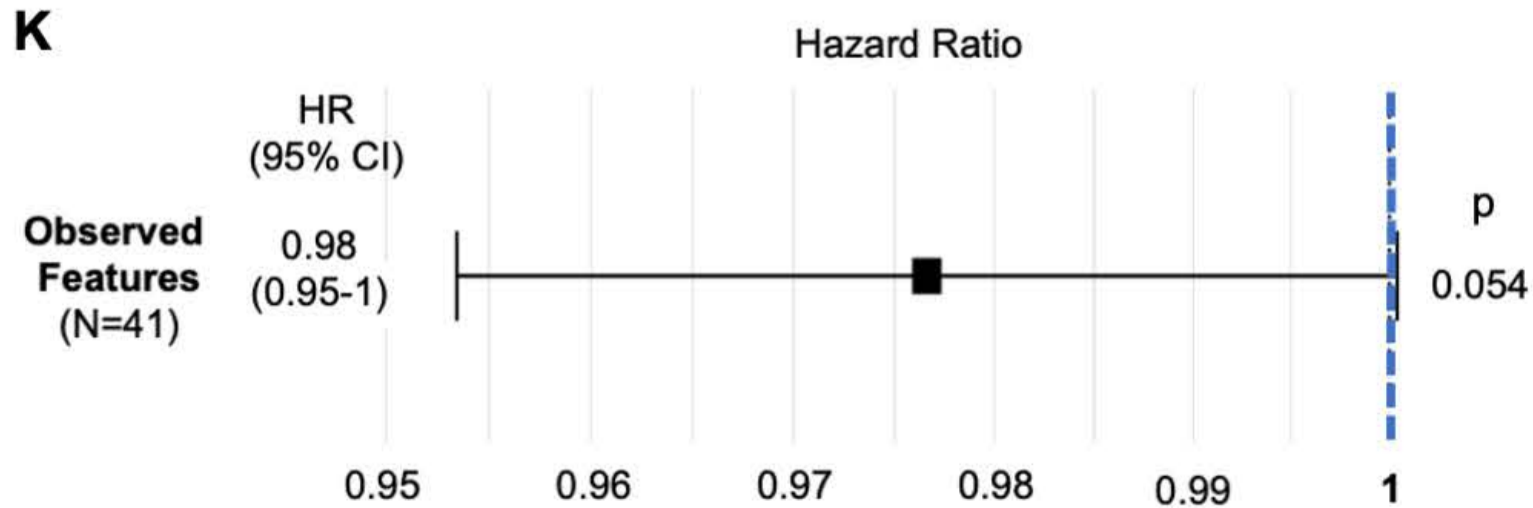**L**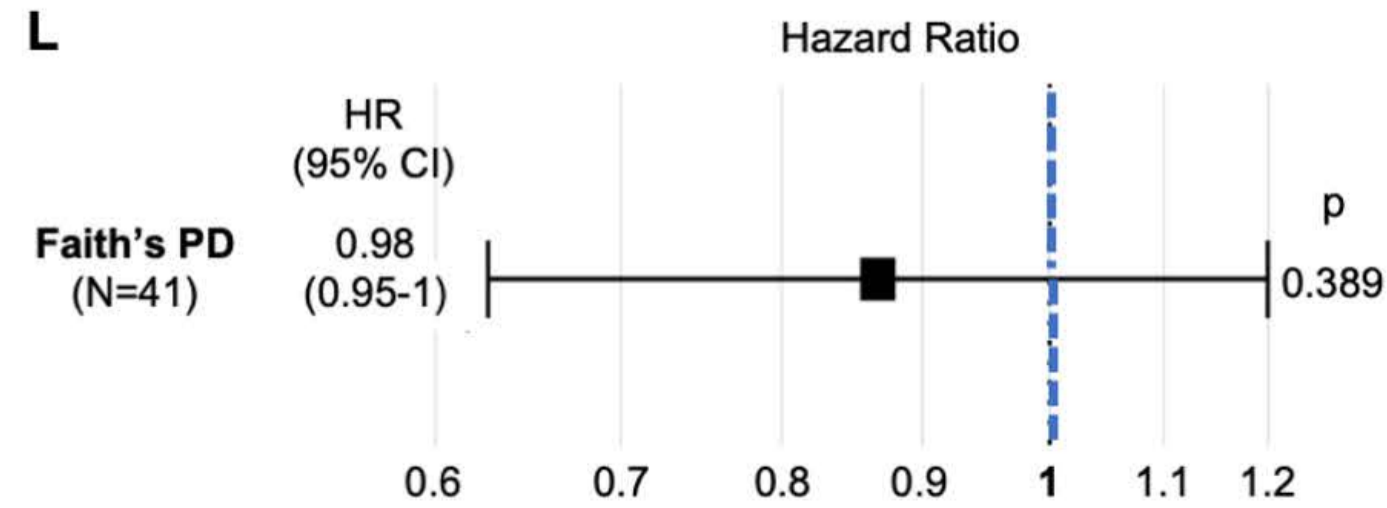**M**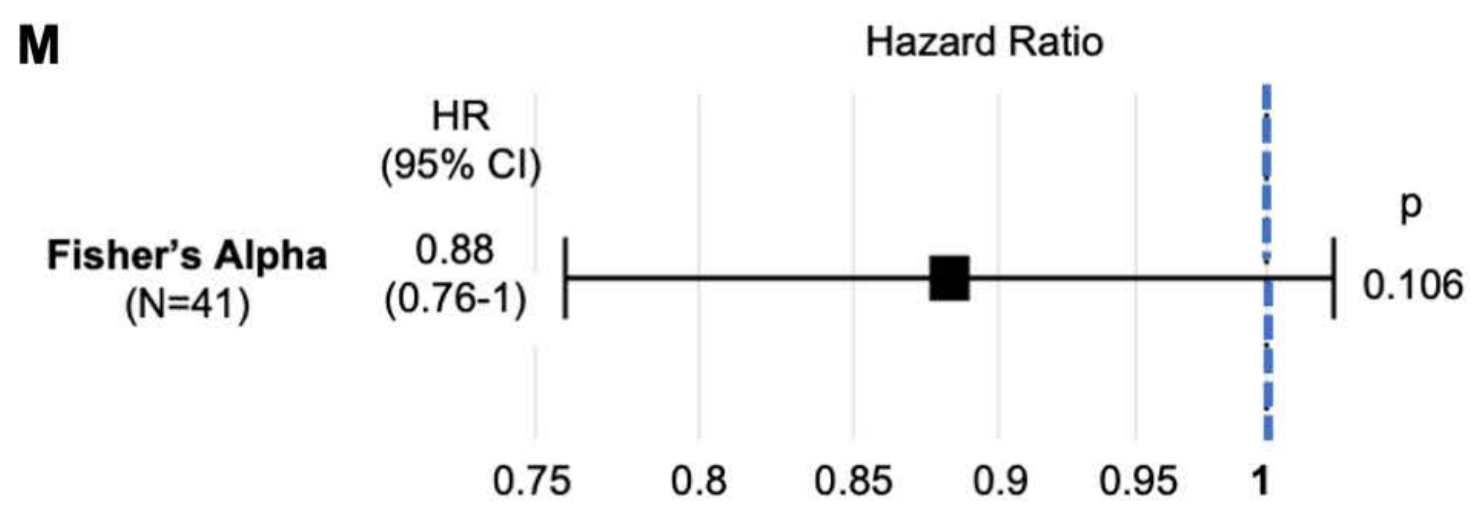

**Supplemental Figure 2. Tumor microbiome metrics do not change significantly over time and there is no bacterial, fungal or viral surrogate for *L. iners*, related to Figure 1.**

- A. Box plot of Simpson's Diversity Index during CRT in tumor samples. Comparisons were made using a paired t-test to compare week 1 (N=68), week 3 (N=66), week 5 (N=78), and follow-up (N=30) timepoints to baseline (N=96). Asterisks denote a significant p-value (<0.05).
- B. Box plot of Pielou's Evenness Index during CRT in tumor samples. Comparisons were made using a paired t-test to compare week 1 (N=68), week 3 (N=66), week 5 (N=78), and follow-up (N=30) timepoints to baseline (N=96). Asterisks denote a significant p-value (<0.05).
- C. Box plot of Observed Features during CRT in tumor samples. Comparisons were made using a paired t-test to compare week 1 (N=68), week 3 (N=66), week 5 (N=78), and follow-up (N=30) timepoints to baseline (N=96). Asterisks denote a significant p-value (<0.05).
- D. Box plot of Faith's Phylogenetic Diversity (PD) during CRT in tumor samples. Comparisons were made using a paired t-test to compare week 1 (N=68), week 3 (N=66), week 5 (N=78), and follow-up (N=30) timepoints to baseline (N=96). Asterisks denote a significant p-value (<0.05).
- E. Box plot of Firsher's Alpha during CRT in tumor samples. Comparisons were made using a paired t-test to compare week 1 (N=68), week 3 (N=66), week 5 (N=78), and follow-up (N=30) timepoints to baseline (N=96). Asterisks denote a significant p-value (<0.05).
- F. Heatmap of unsupervised hierarchical clustering of the top 25 species in baseline samples. Blue color represents low relative counts of a species while red indicates a high relative count.
- G. Box plot of relative counts of *Gardnerella vaginalis* during CRT in tumor samples. Comparisons were made using a paired t-test to compare week 1 (N=68), week 3 (N=66), week 5 (N=78), and follow-up (N=30) timepoints to baseline (N=96).
- H. Box plot of relative counts of *Prevotella bivia* during CRT in tumor samples. Comparisons were made using a paired t-test to compare week 1 (N=68), week 3 (N=66), week 5 (N=78), and follow-up (N=30) timepoints to baseline (N=96).
- I. Box plot of relative counts of *Atopobium vaginae* during CRT in tumor samples. Comparisons were made using a paired t-test to compare week 1 (N=68), week 3 (N=66), week 5 (N=78), and follow-up (N=30) timepoints to baseline (N=96).
- J. Kaplan-Meier analysis for recurrence free survival stratified by baseline presence (N=55) or absence (N=41) of tumoral *Gardnerella vaginalis*. Log-rank p-value reported.
- K. Kaplan-Meier analysis for recurrence free survival stratified by baseline presence (N=45) or absence (N=50) of tumoral *Prevotella bivia*. Log-rank p-value reported.
- L. Kaplan-Meier analysis for recurrence free survival stratified by baseline presence (N=34) or absence (N=62) of tumoral *Atopobium vaginae*. Log-rank p-value reported.
- M. Bar plot of baseline fungi reads per million (log normalized) by baseline *L. iners* status (Absent [N=69] vs. Present [N=64]). Comparison was made using an independent t-test.
- N. Bar plot of baseline fungi reads per million (log normalized) by response (Responders [N=73] vs. Non-responders [N=23]). Comparison was made using an independent t-test.
- O. Bar plot of baseline total viral reads per million (log normalized) by baseline *L. iners* status (Absent [N=49] vs. Present [N=4]). Comparison was made using an independent t-test.
- P. Bar plot of baseline total viral reads per million (log normalized) by response (Responders [N=73] vs. Non-responders [N=23]). Comparison was made using an independent t-test.



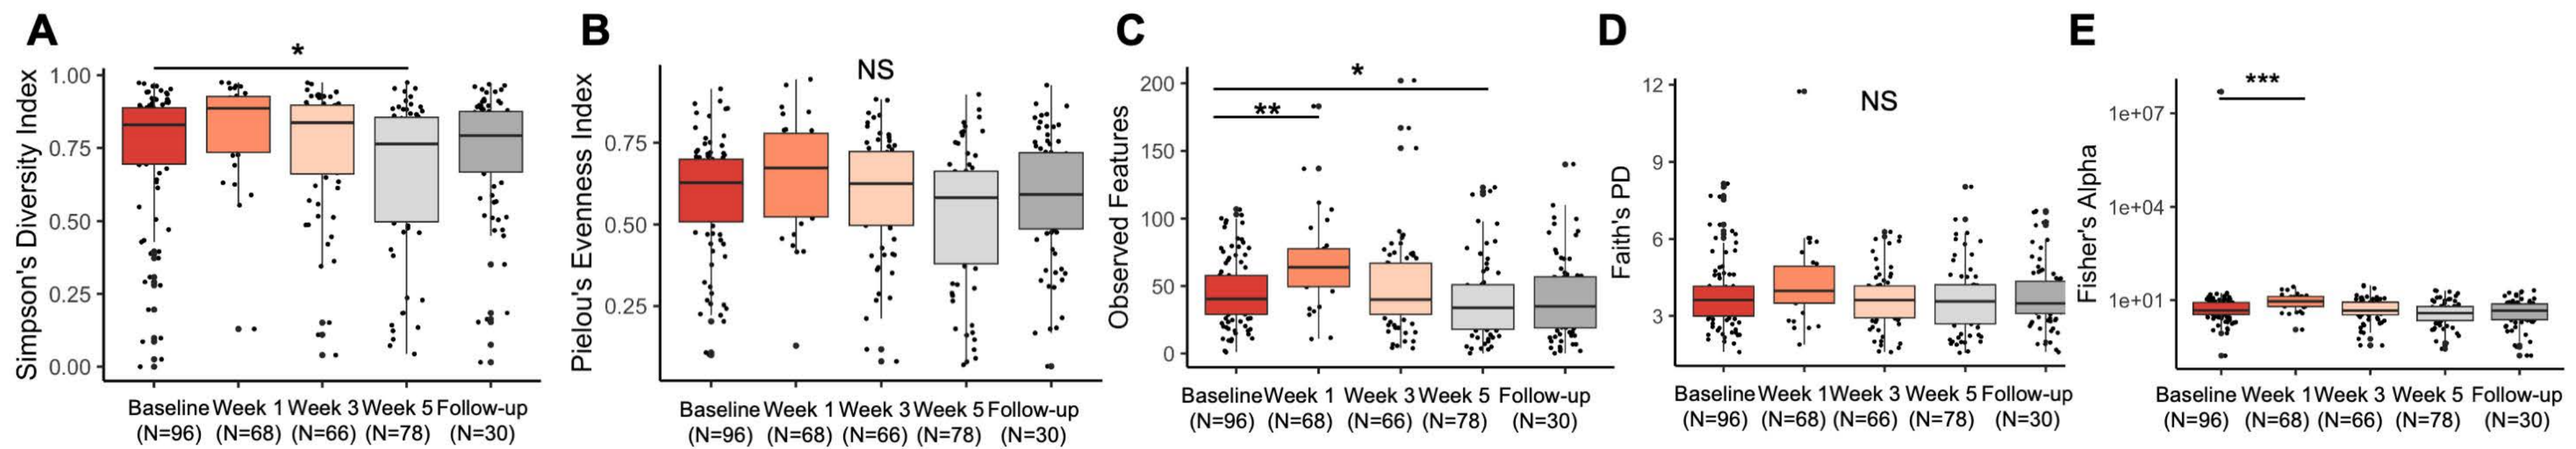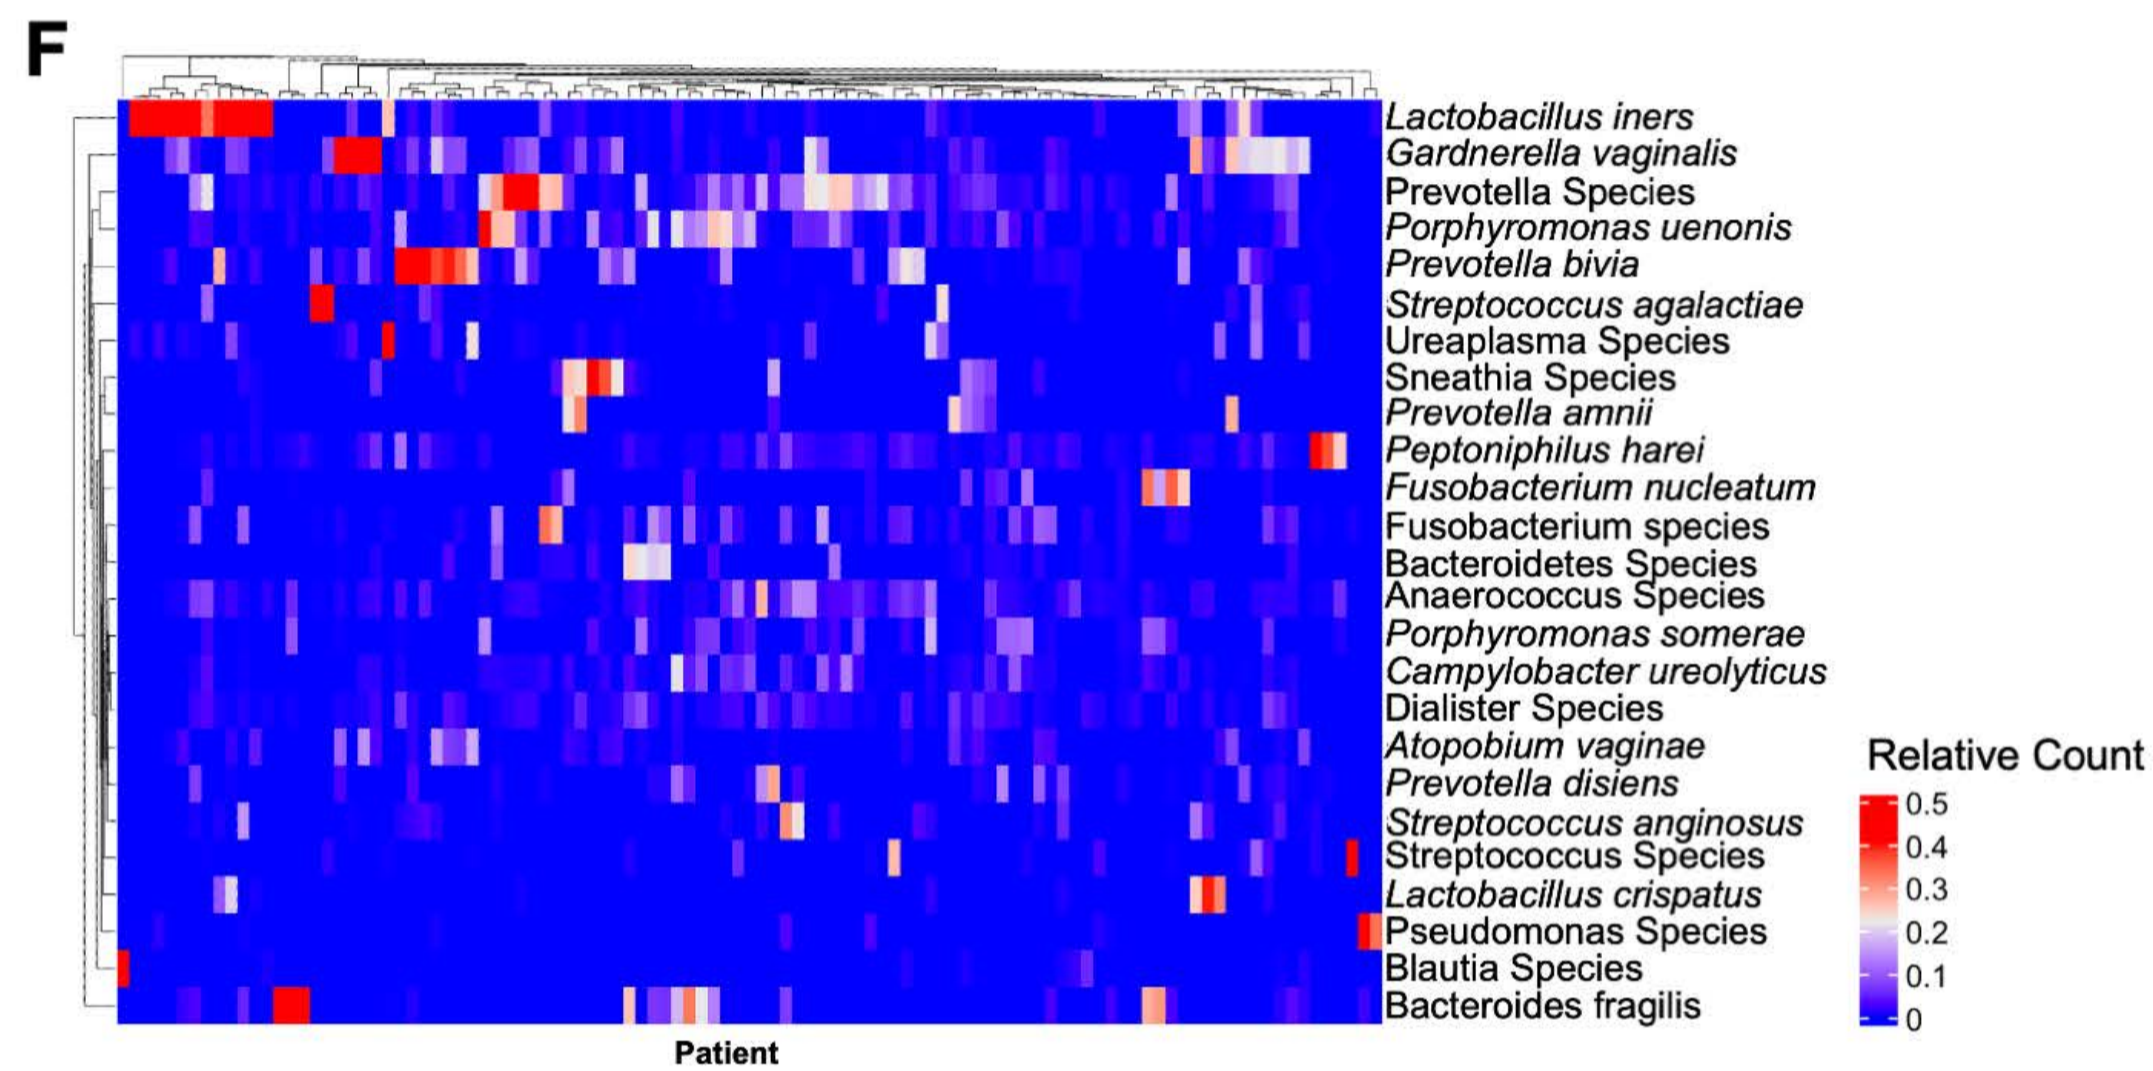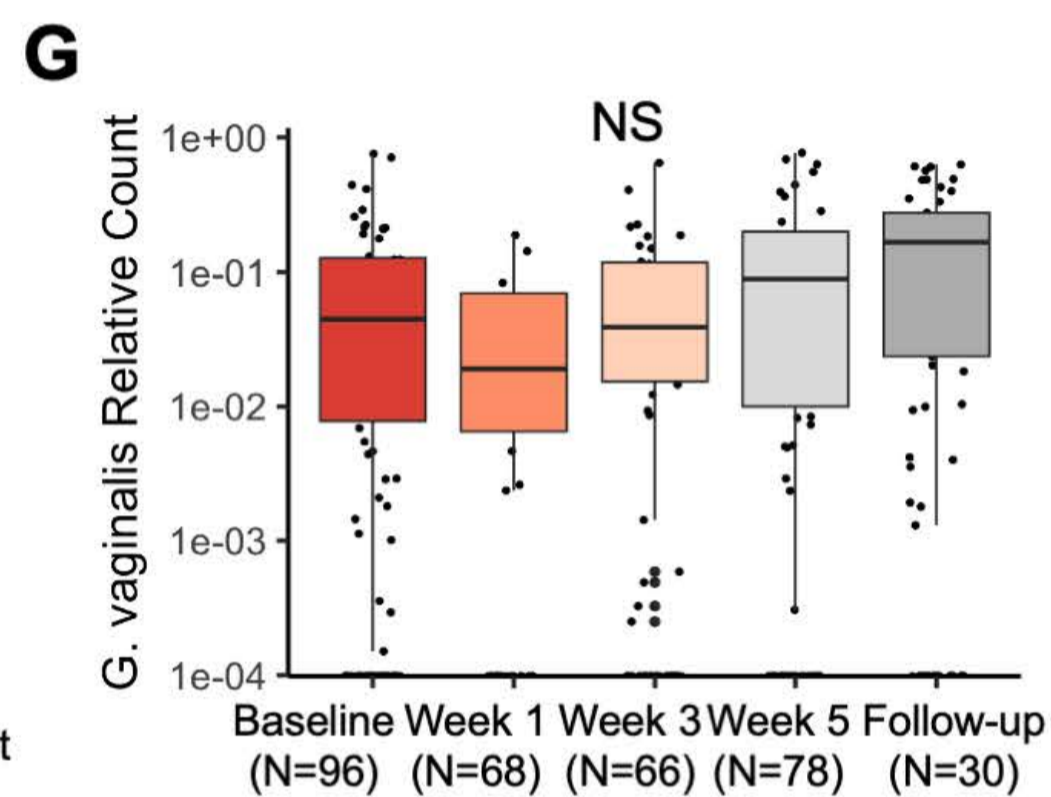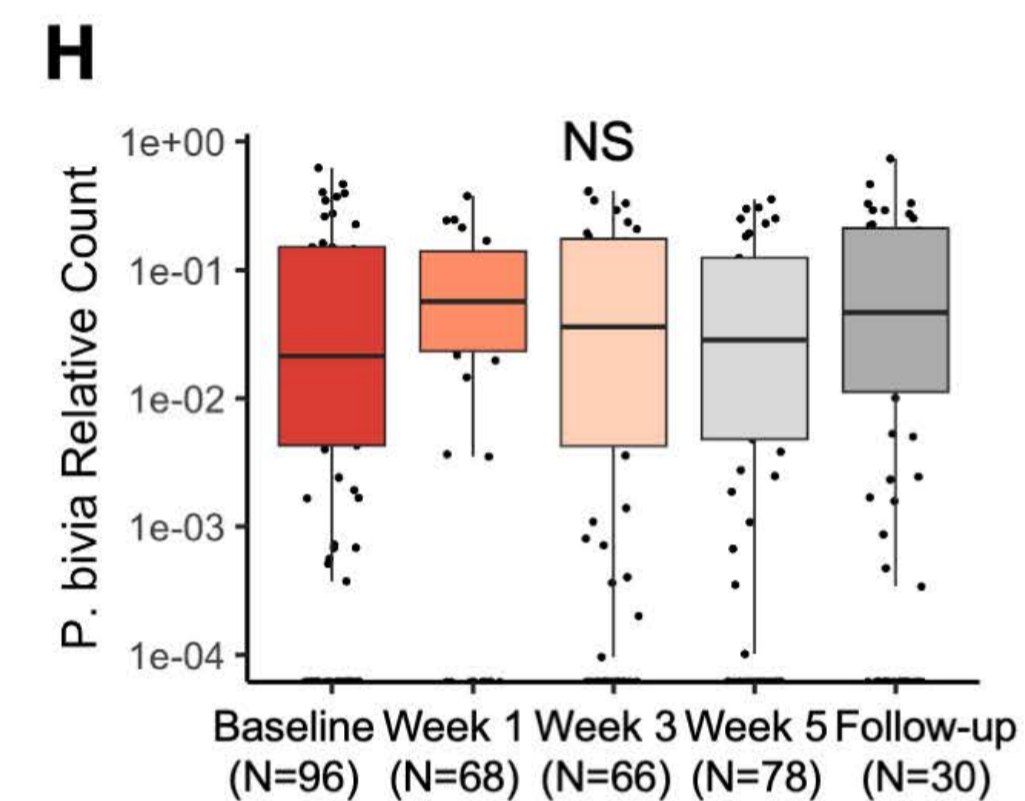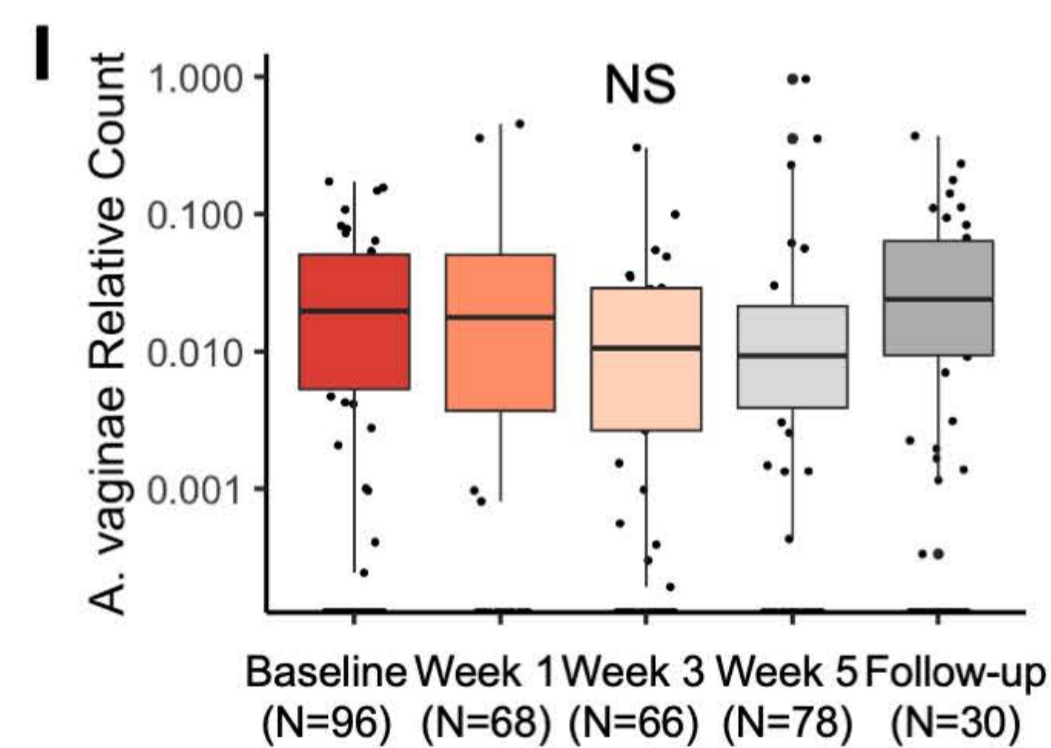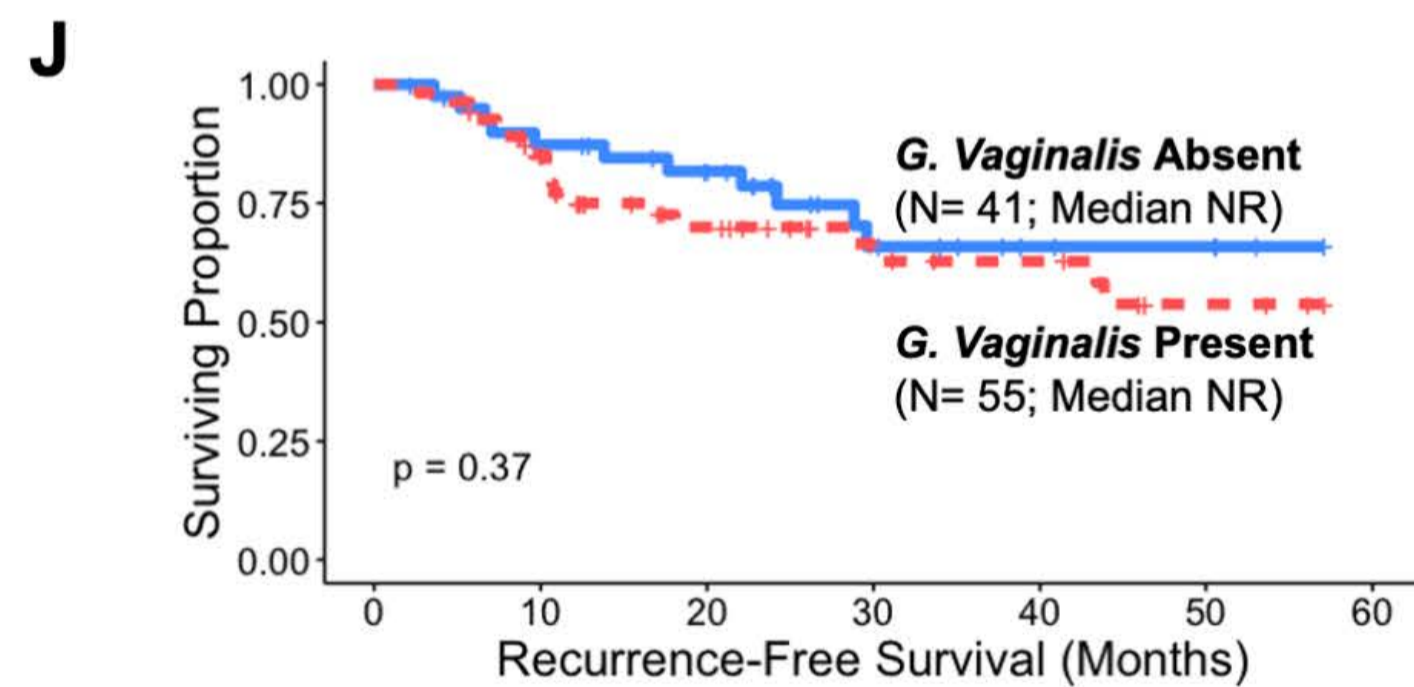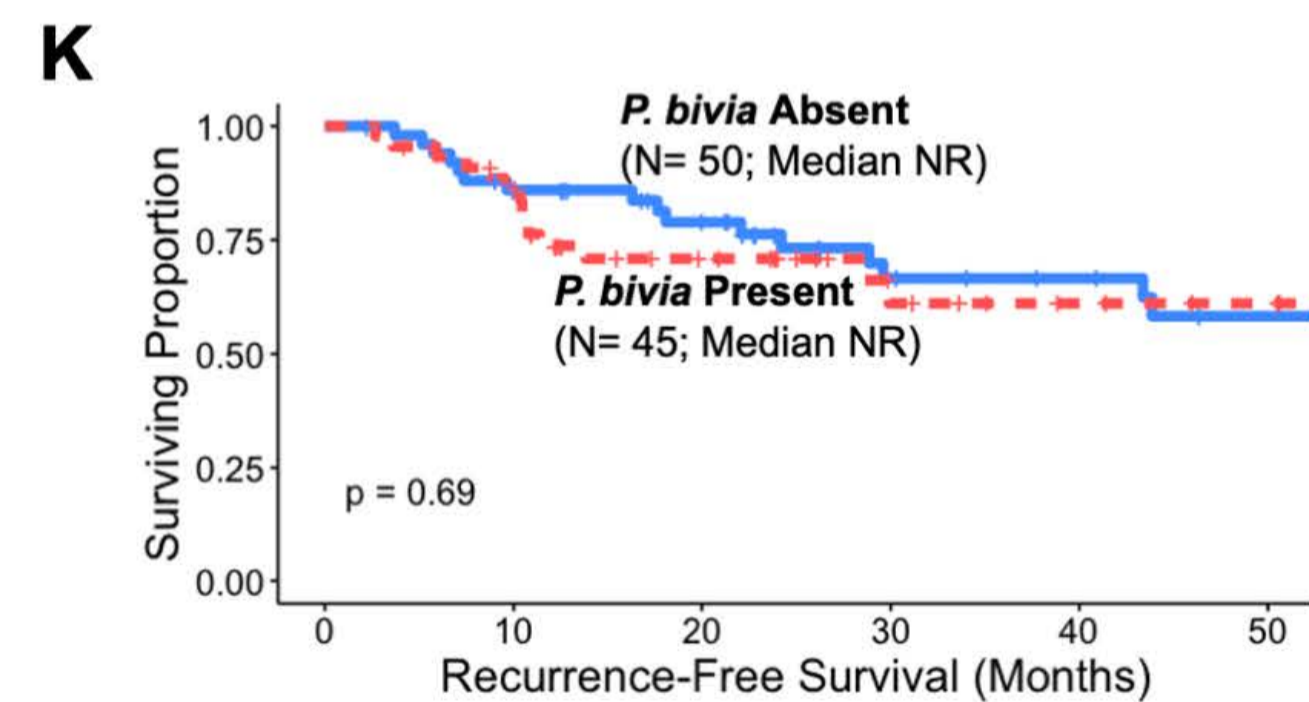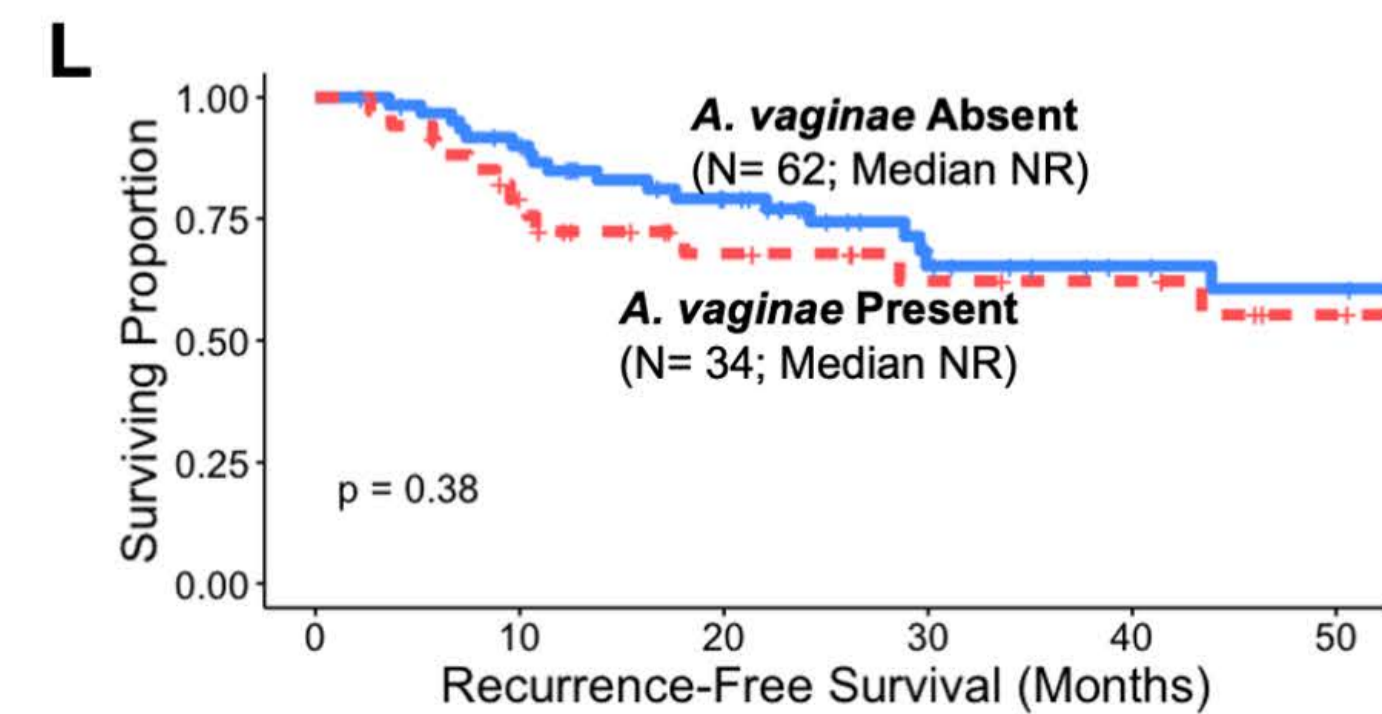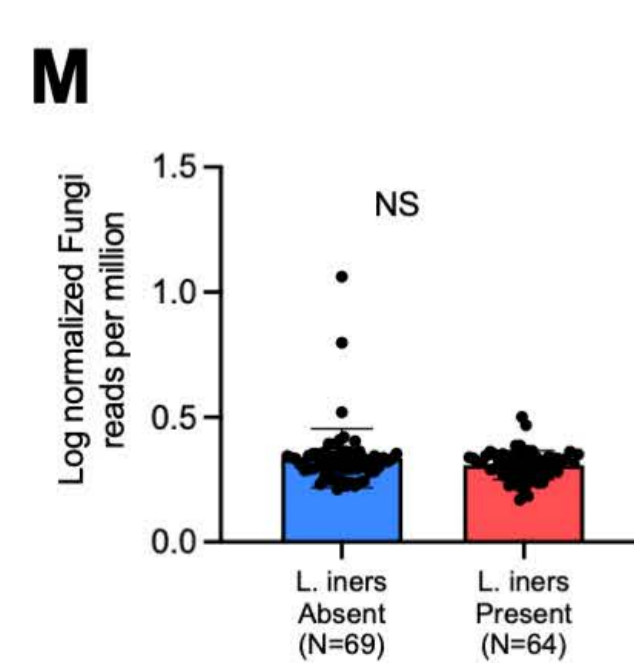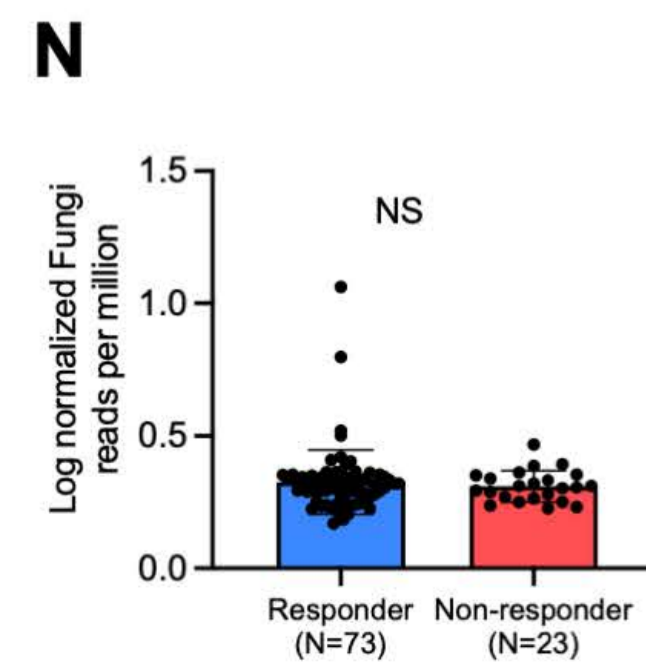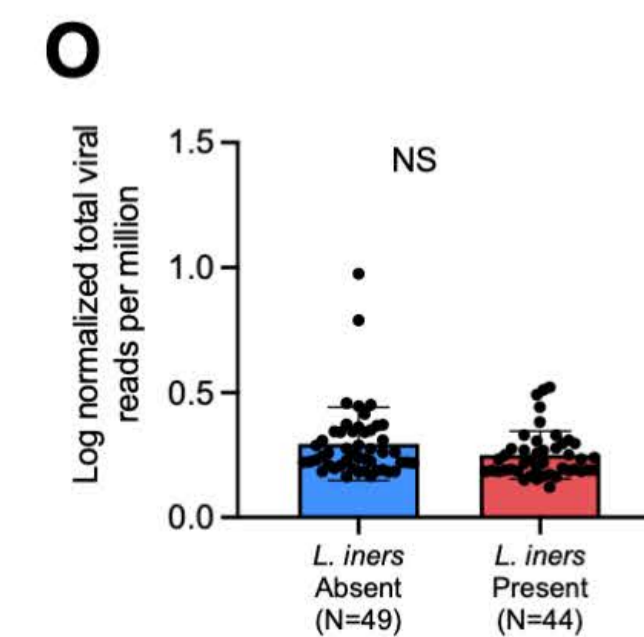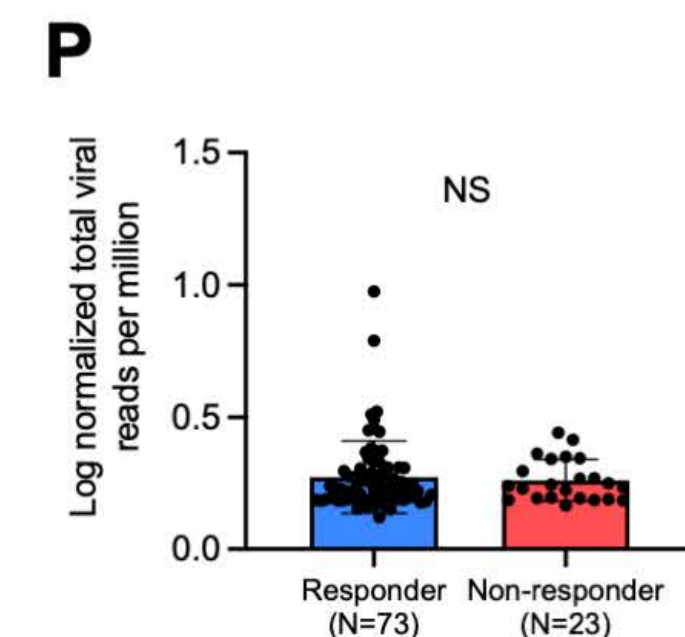

**Supplemental Figure 3. Gut microbiome features are significant in univariate, but not multivariate analysis, and patients with gut *L. iners* have tumor *L. iners*, related to Figure 1.**

- A. Multivariate cox proportional hazard analysis of overall survival including Pielou Evenness in the gut microbiome (N=90) and relative counts of baseline tumoral *L. iners* (N=90).
- B. Linear discriminant analysis effect size (LEfSe) was performed using 16S data for baseline gut bacteria associated with response (Non-responders [N=22] vs. Responders [N=70] to CRT. Default parameters were used for LEfSe analysis with an LDA threshold of 3.0.
- C. Multivariate cox proportional hazard analysis of recurrence-free survival including 16S relative counts of baseline *E. shigella* in the gut microbiome (N=89) and relative counts of baseline tumoral *L. iners* (N=89).
- D. Kaplan-Meier curves for recurrence-free survival stratified by baseline presence (N=71) or absence (N=21) of gut *Escherichia Shigella* on 16S. Log-rank p-value reported.
- E. Linear discriminant analysis effect size (LEfSe) was performed using 16S ribosomal RNA sequencing data for baseline gut bacteria associated with tumor *L. iners* status (Absent [N=48] vs. Present [N=42] to CRT. Default parameters were used for LEfSe analysis with an LDA threshold of 3.5.
- F. Absolute number of patients with tumoral *L. iners* alone (N=17) vs. gut microbiome *L. iners* alone (N=5) vs. both (N=25). 43 patients did not have *L. iners* present in their gut or tumor microbiome.
- G. Kendall Rank correlation between baseline gut and tumor *L. iners*.

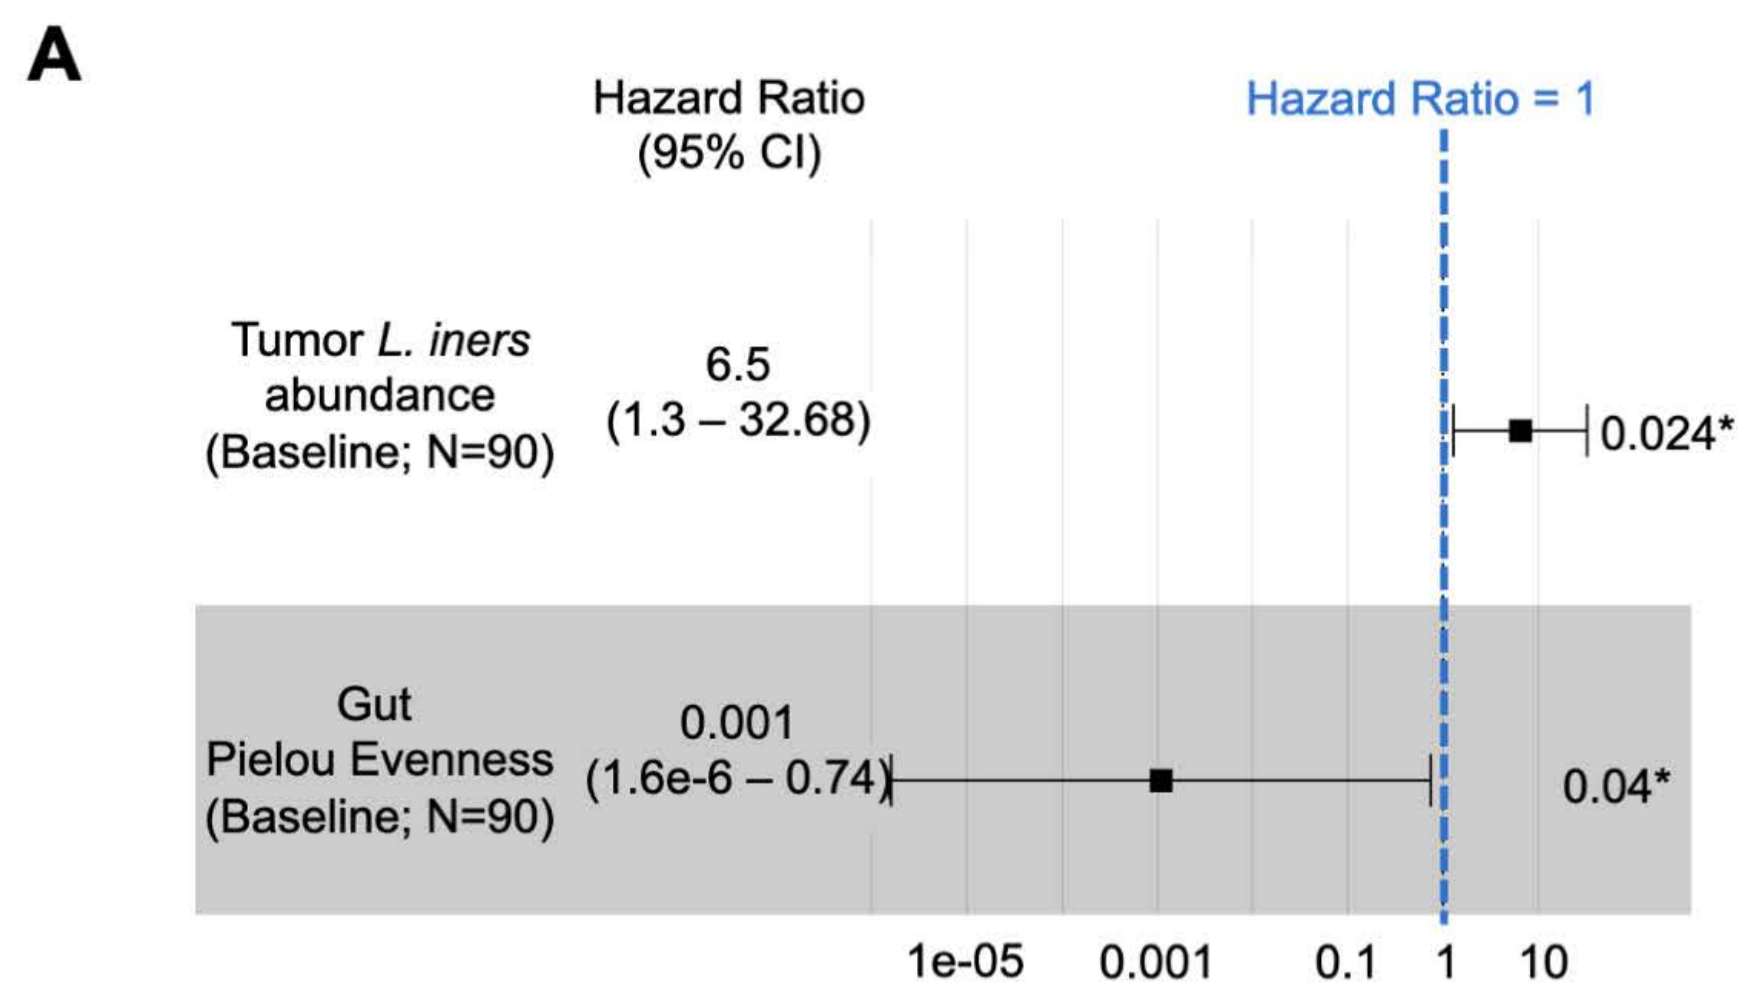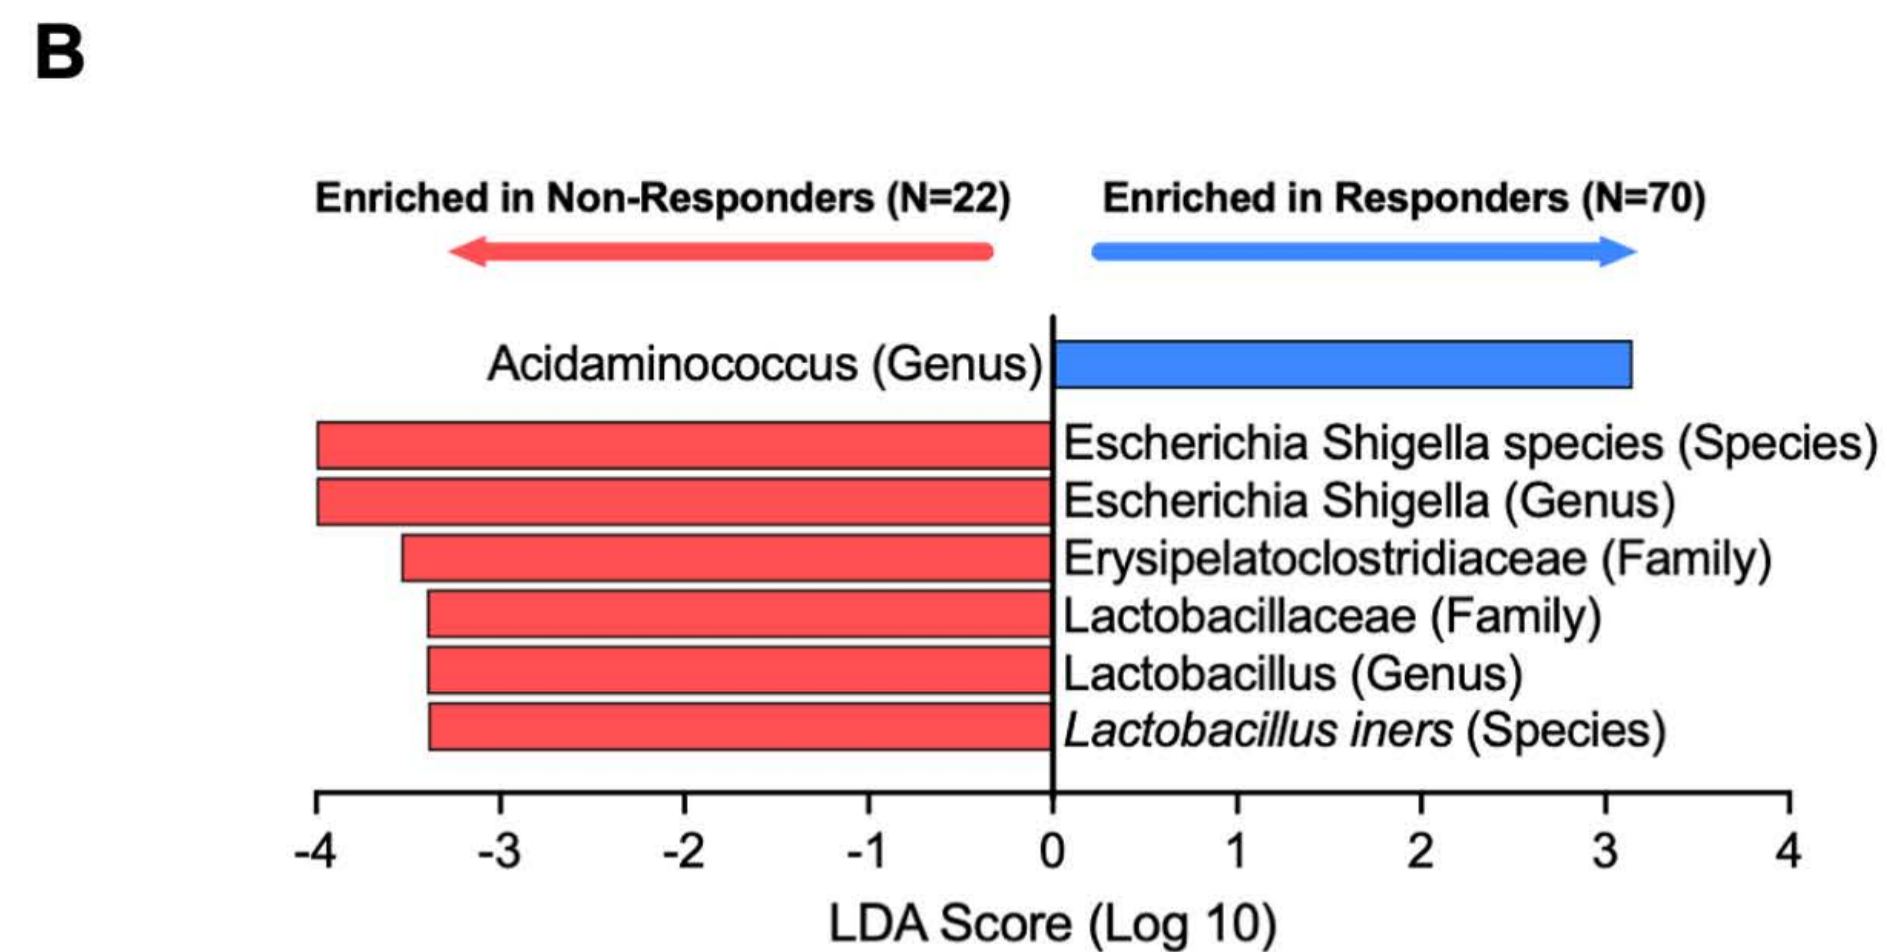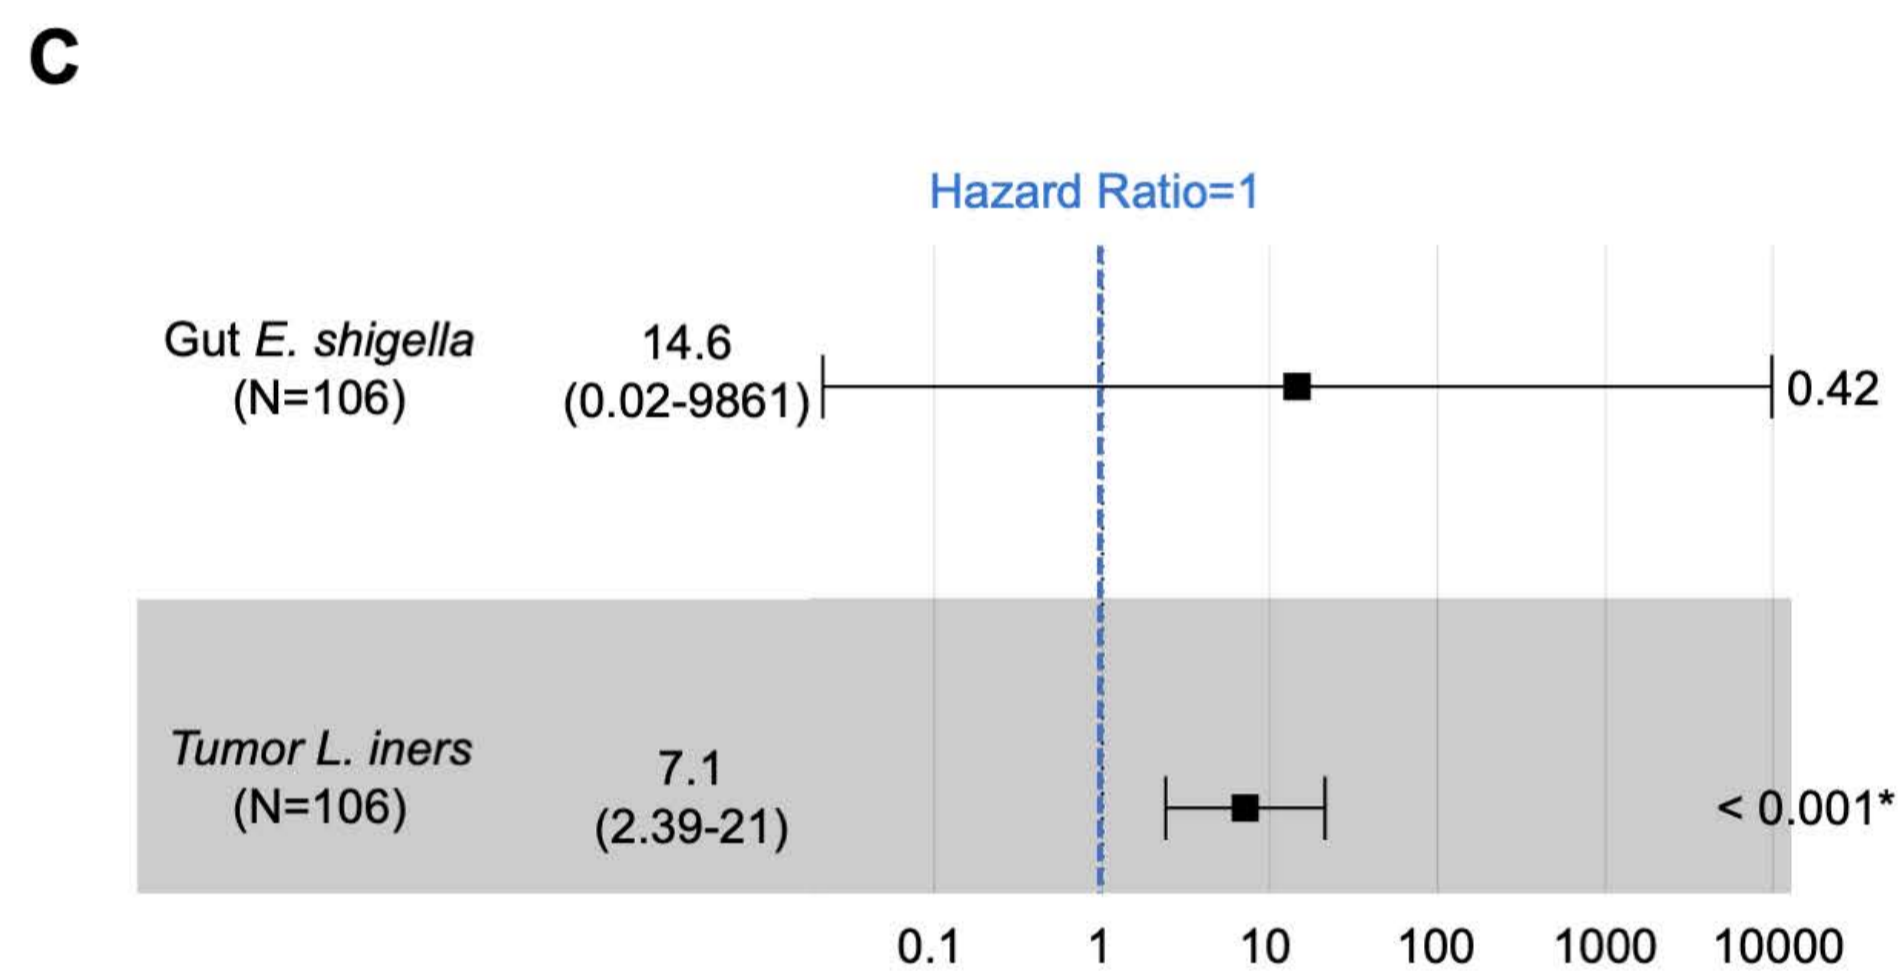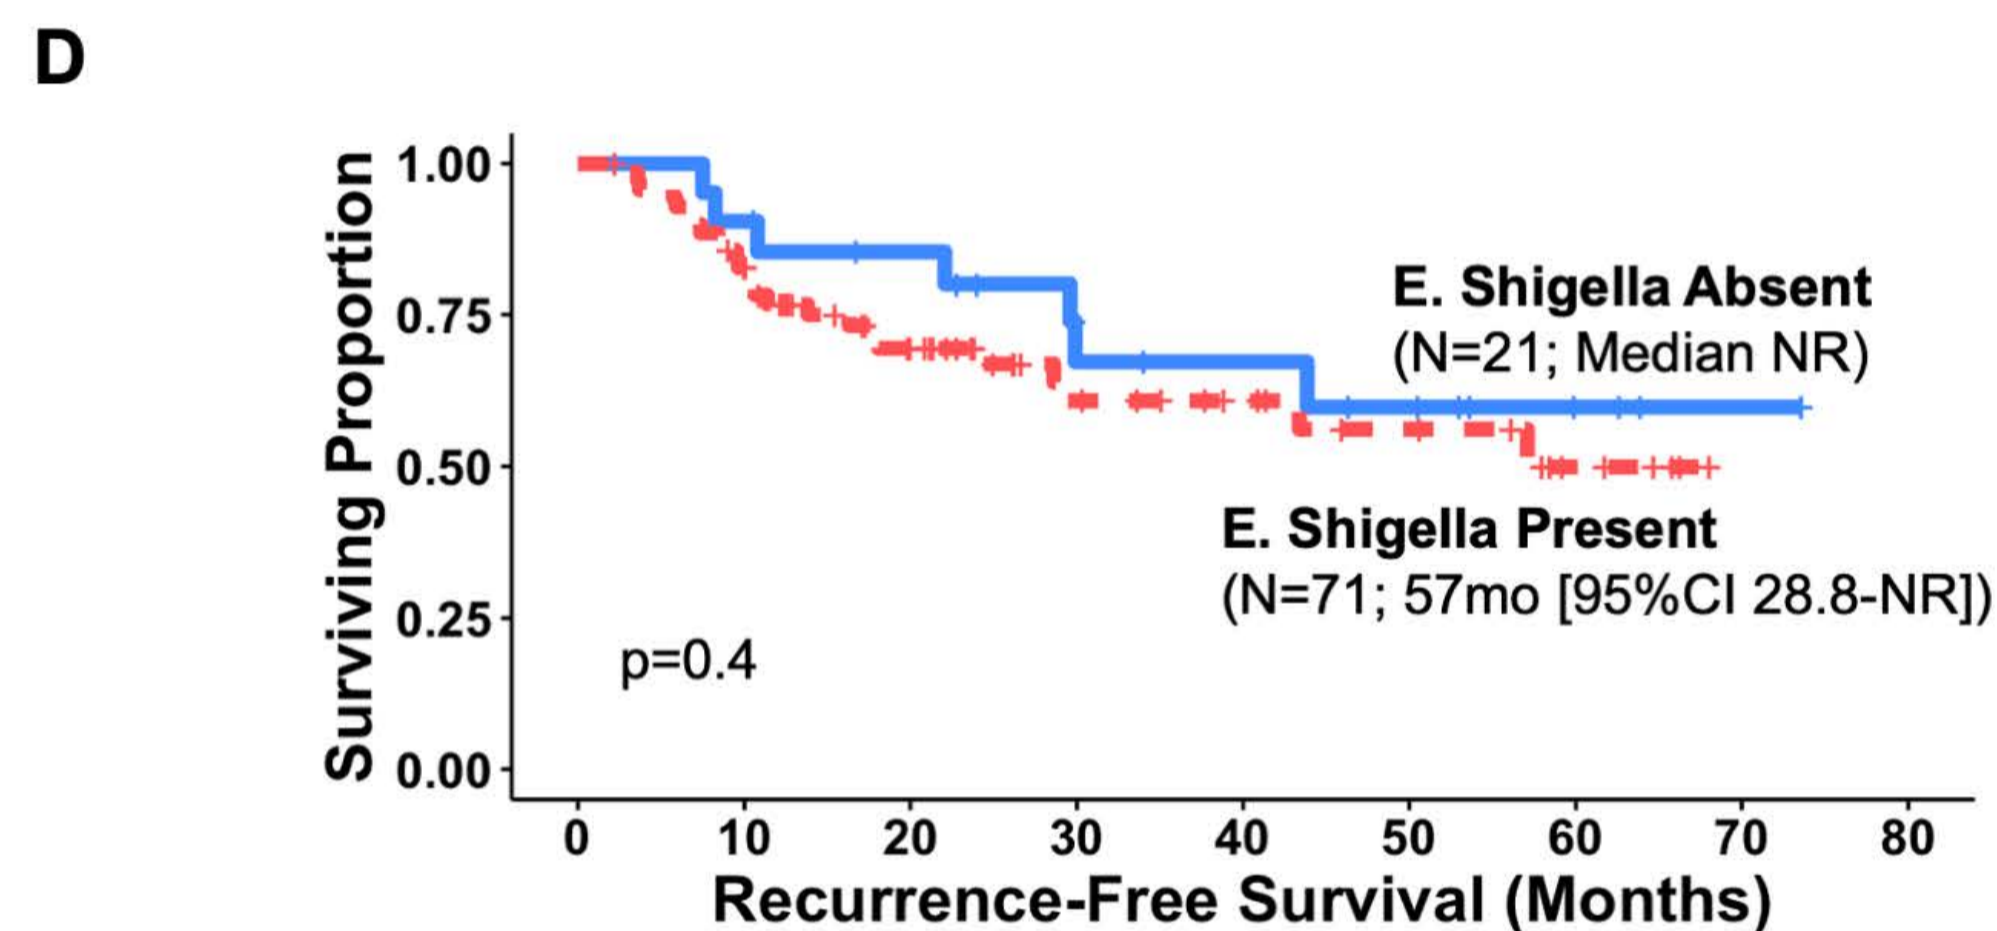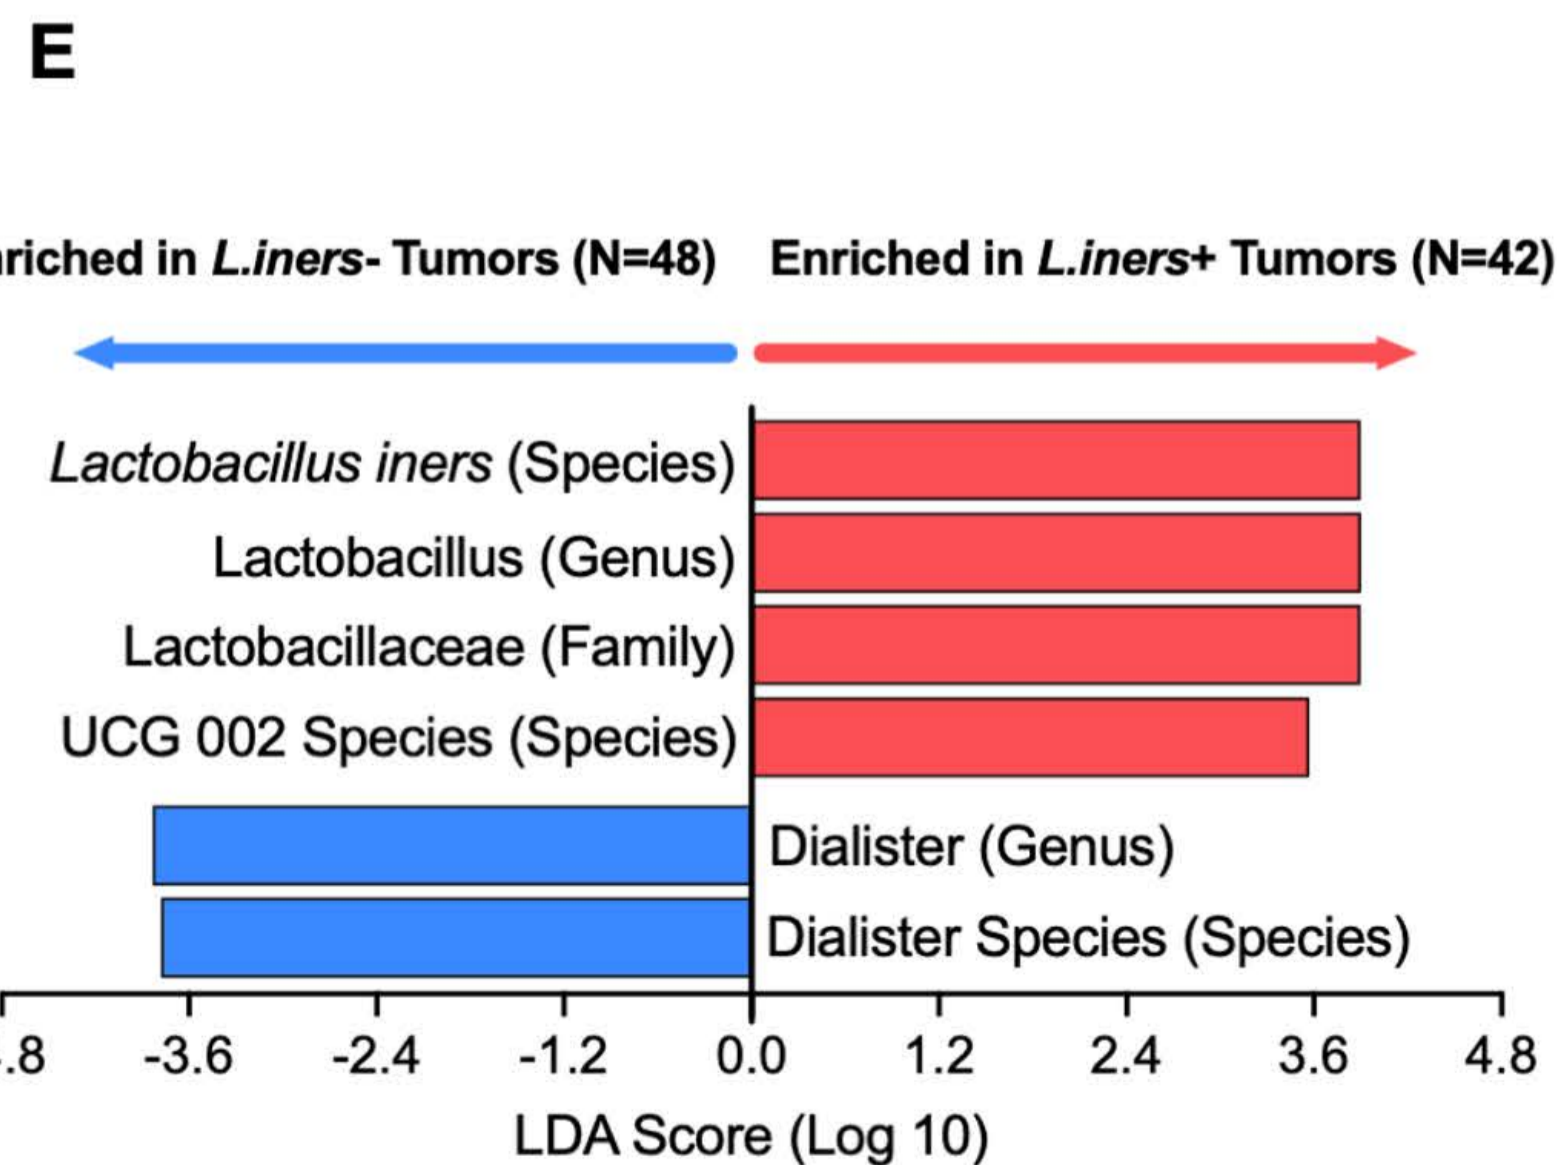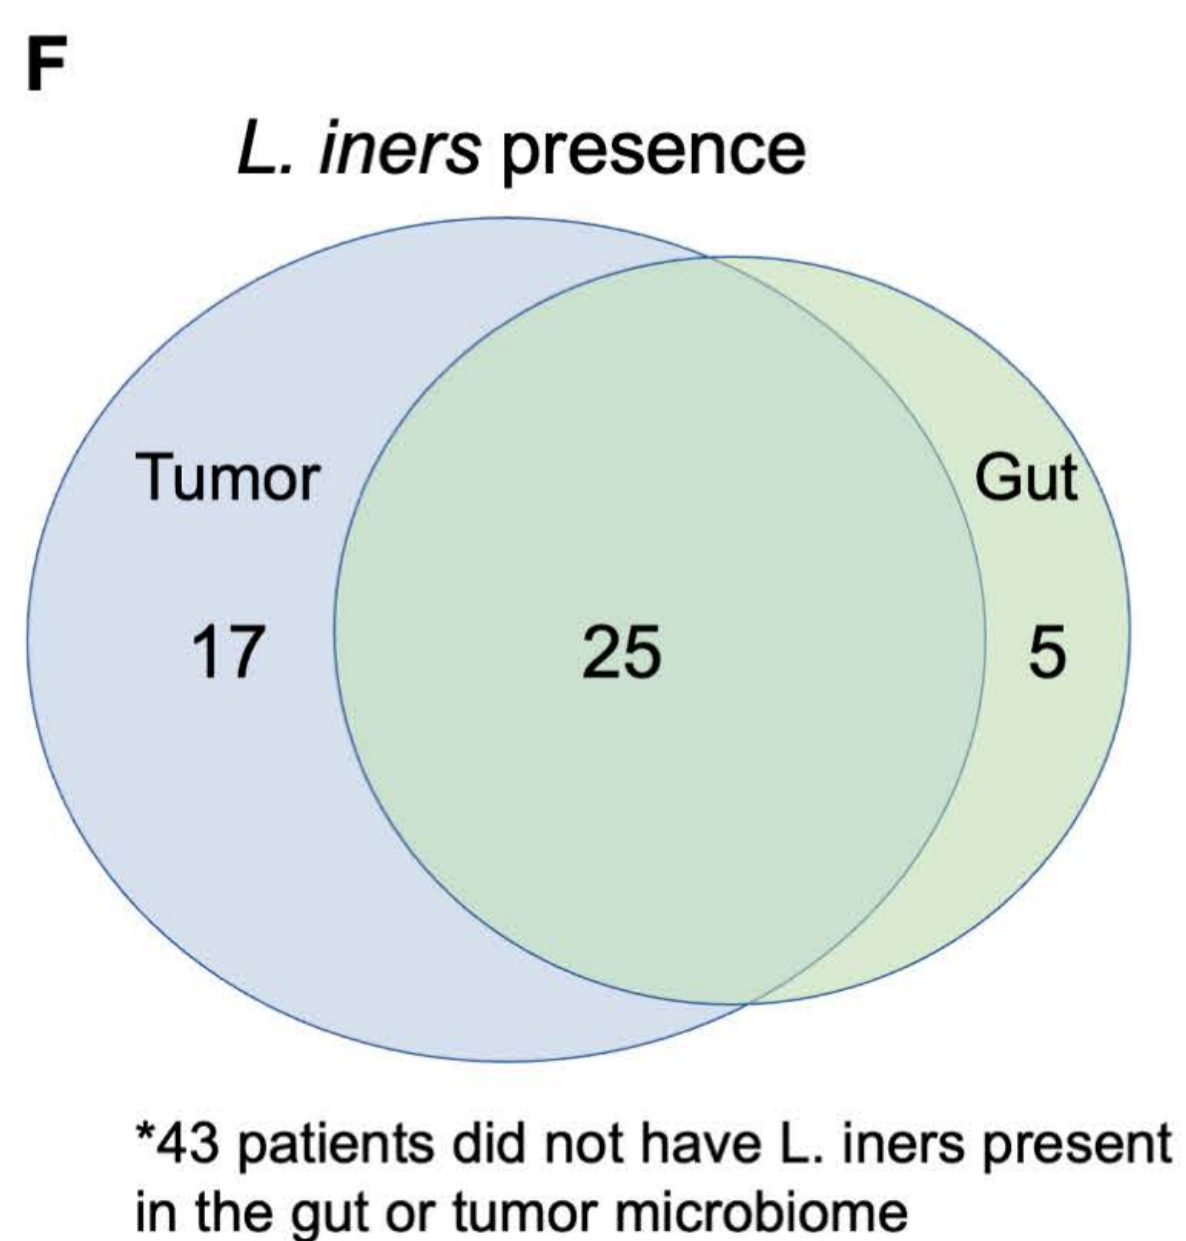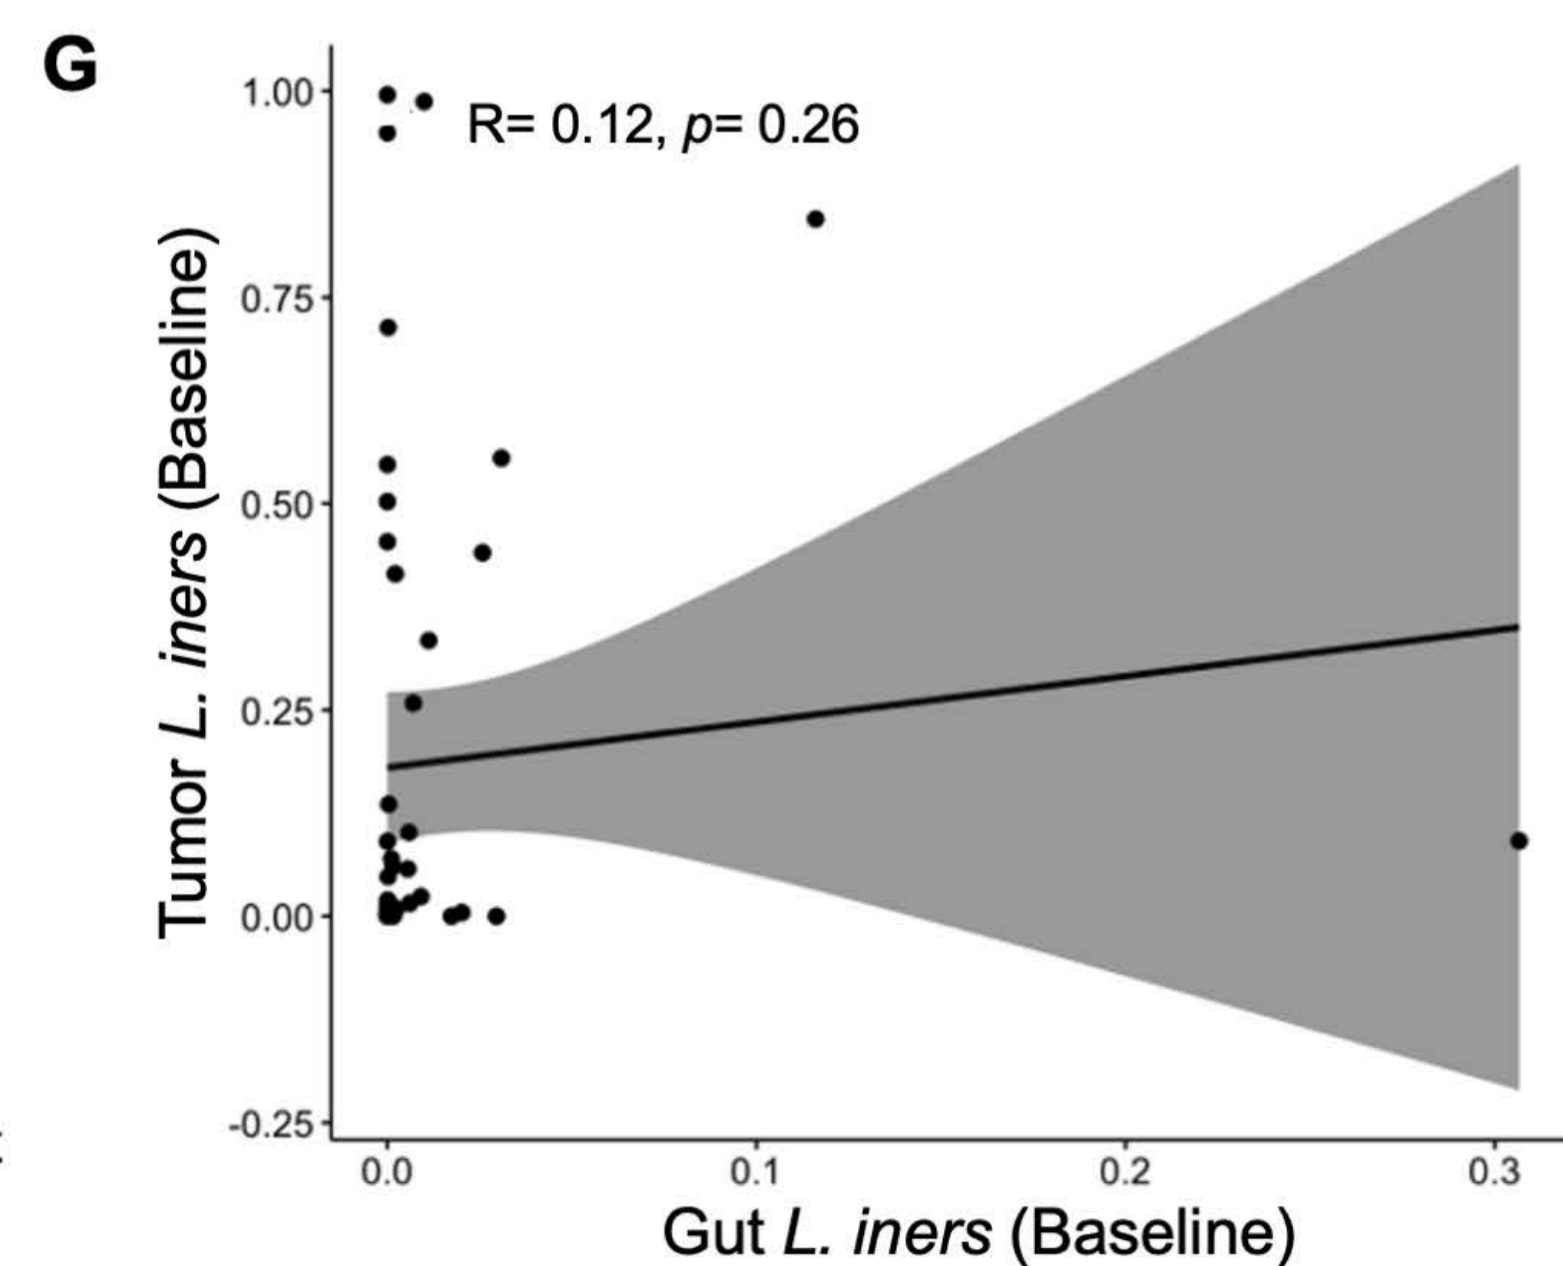

**Supplemental Figure 4. *L. iners*- have increased T-cell infiltration and T-cells are more resilient to CRT, related to Figure 1.**

- A. Overall productive templates in tumor samples from T-cell receptor sequencing. N=59. unpaired t-test for comparison. \*  $p < 0.05$ ,  $< 0.01$ .
- B. Overall tumor CD3+ cells (% lymphocytes) on flow cytometry. N=70. unpaired t-test for comparison. \*  $p < 0.05$ ,  $< 0.01$ .
- C. Overall tumor CD4+ cells (% lymphocytes) on flow cytometry. N=70. unpaired t-test for comparison. \*  $p < 0.05$ ,  $< 0.01$ . \*\*  $p > 0.01$ ,  $< 0.001$
- D. Overall tumor CD8+ cells (% lymphocytes) on flow cytometry. N=70. unpaired t-test for comparison. \*  $p < 0.05$ ,  $< 0.01$ .
- E. Total templates over time in tumor samples from T-cell receptor sequencing in *L. iners* + patients. N=30. paired t-test for comparison.
- F. Total templates over time in tumor samples from T-cell receptor sequencing in *L. iners* - patients. N=26. paired t-test for comparison.
- G. Productive clonality over time in tumor samples from T-cell receptor sequencing in *L. iners* + patients. N=30. paired t-test for comparison.
- H. Productive clonality over time in tumor samples from T-cell receptor sequencing in *L. iners* - patients. N=26. paired t-test for comparison.
- I. Productive templates over time in tumor samples from T-cell receptor sequencing in *L. iners* + patients. N=30. paired t-test for comparison.
- J. Productive templates over time in tumor samples from T-cell receptor sequencing in *L. iners* - patients. N=26. paired t-test for comparison.
- K. Maximum productive frequency over time in tumor samples from T-cell receptor sequencing in *L. iners* + patients. N=30. paired t-test for comparison.
- L. Maximum productive frequency over time in tumor samples from T-cell receptor sequencing in *L. iners* - patients. N=26. paired t-test for comparison.
- M. Maximum frequency over time in tumor samples from T-cell receptor sequencing in *L. iners* + patients. N=30. paired t-test for comparison.
- N. Maximum frequency over time in tumor samples from T-cell receptor sequencing in *L. iners* - patients. N=26. paired t-test for comparison.
- O. Productive rearrangements over time in tumor samples from T-cell receptor sequencing in *L. iners* + patients. N=30. paired t-test for comparison.
- P. Productive rearrangements over time in tumor samples from T-cell receptor sequencing in *L. iners* - patients. N=26. paired t-test for comparison.
- Q. Out of frame rearrangements over time in tumor samples from T-cell receptor sequencing in *L. iners* + patients. N=30. paired t-test for comparison.
- R. Out of frame rearrangements over time in tumor samples from T-cell receptor sequencing in *L. iners* - patients. N=26. paired t-test for comparison.
- S. Productive entropy over time in tumor samples from T-cell receptor sequencing in *L. iners* + patients. N=30. paired t-test for comparison.
- T. Productive entropy over time in tumor samples from T-cell receptor sequencing in *L. iners* - patients. N=26. paired t-test for comparison.
- U. HPV-specific TCR sequences as a proportion of total TCR sequences at each time point for *L. iners*+ vs. *L. iners*- patients. HPV-specific T-cells were identified from previously published datasets. 3-way ANOVA for comparison.

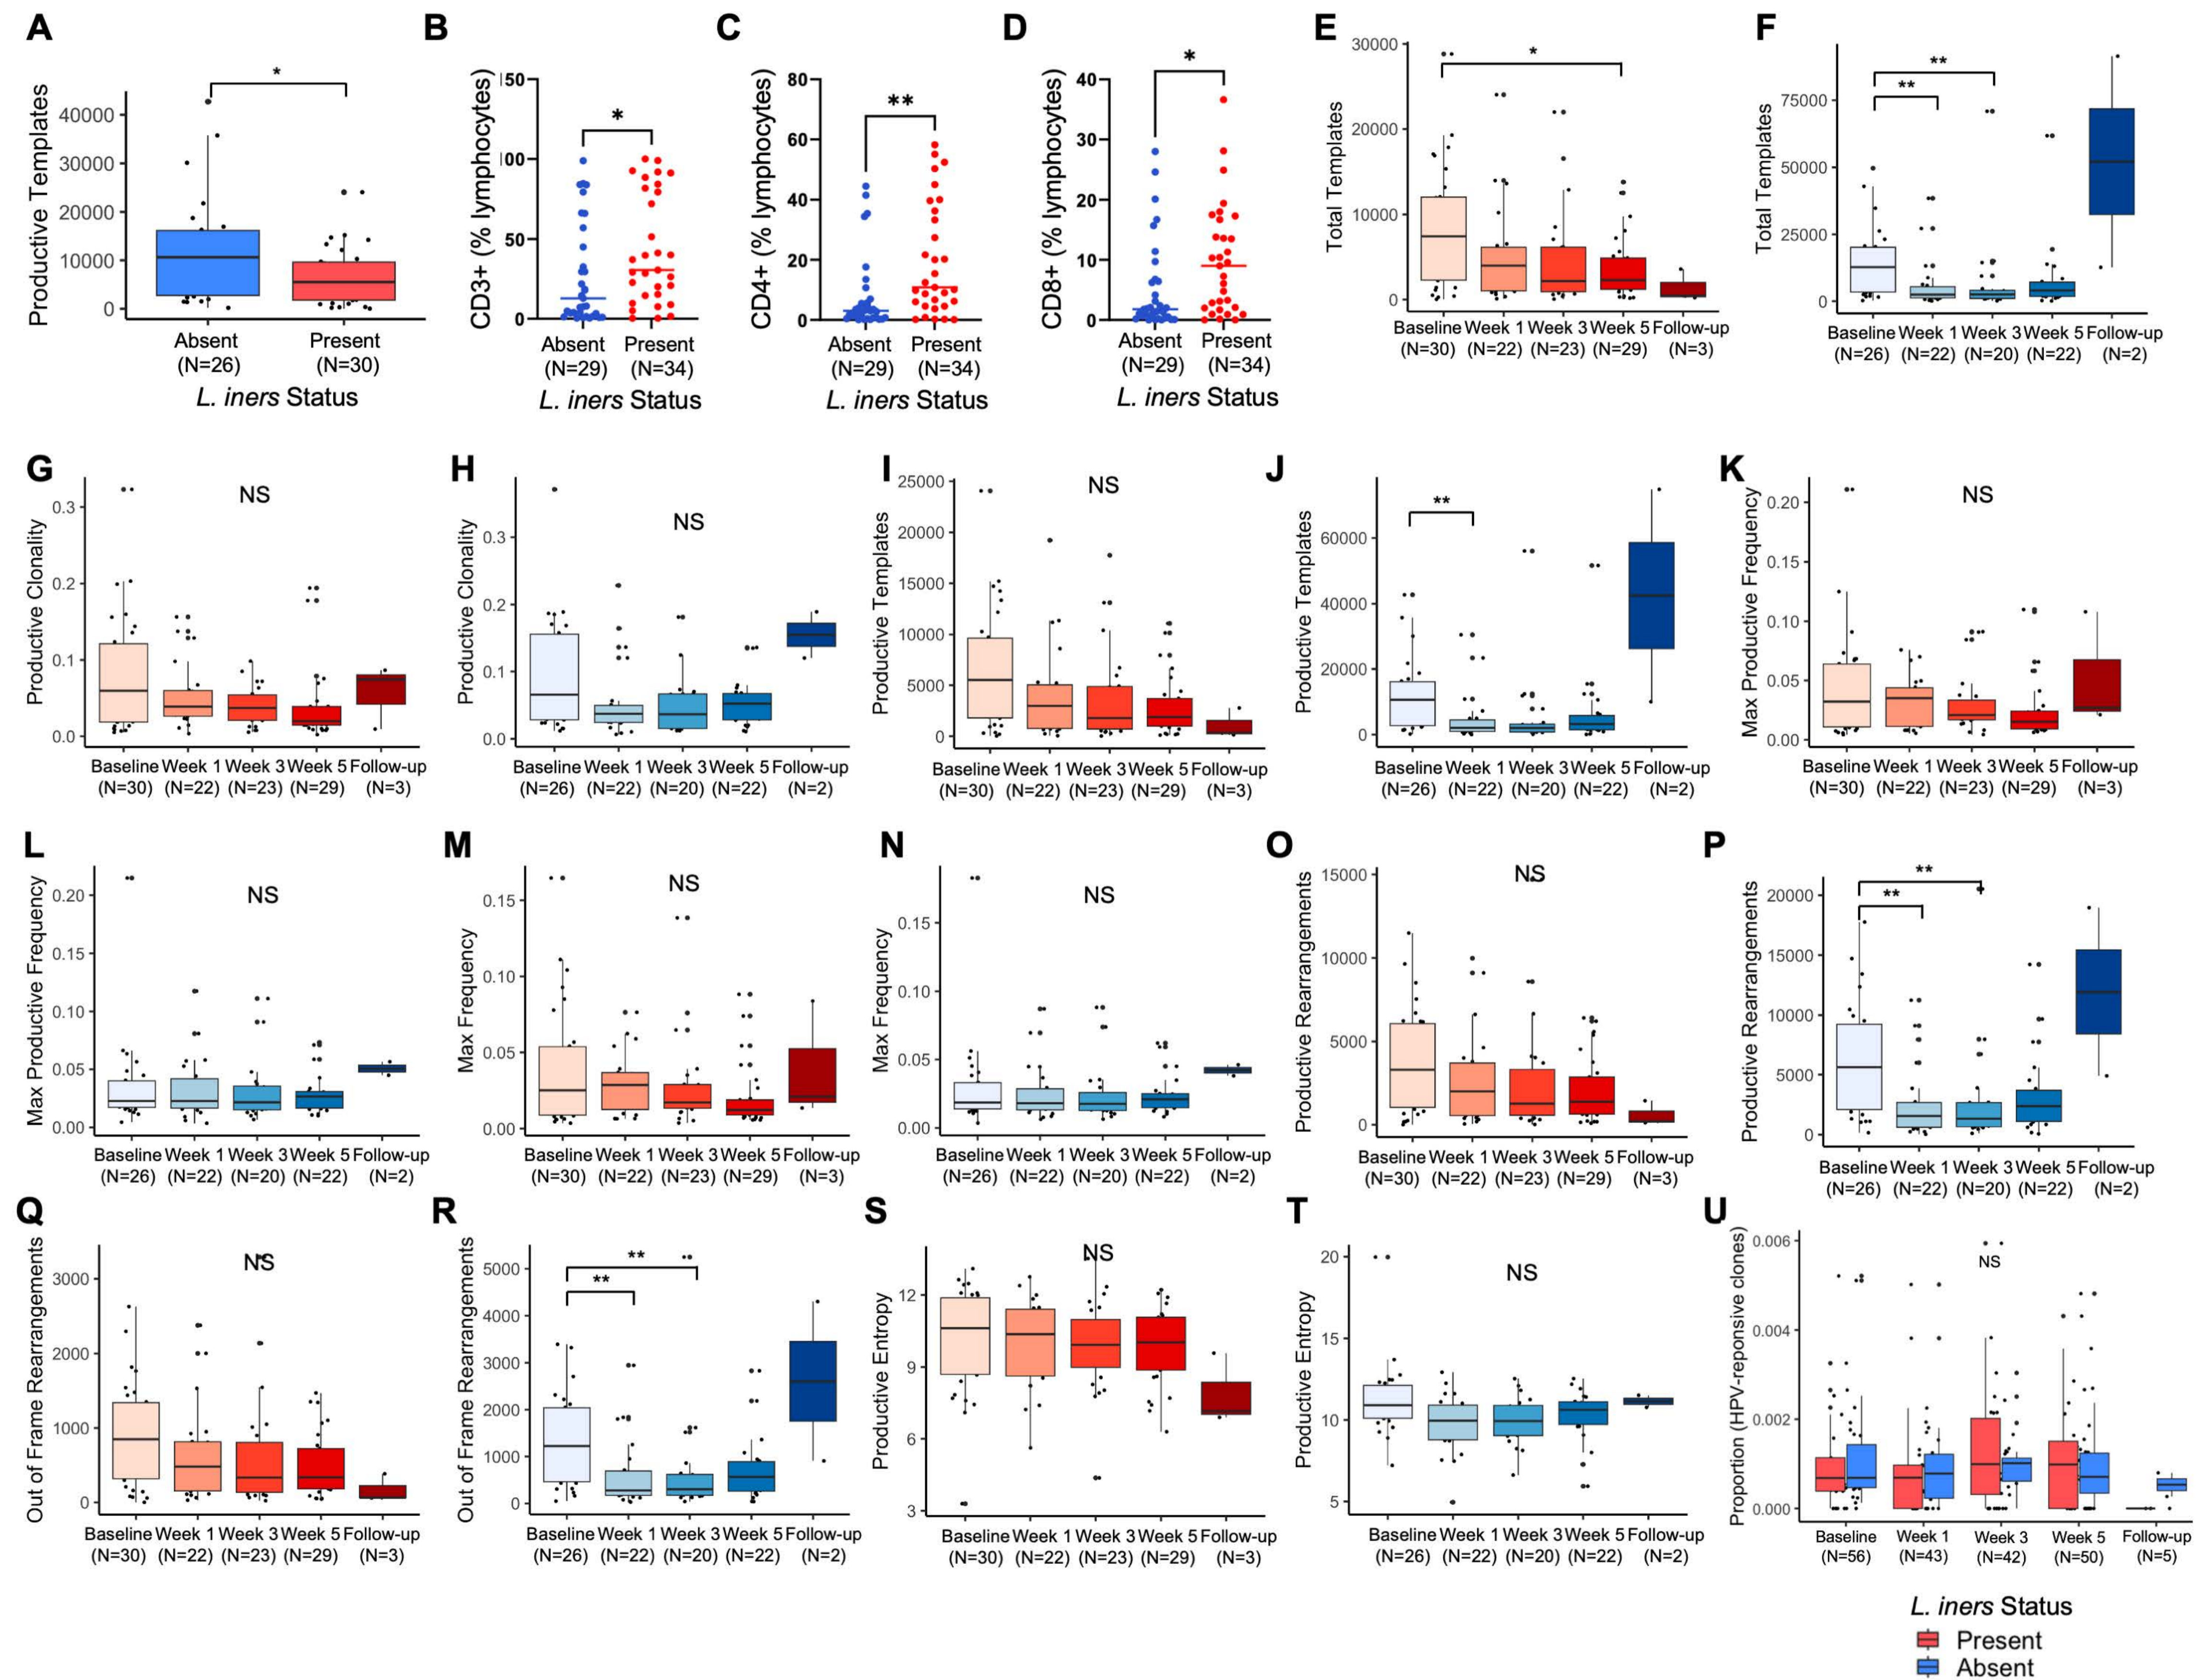

**Supplemental Figure 5. Experimental data for CFS in other cell lines**, related to Figure 2.

- A. CaSki and B1188 cells treated with increasing concentrations of CFS. No statistical comparison. 20% CFS was chosen
- B. Cell viability of B1188 alone after cisplatin treatment.
- C. Cell viability of B1188 alone after irradiation (2Gy)
- D. Histogram of organoid size and count (percentage of total counted) for PDO B1188 pretreated with CC-L. *iners* 366 CFS (red), CC-L. *iners* 370 CFS (dark red) vs. non-cancer derived L. *iners* (NC-L. *iners*; pink) vs. control (NYC Broth; grey) followed by 4Gy irradiation.
- E. Histogram of organoid size and count (percentage of total counted) for PDO B1188 pretreated with CC-L. *iners* 366 CFS (red), CC-L. *iners* 370 CFS (dark red) vs. non-cancer derived L. *iners* (NC-L. *iners*; pink) vs. control (NYC Broth; grey) followed by 8Gy irradiation..
- F. Cell viability (measured by CellTiter Glo) of Ca Ski cells pretreated with CC-L. *iners* cell-free supernatant (CFS) vs. NC-L. *iners* CFS vs. control (NYC Broth) followed by cisplatin. 3 experiments, 3 replicates, 2 patient-derived CC-L. *Iners* strains pooled. Mean and SEM are presented. One way ANOVA between each CFS and control shown.
- G. Cell viability (measured by CellTiter Glo) of Ca Ski cells pretreated with CC-L. *iners* cell-free supernatant (CFS) vs. NC-L. *iners* CFS vs. control (NYC Broth) followed by gemcitabine. 3 experiments, 3 replicates, 2 patient-derived CC-L. *Iners* strains pooled. Mean and SEM are presented. One way ANOVA between each CFS and control shown.
- H. Cell viability (measured by CellTiter Glo) of Ca Ski cells pretreated with CC-L. *iners* cell-free supernatant (CFS) vs. NC-L. *iners* CFS vs. control (NYC Broth) followed by 5-Fluorouracil. 4 experiments, 3 replicates, 2 patient-derived CC-L. *Iners* strains pooled. Mean and SEM are presented. One way ANOVA between each CFS and control shown.
- I. Cell viability (measured by CellTiter Glo) of SiHa cells pretreated with CC-L. *iners* cell-free supernatant (CFS) vs. NC-L. *iners* CFS vs. control (NYC Broth) followed by cisplatin. 3 experiments, 3 replicates, 2 patient-derived CC-L. *Iners* strains pooled. Mean and SEM are presented. One way ANOVA between each CFS and control shown.
- J. Cell viability (measured by CellTiter Glo) of SiHa cells pretreated with CC-L. *iners* cell-free supernatant (CFS) vs. NC-L. *iners* CFS vs. control (NYC Broth) followed by gemcitabine. 3 experiments, 3 replicates, 2 patient-derived CC-L. *Iners* strains pooled. Mean and SEM are presented. One way ANOVA between each CFS and control shown.
- K. Cell viability (measured by CellTiter Glo) of SiHa cells pretreated with CC-L. *iners* cell-free supernatant (CFS) vs. NC-L. *iners* CFS vs. control (NYC Broth) followed by 5-Fluorouracil. 2 experiments, 3 replicates, 2 patient-derived CC-L. *Iners* strains pooled. Mean and SEM are presented. One way ANOVA between each CFS and control shown.
- L. Cell viability (measured by CellTiter Glo) of HeLa cells pretreated with CC-L. *iners* cell-free supernatant (CFS) vs. NC-L. *iners* CFS vs. control (NYC Broth) followed by gemcitabine. 3 experiments, 3 replicates, 2 patient-derived CC-L. *Iners* strains pooled. Mean and SEM are presented. One way ANOVA between each CFS and control shown.
- M. Cell viability (measured by CellTiter Glo) of HeLa cells pretreated with CC-L. *iners* cell-free supernatant (CFS) vs. NC-L. *iners* CFS vs. control (NYC Broth) followed by 5-Fluorouracil. 3 experiments, 3 replicates, 2 patient-derived CC-L. *Iners* strains pooled. Mean and SEM are presented. One way ANOVA between each CFS and control shown.
- N. HeLa cells treated with cancer-derived *L. crispatus* CFS, non-cancer derived *L. crispatus* CFS, or NYC broth control at increasing doses of irradiation. 1 experiment, 3 replicates. No statistical comparison made.

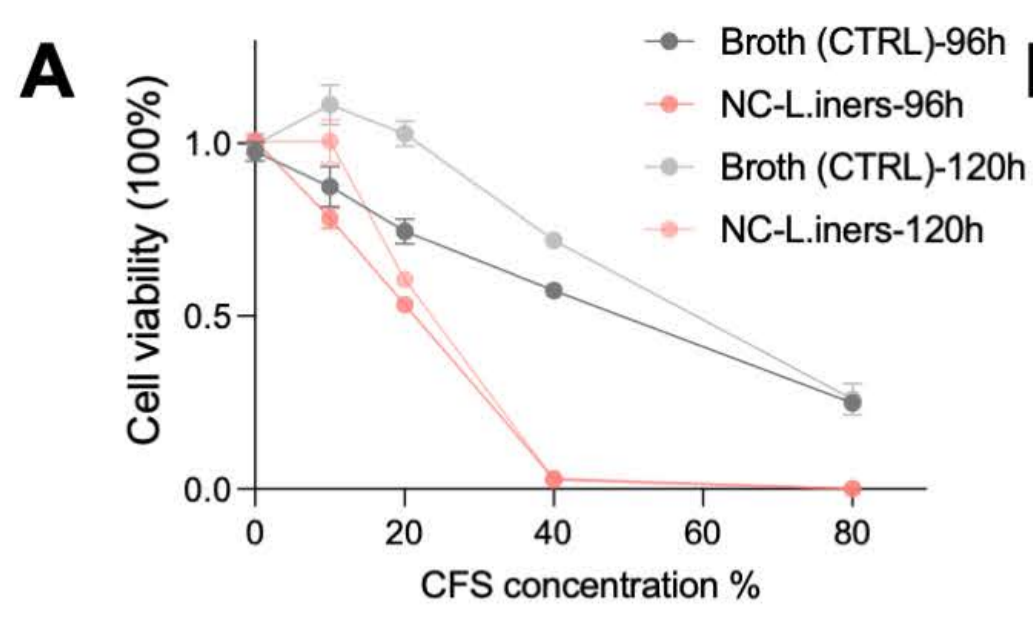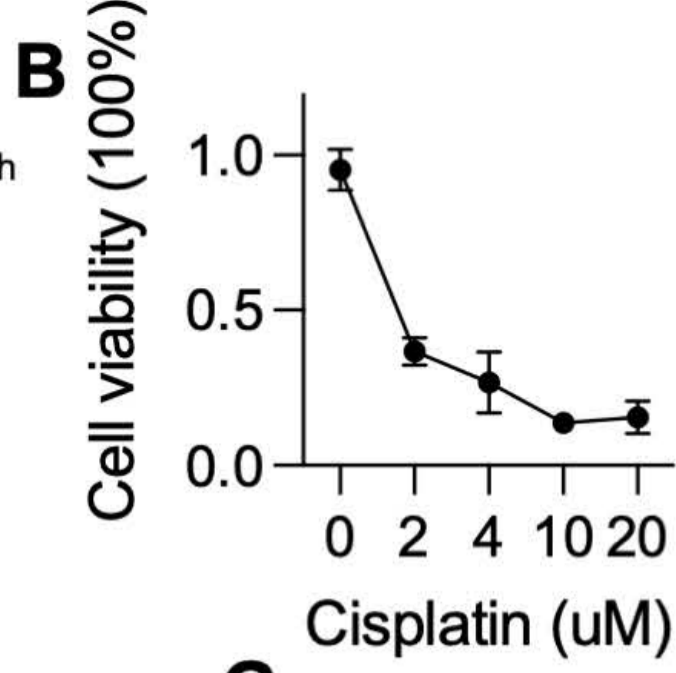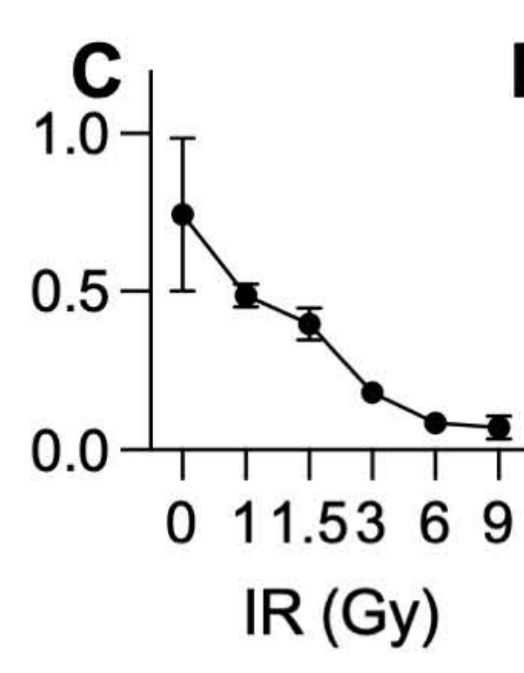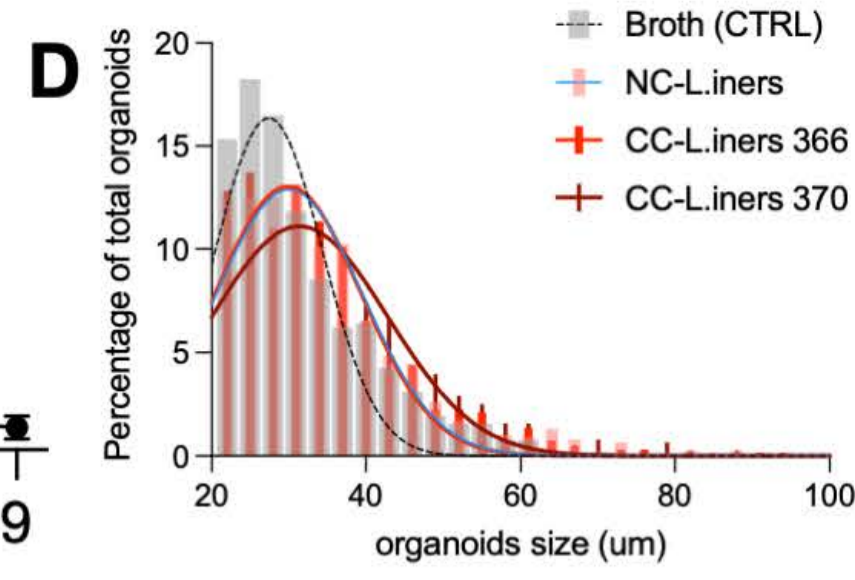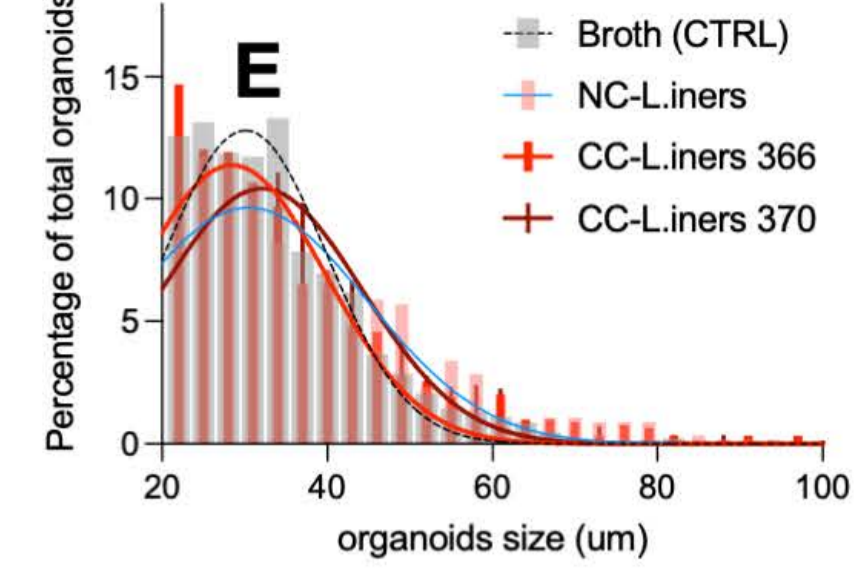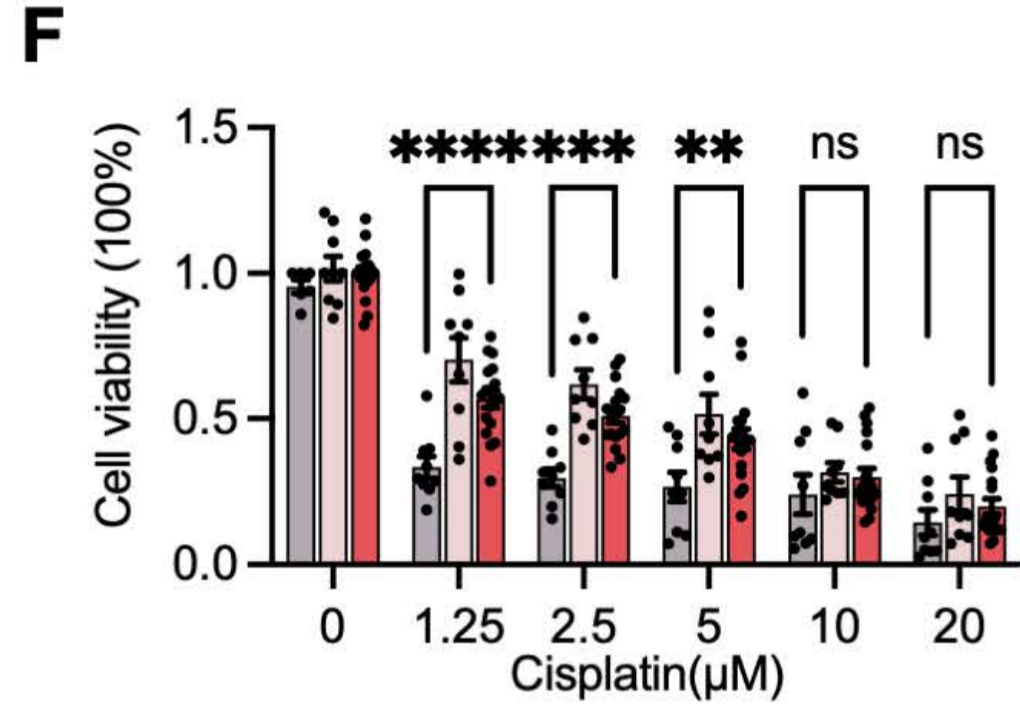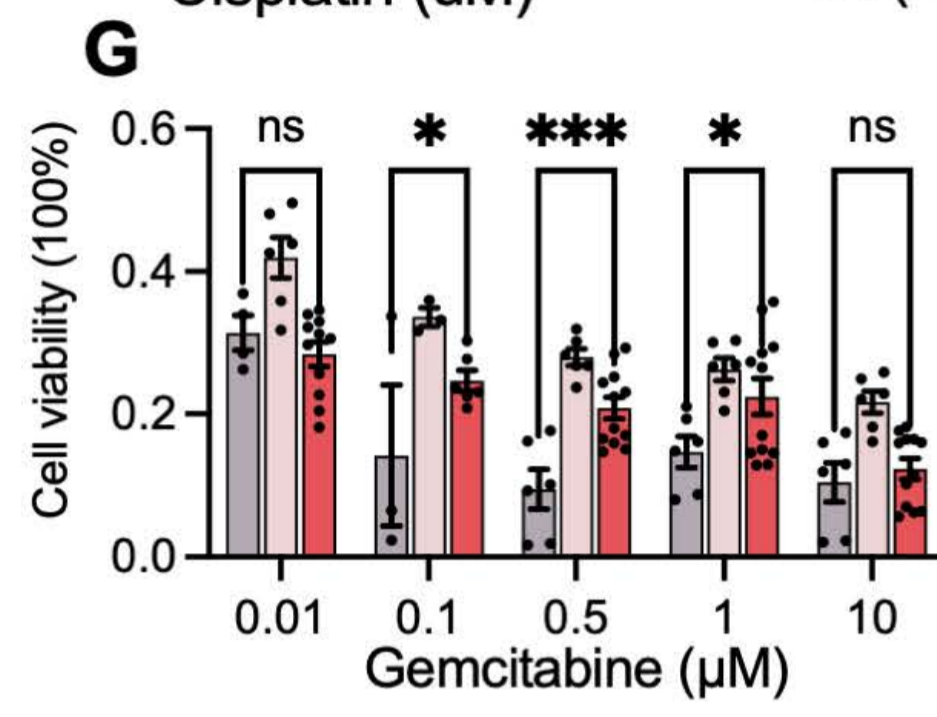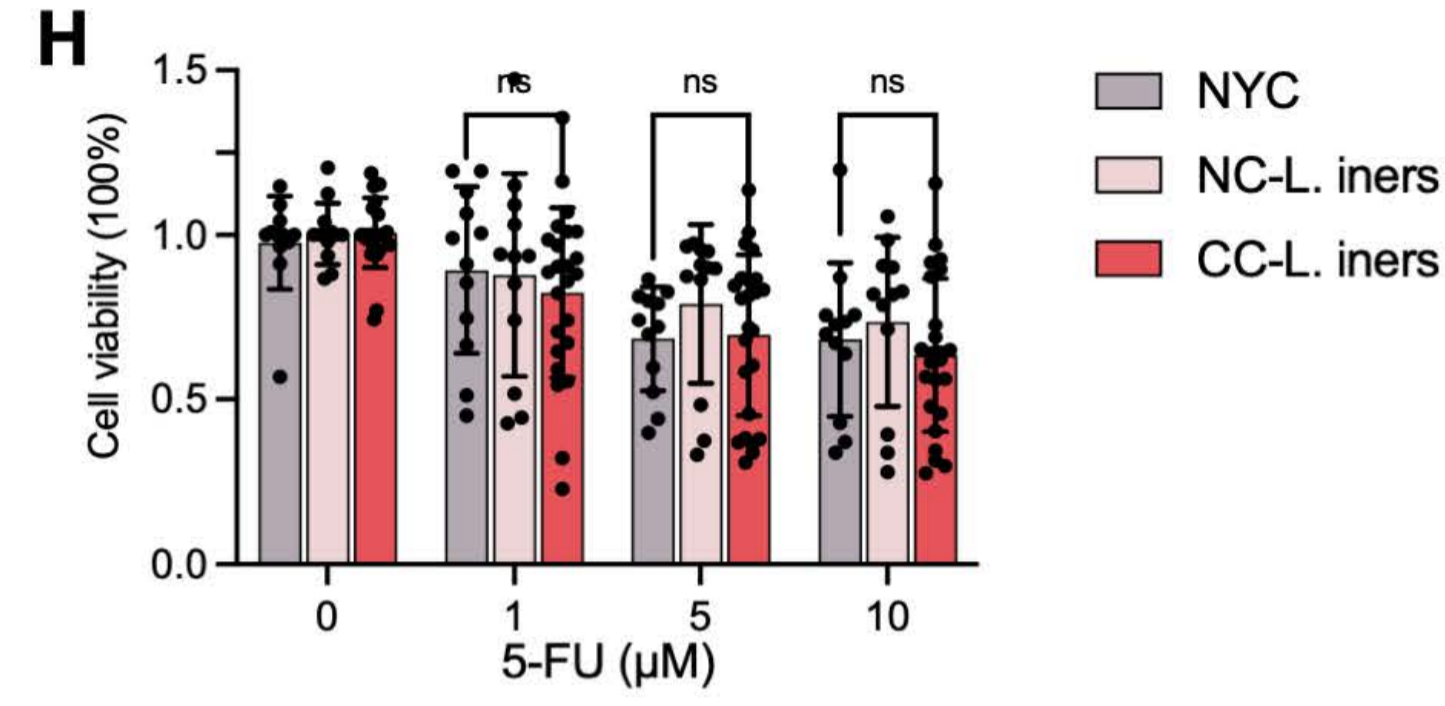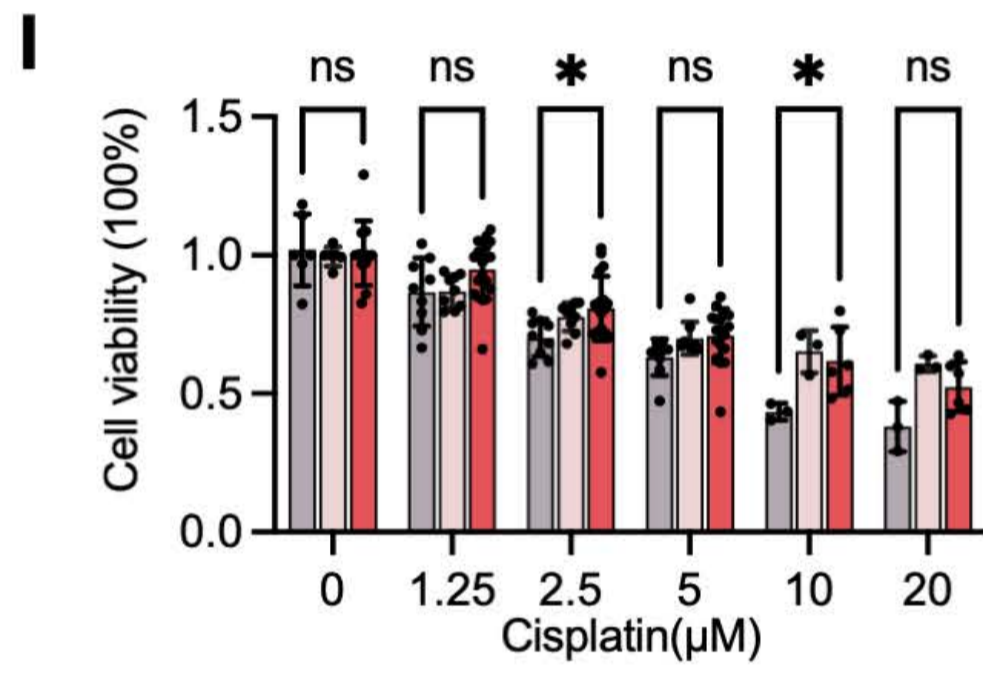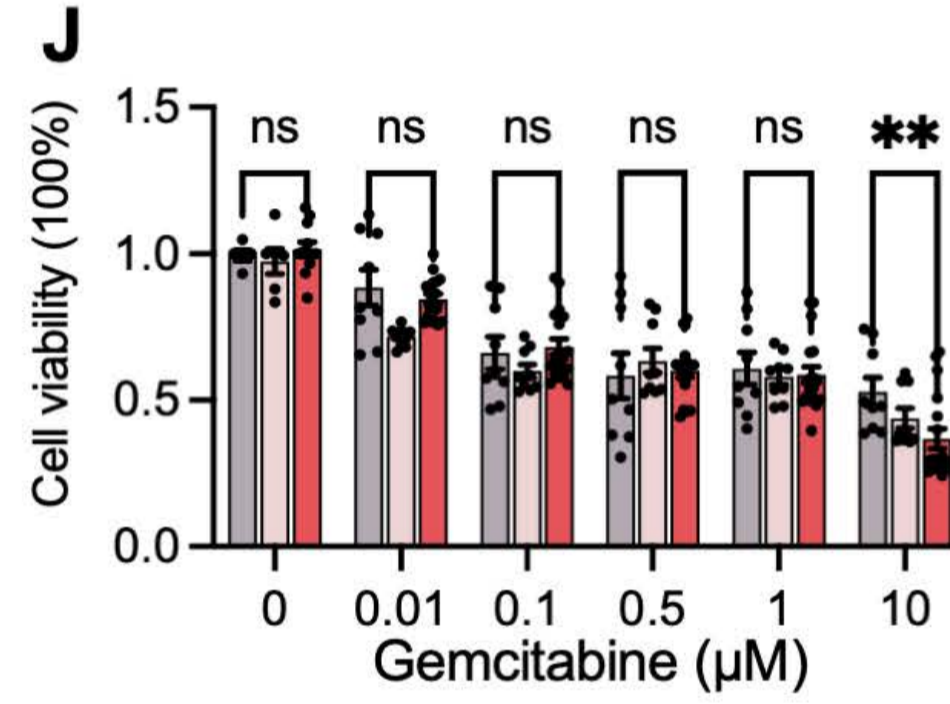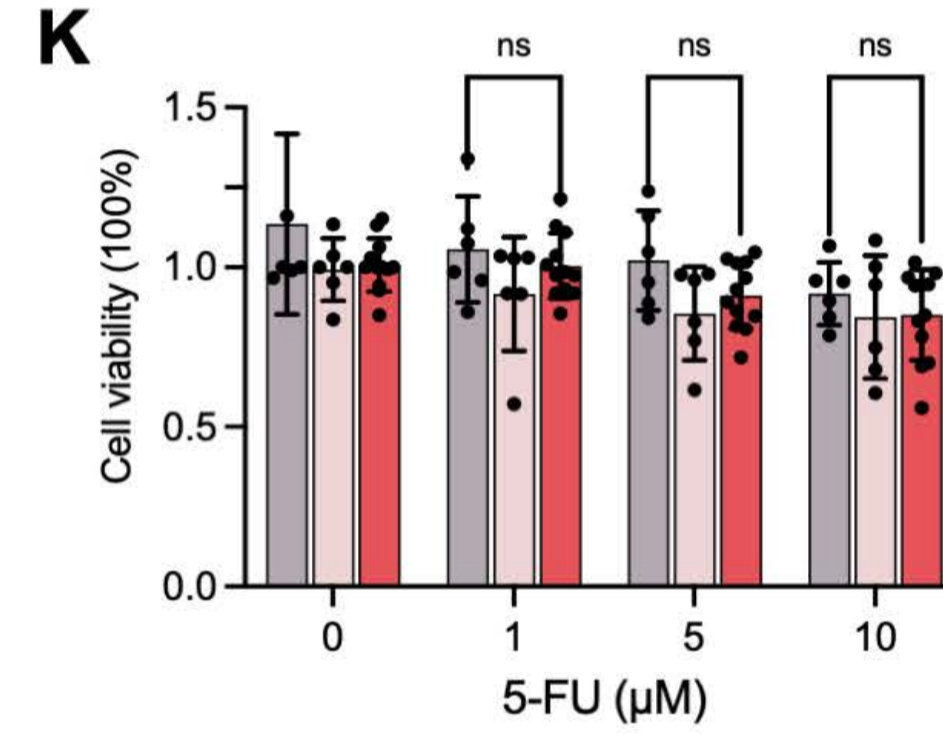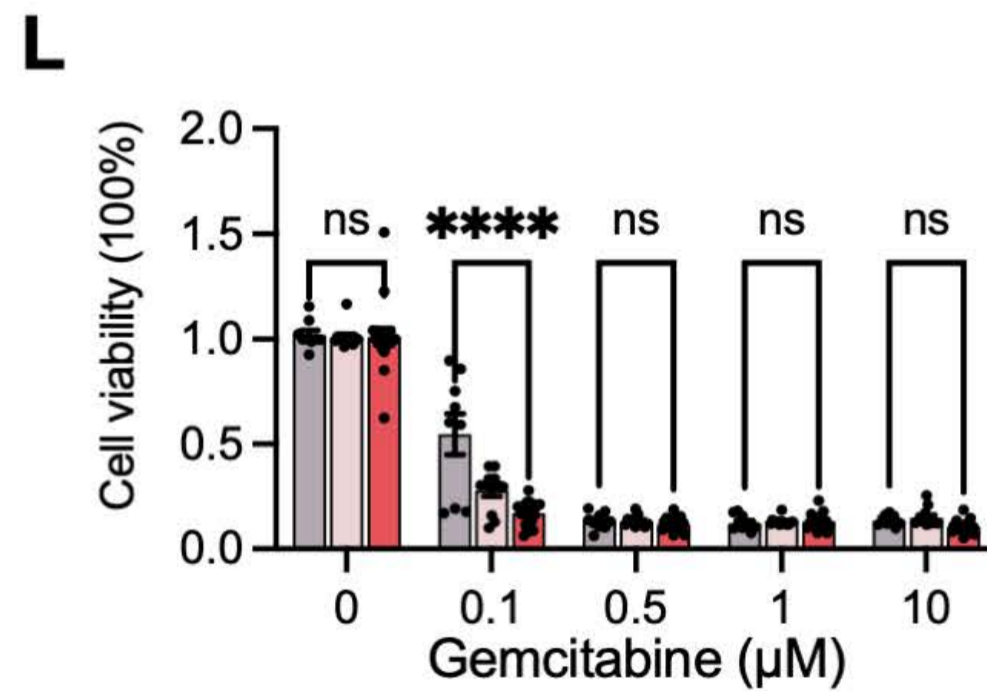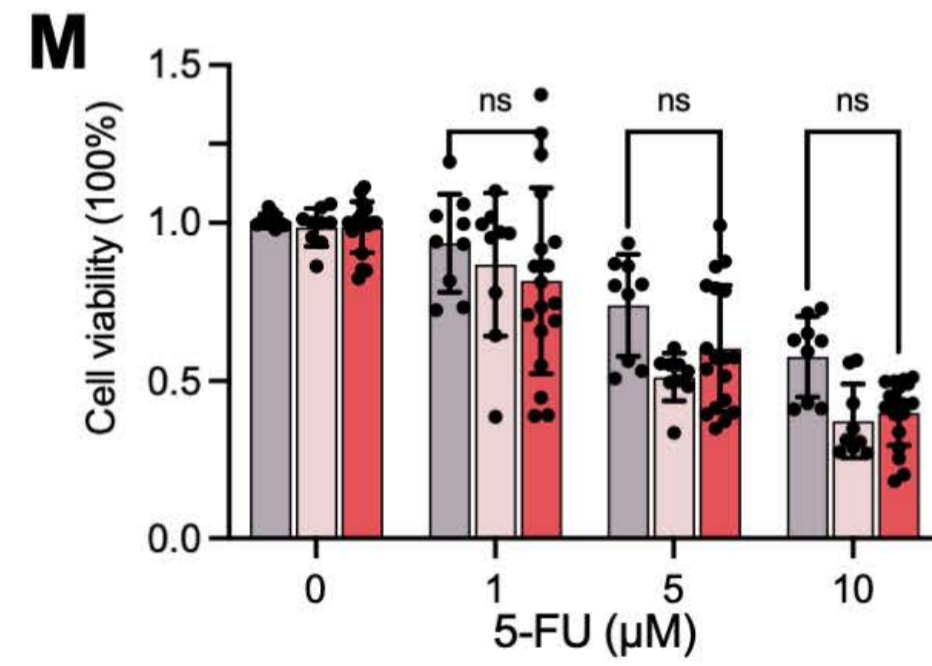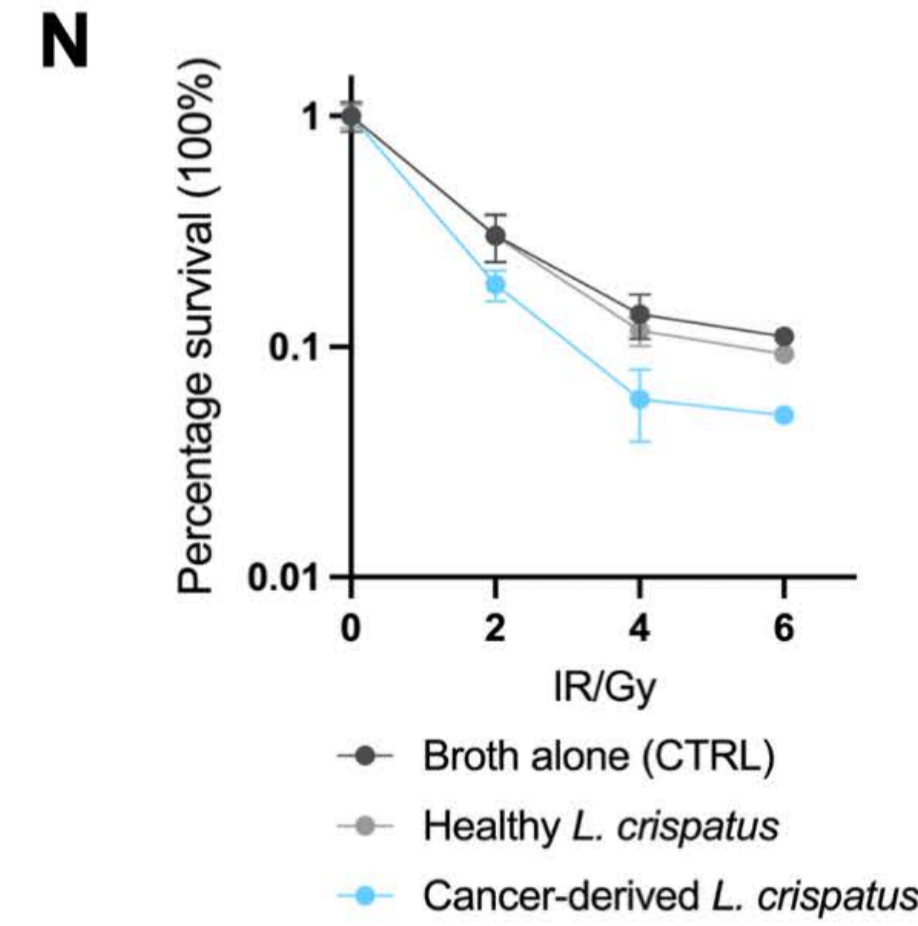

**Supplemental Figure 6. L-lactate causes treatment resistance and lactate signaling pathways are upregulated,** related to Figures 3 and 4.

- A. Hallmark pathways for primary cells B1188 were pre-treated with *L. iners* (1 NC-*L. iners* strain, 2 CC-*L. iners* strains) CFS vs. control (NYC broth) prior to RNA sequencing. Fold change in gene expression from control (right) to *L. iners* (left) is shown. Log<sub>2</sub> (Fold Change) threshold of -1, 1. – Log<sub>10</sub> (FDR- adjusted p-value) threshold is 1.2. 1 experiment, 3 replicates for each group.
- B. Cell viability (measured by CellTiter Glo) of CaSki cells pretreated with lactate isoforms (20mM) prior to being treated with Gem 0.5 μM (1 experiment, 3 replicates) Unpaired t-test for comparison L-lactate to CTRL.
- C. Cell viability (measured by CellTiter Glo) of CaSki cells pretreated with lactate isoforms (20mM) prior to being treated with 5-FU 1μM (1 experiment, 3 replicates) Unpaired t-test for comparison L-lactate to CTRL.
- D. Cell viability (measured by CellTiter Glo) of CaSki cells pretreated with lactate isoforms (20mM) prior to being treated with IR 3.0 gy (1 experiment, 3 replicates) Unpaired t- for comparison L-lactate to CTRL.
- E. Cell viability (measured by CellTiter Glo) of primary cells B1188 pretreated with lactate isoforms (20mM) prior to being treated with 8 uM Cisplatin (3 experiment, 3 replicates) unpaired t-test for comparison L-lactate to CTRL.
- F. Principle coordinate analysis (PCA) of non-targeted metabolomics for validation cohort. DSC p-value shown.
- G. Supervised clustering of metabolites for *L. iners*+ and *L. iners*- tumors in validation cohort, with assigned pathways. N=29. No statistical comparison.
- H. Unsupervised clustering of metabolites for CFS alone in validation cohort, with assigned lactate regulated pathways. NS  $P > 0.05$ , \* $P \leq 0.05$ , \*\*  $P \leq 0.01$ , \*\*\*  $P \leq 0.001$ , \*\*\*\*  $P \leq 0.0001$ .



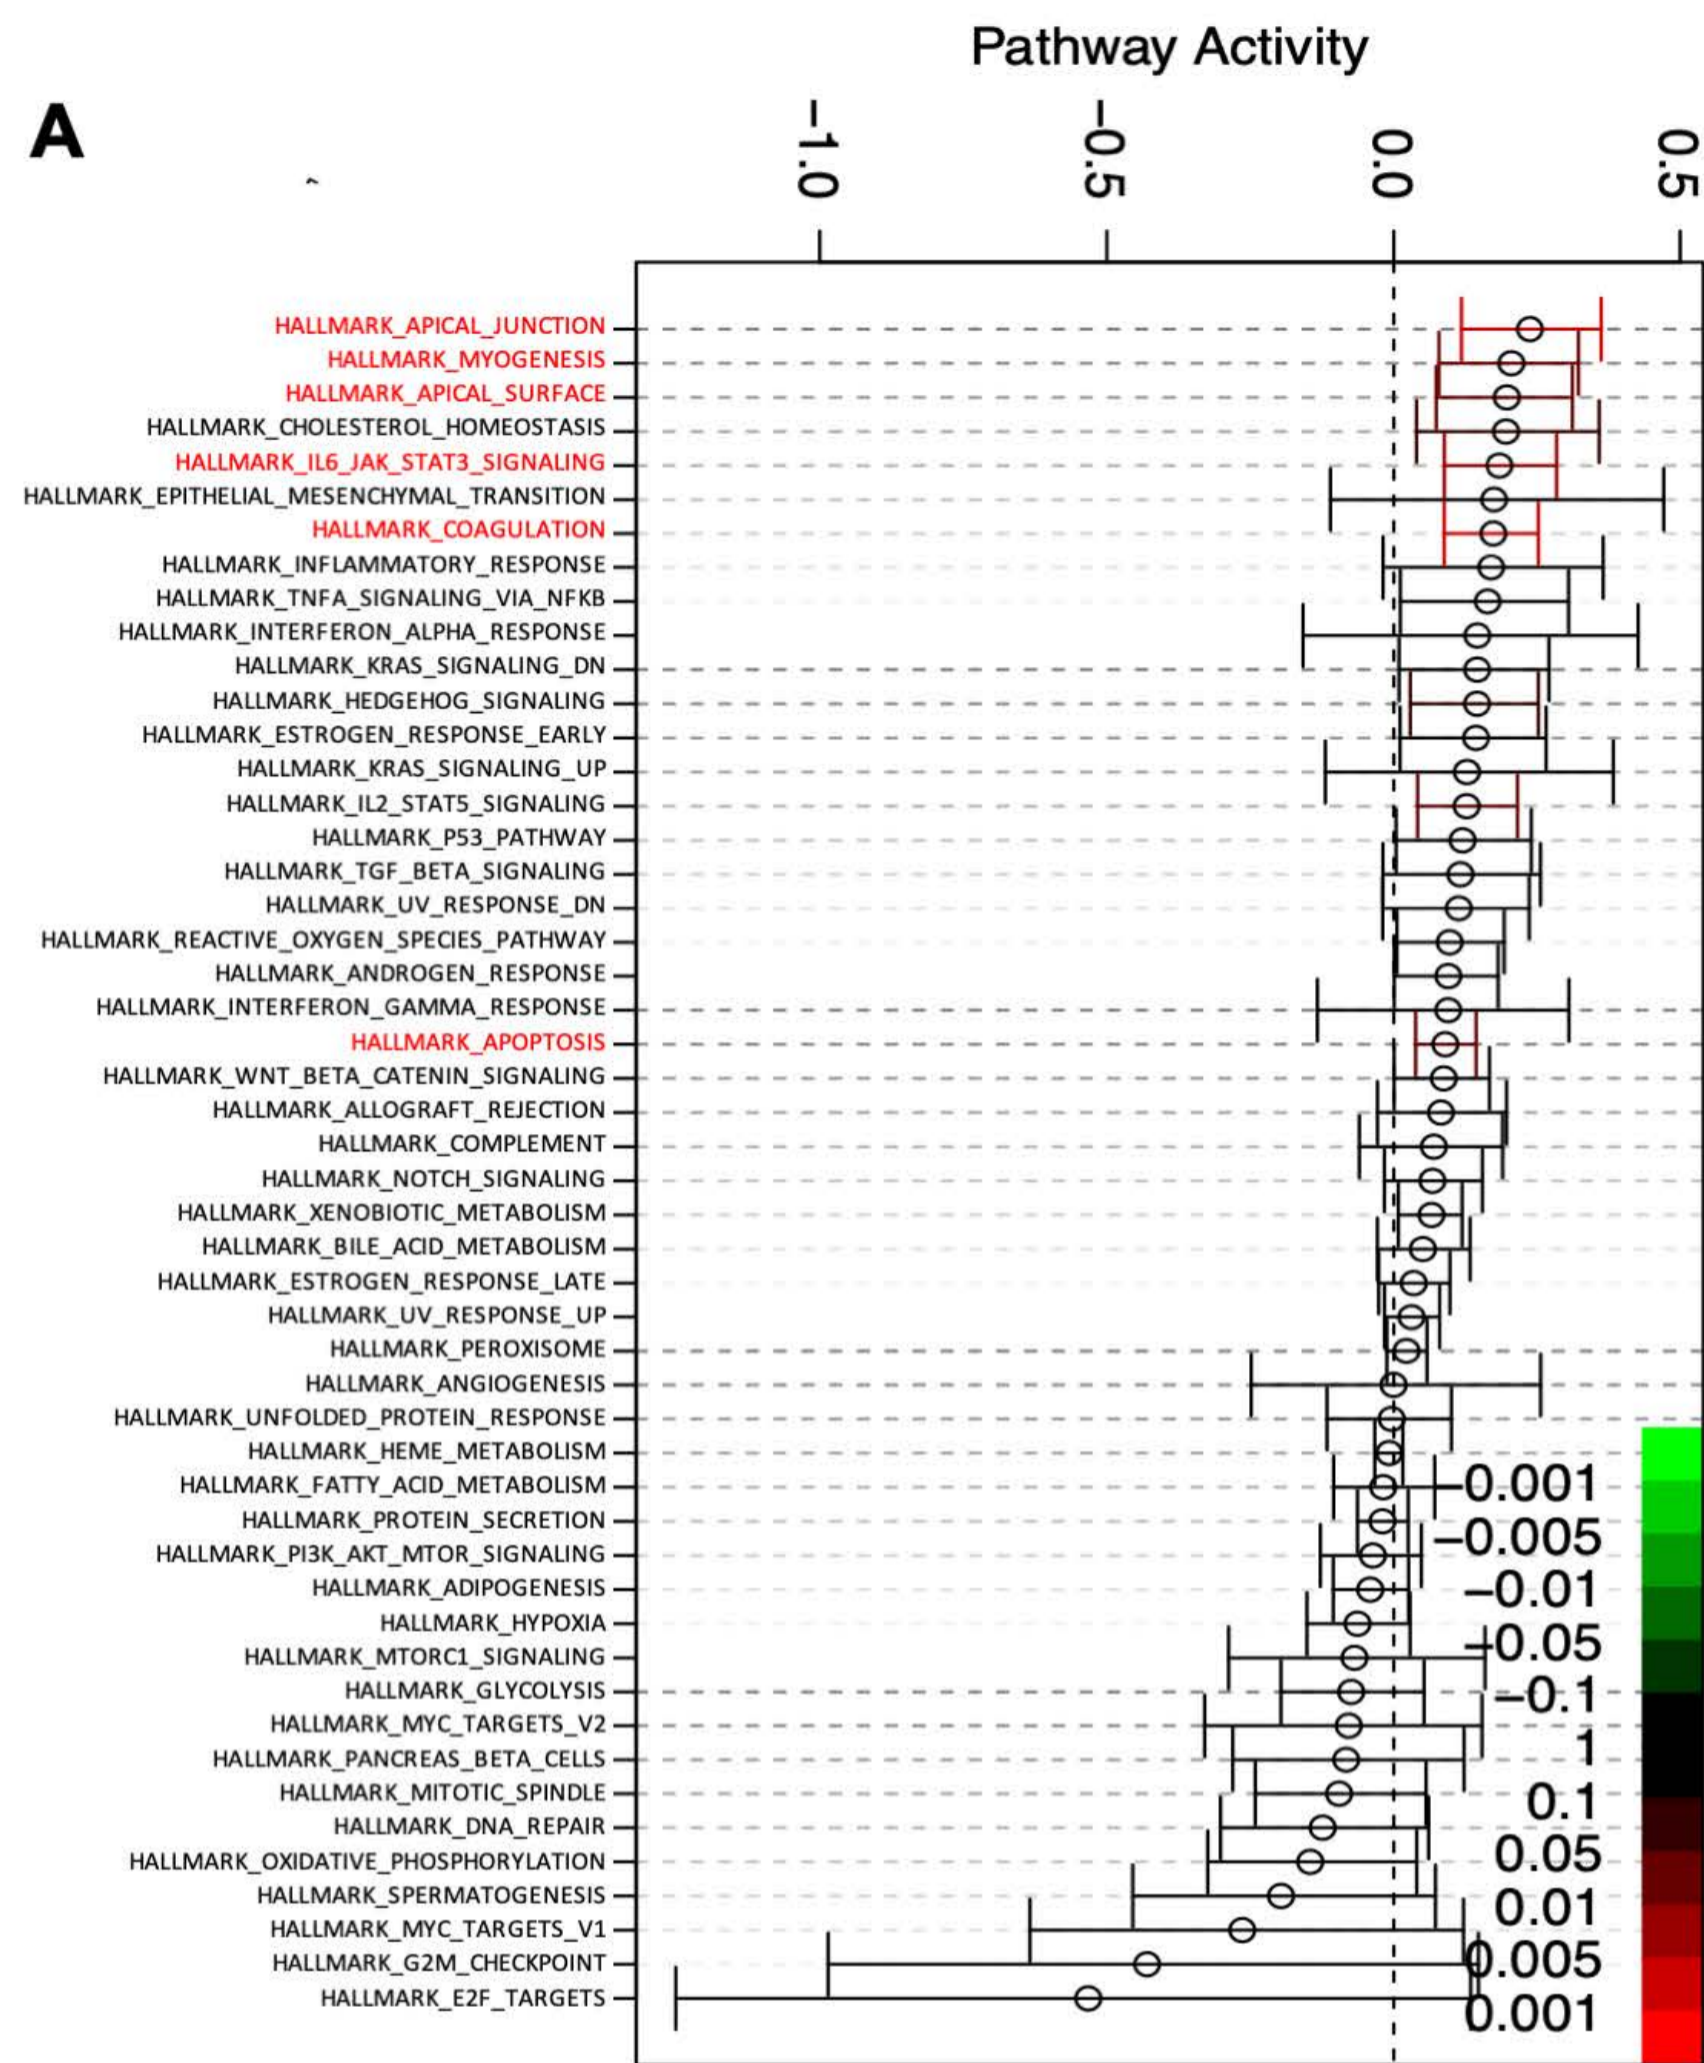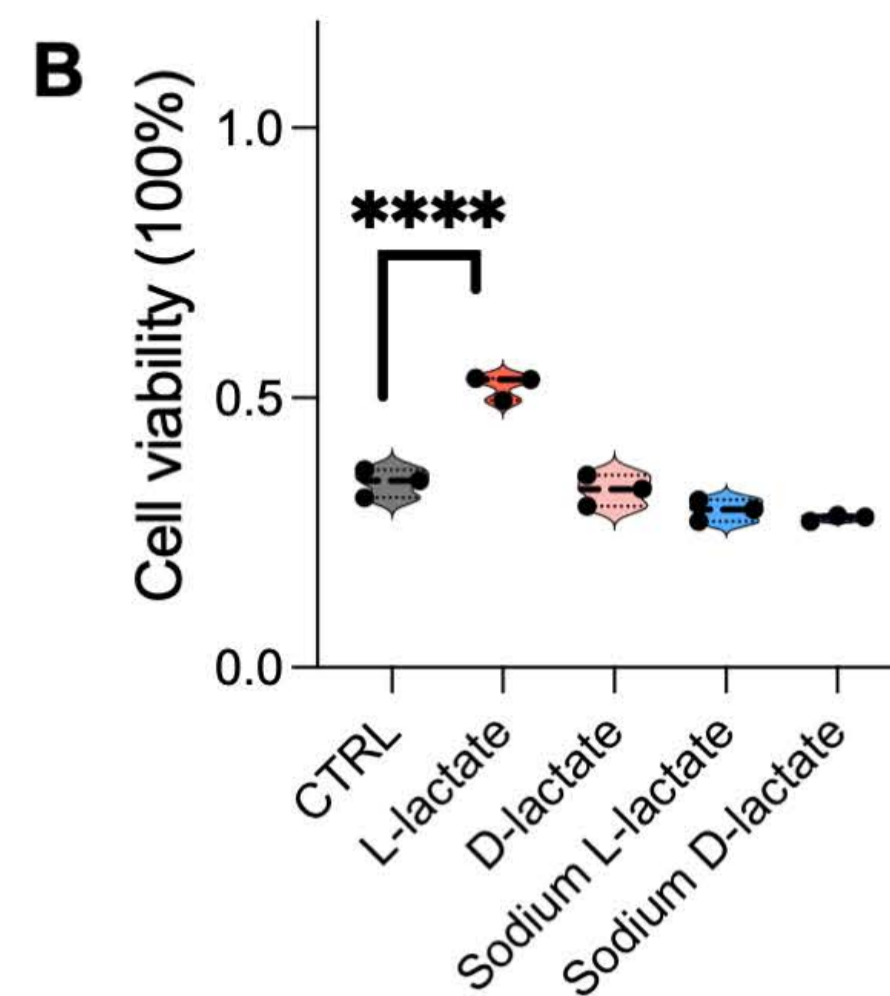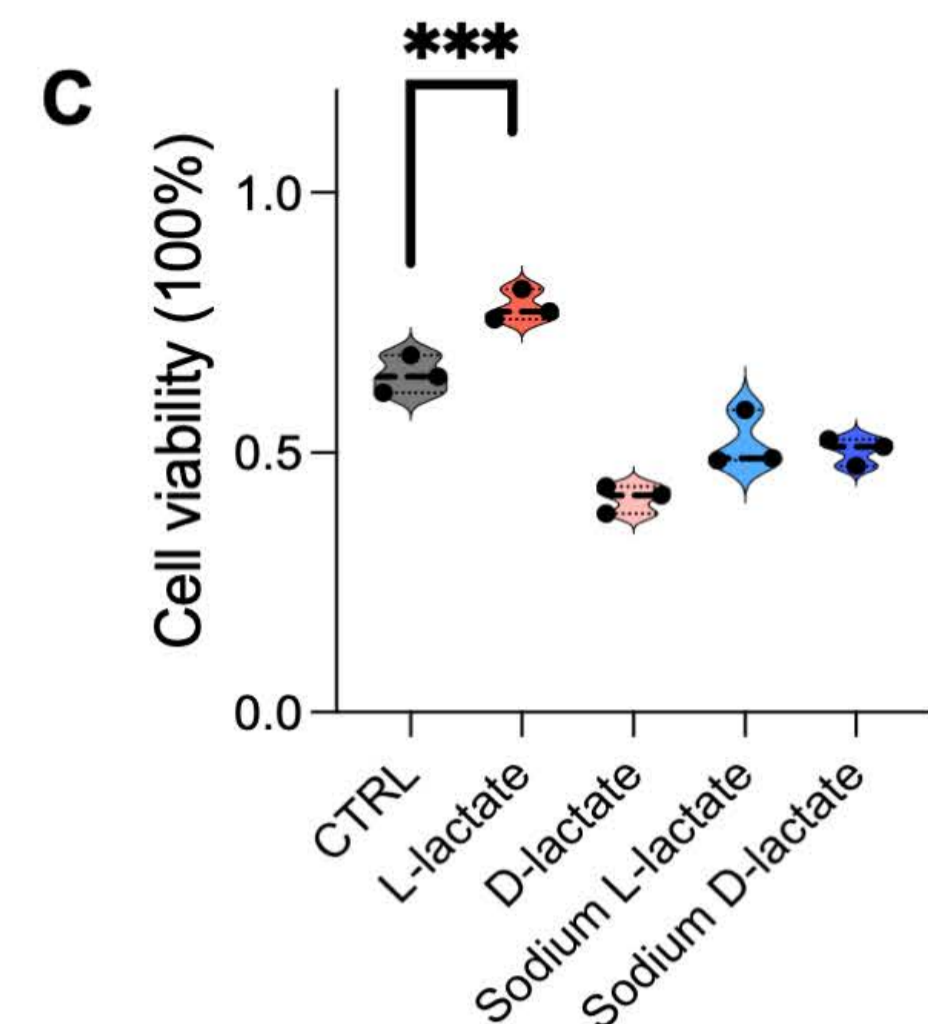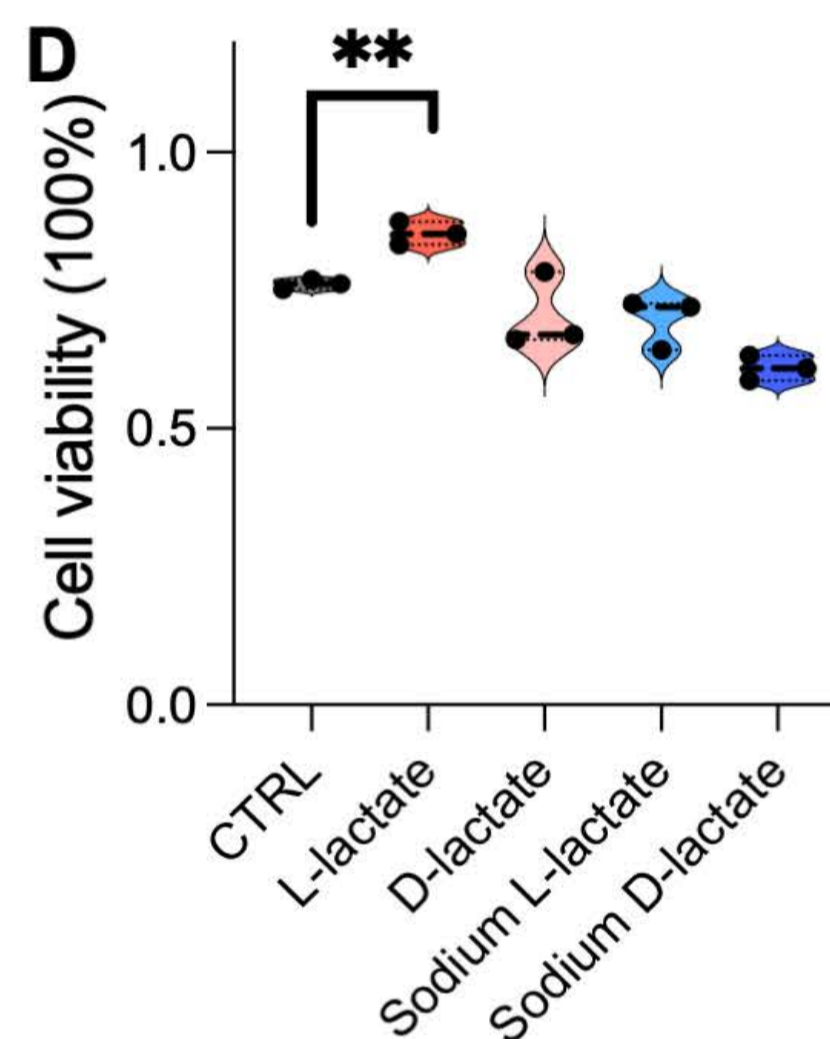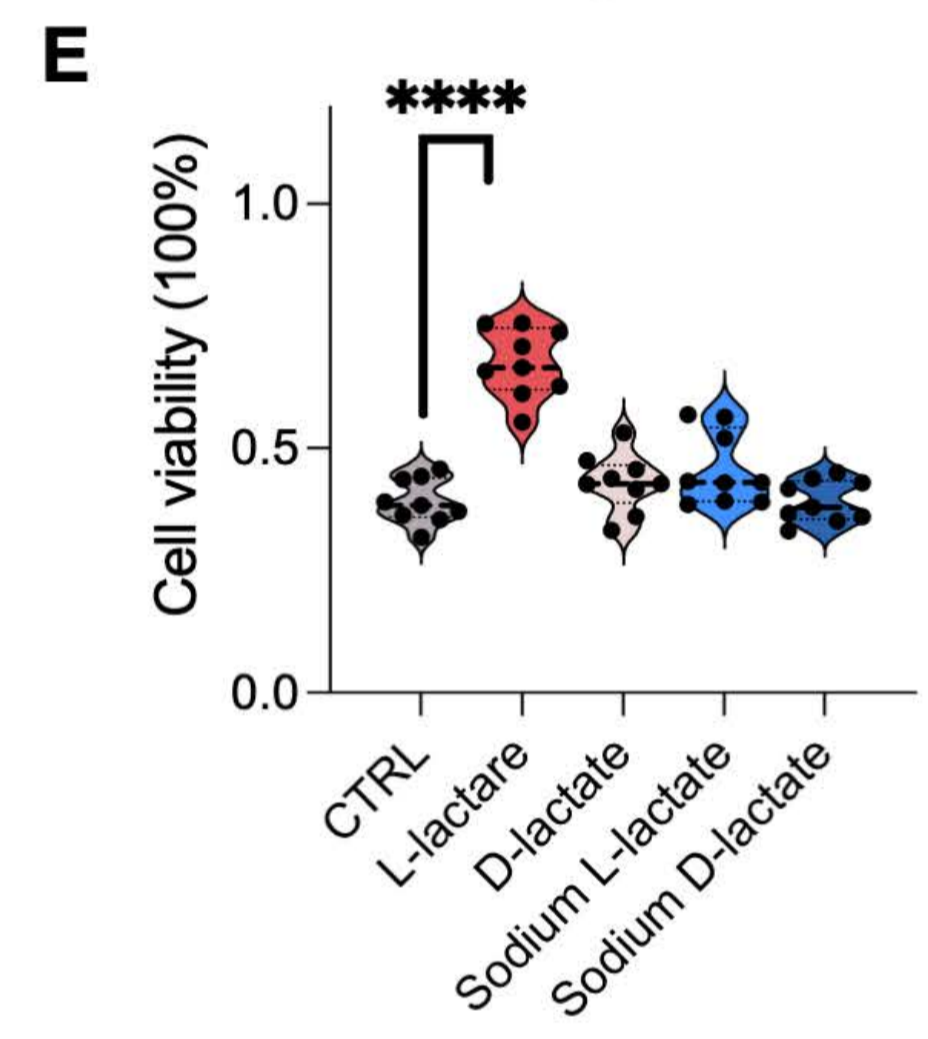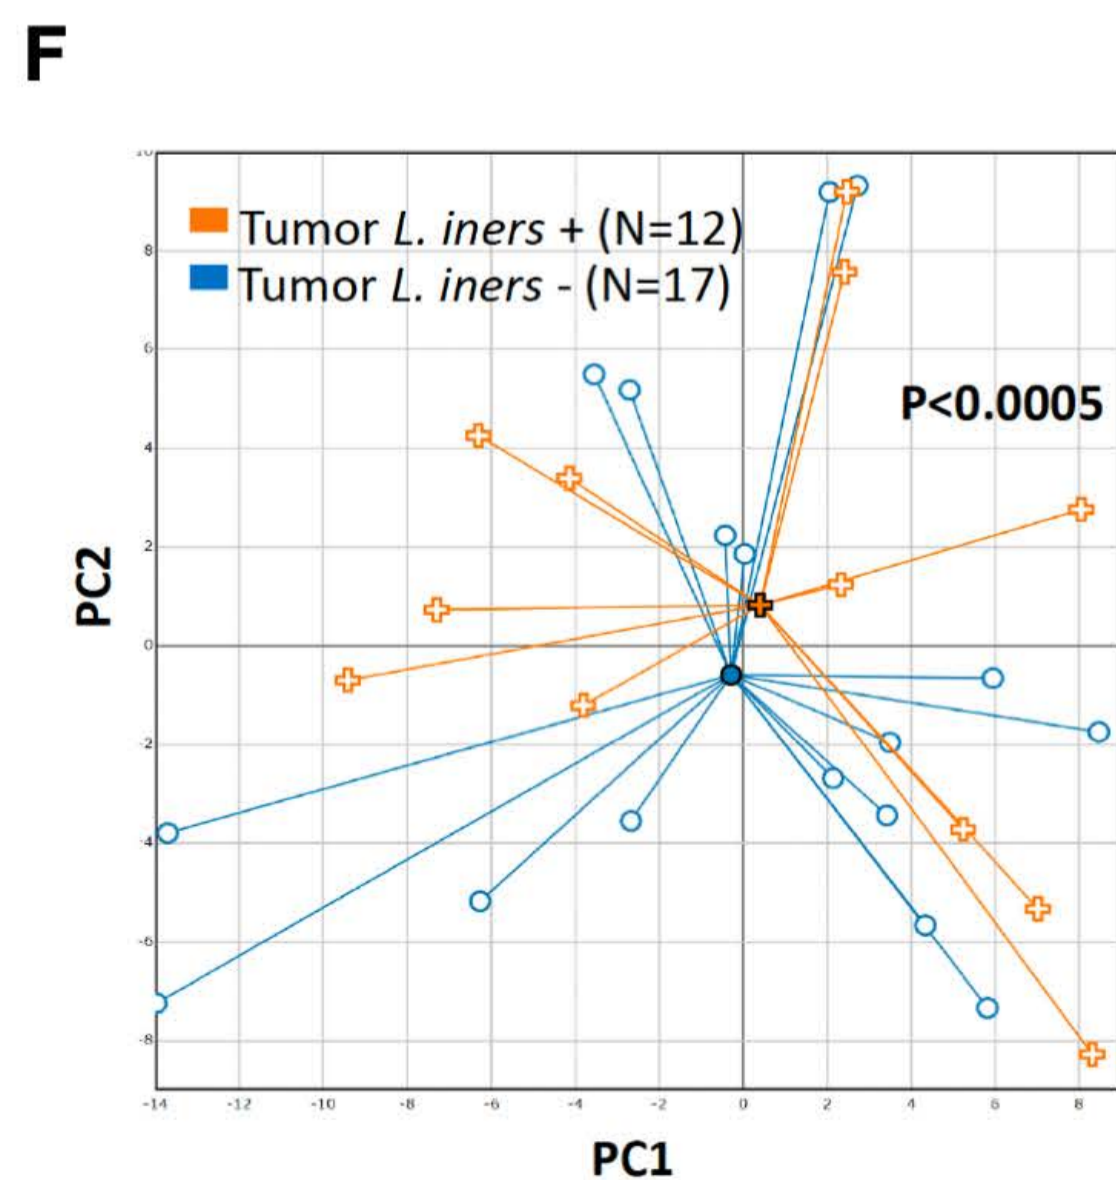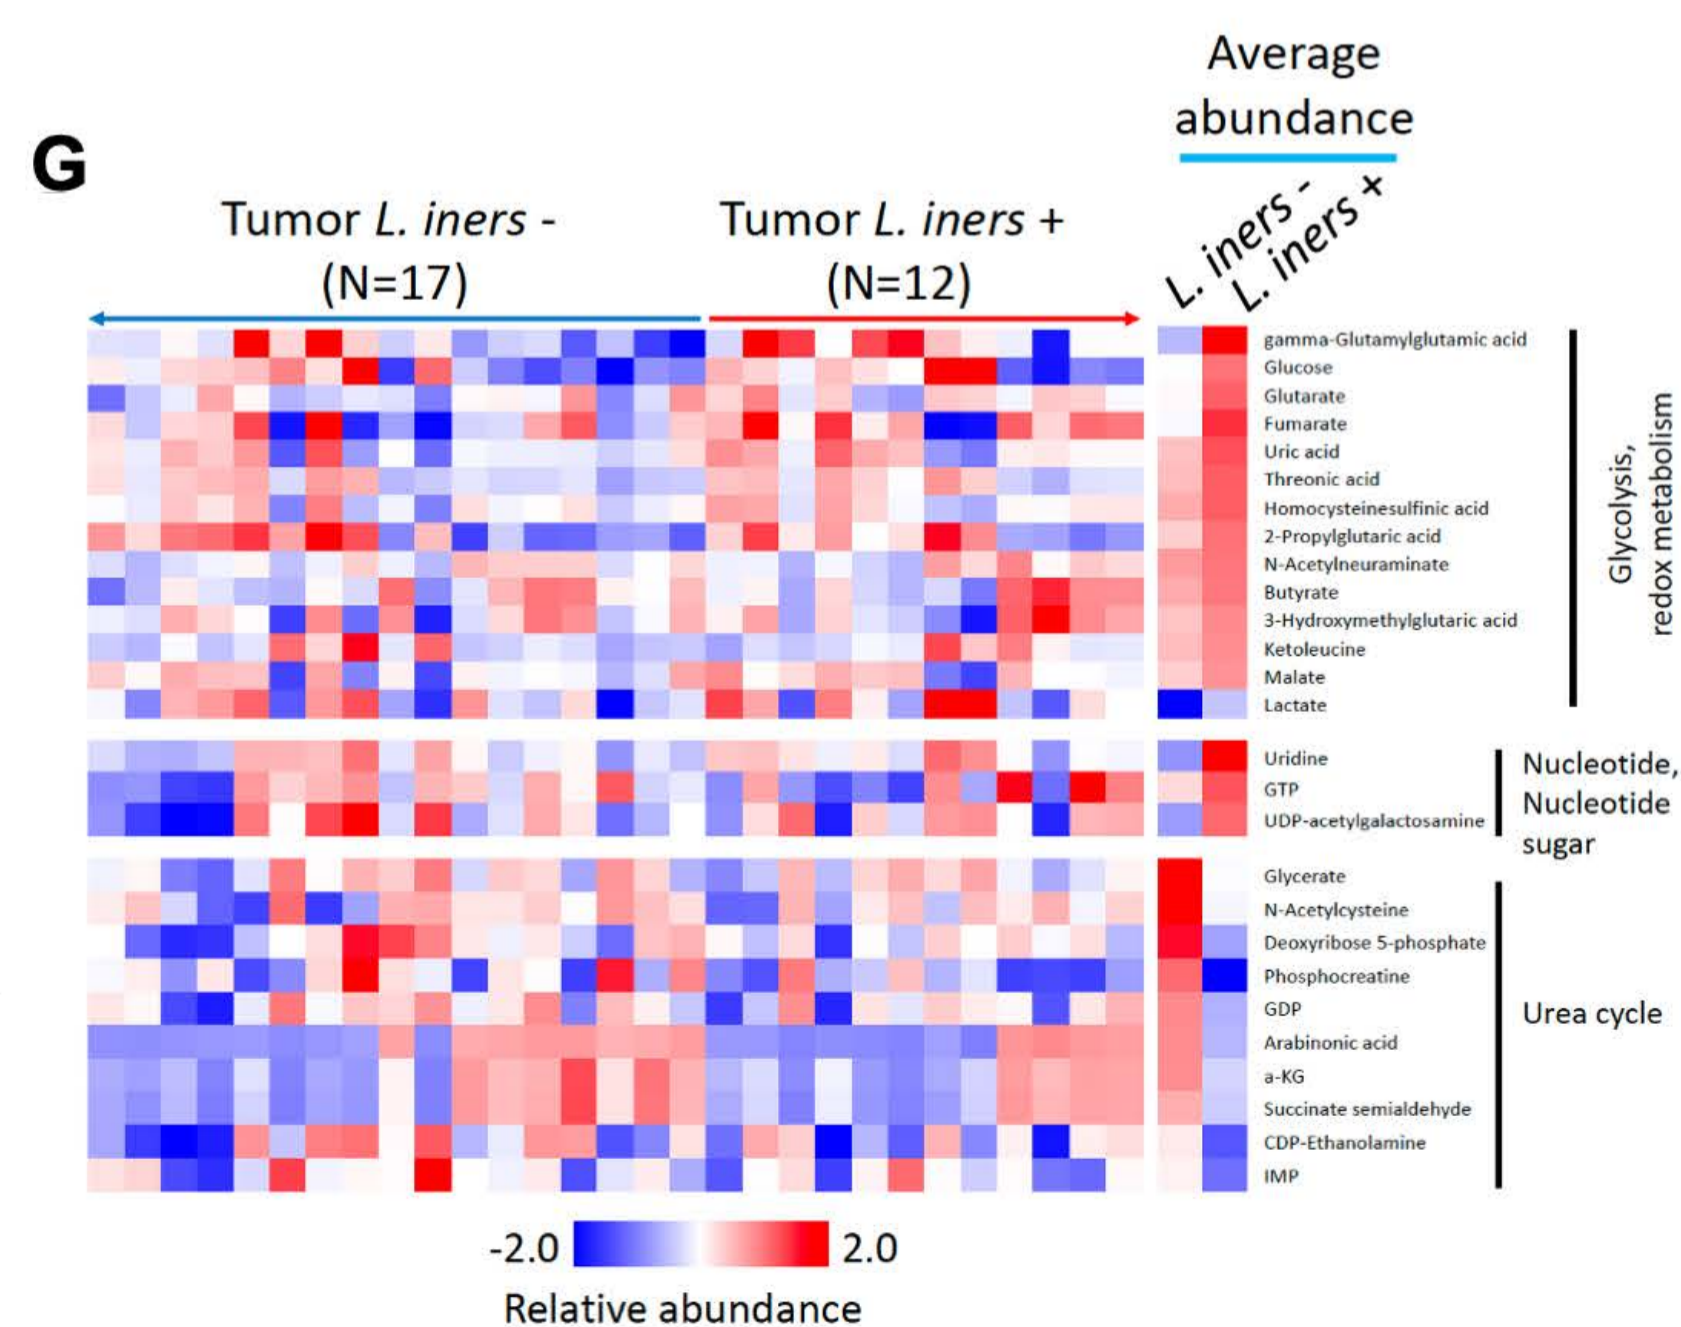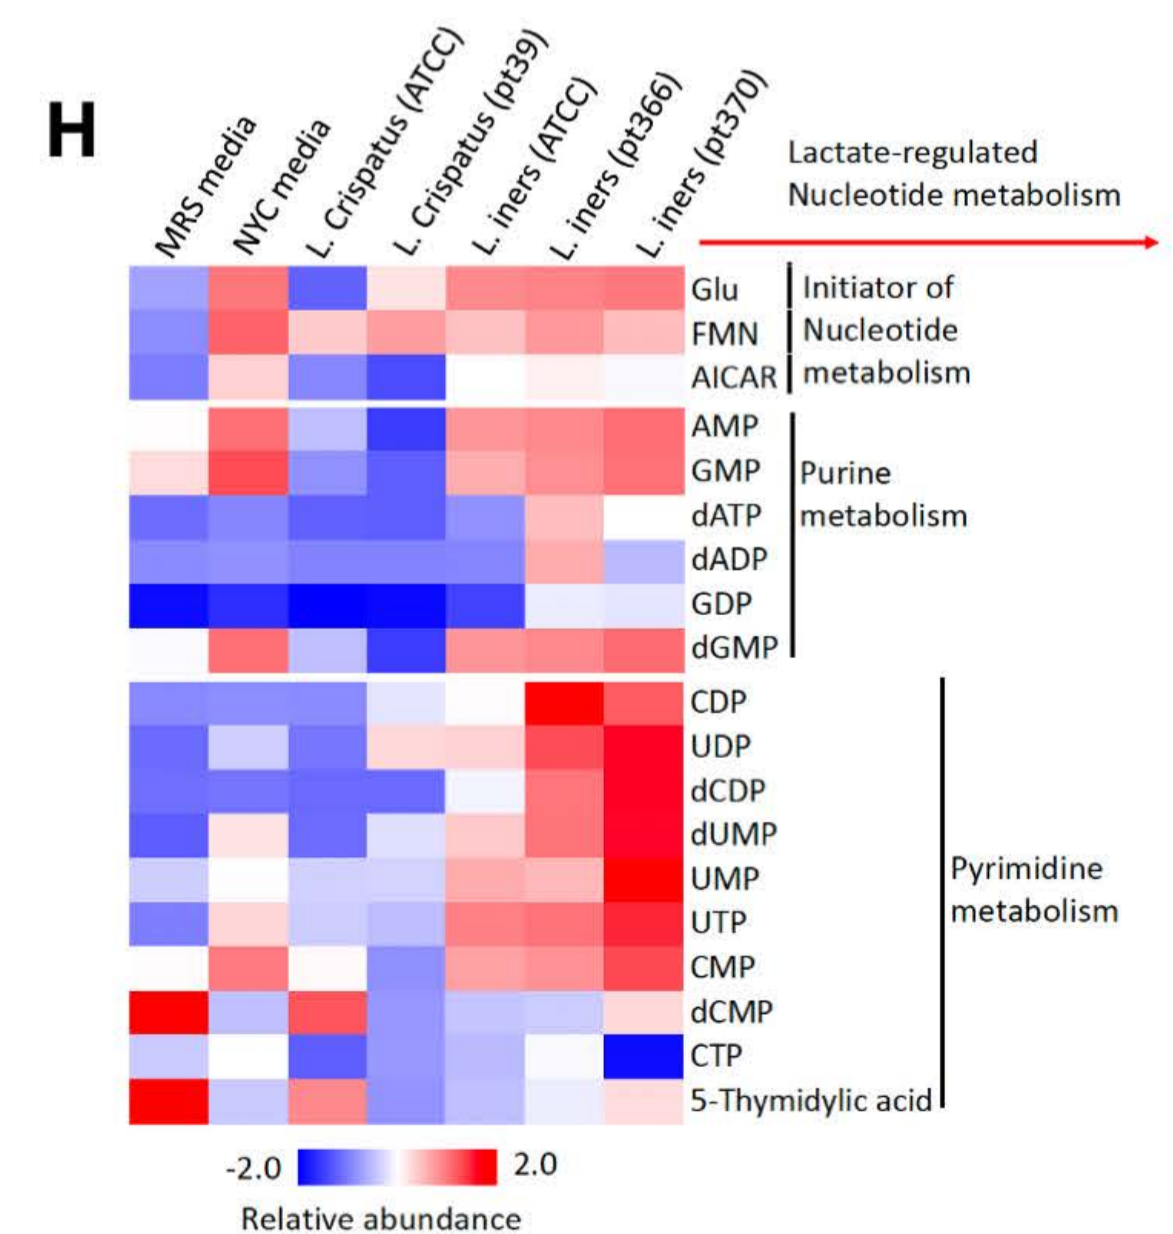

**Supplementary Figure 7. Unique genomic features of CC-L. iners vs. NC-L. iners may be responsible for differing effects on cancer gene expression, related to Figure 6.**

- A. Number of genes in Lactobacillus pangenome from Shotgun metagenome sequencing of tumor swabs, with those assigned to *L. iners* (blue) vs. other Lactobacilli (orange).
- B. KEGG orthology molecular functions specific for cervical cancer *L. iners* not identified in healthy *L. iners* are common across different patients and associated with bacterial immunity and pathogenic phenotypes, R-M: Restriction-modification system; PTS: PhosphoTransferase System; TA: Toxin-antitoxin system.
- C. KEGG orthology pathways for cancer-derived *L. iners* are differentially identified vs. healthy *L. iners*.
- D. Fully assembled genome for one CC-*L. iners* isolate.
- E. Primary cells B1188 were pre-treated with NC-*L. iners* CFS (1 NC-*L. iners* strain) vs. CC-*L. iners* CFS (2 strains) prior to RNA sequencing. Fold change in gene expression from NC-*L. iners* CFS (right) to CC-*L. iners* CFS (left) is shown. Log<sub>2</sub> (Fold Change) threshold of -1, 1. -Log<sub>10</sub> (FDR-adjusted p-value) threshold is 1.2. 1 experiment, 3 replicates for each group.
- F. Hallmark pathways for unirradiated primary cells B1188 pre-treated with NC-*L. iners* (1 NC-*L. iners* strain) CFS vs. CC-*L. iners* (2 strains) CFS prior to RNA sequencing. Fold change in gene expression from NC-*L. iners* (right) CFS to CC-*L. iners* (left) CFS is shown. Log<sub>2</sub> (Fold Change) threshold of -1, 1. -Log<sub>10</sub> (FDR-adjusted p-value) threshold is 1.2. 1 experiment, 3 replicates for each group.
- G. Hallmark pathways for irradiated (8Gy) primary cells B1188 pre-treated with NC-*L. iners* (1 NC-*L. iners* strain) CFS vs. CC-*L. iners* (2 strains) CFS prior to RNA sequencing. Fold change in gene expression from NC-*L. iners* (right) CFS to CC-*L. iners* (left) CFS is shown. Log<sub>2</sub> (Fold Change) threshold of -1, 1. -Log<sub>10</sub> (FDR-adjusted p-value) threshold is 1.2. 1 experiment, 3 replicates for each group.

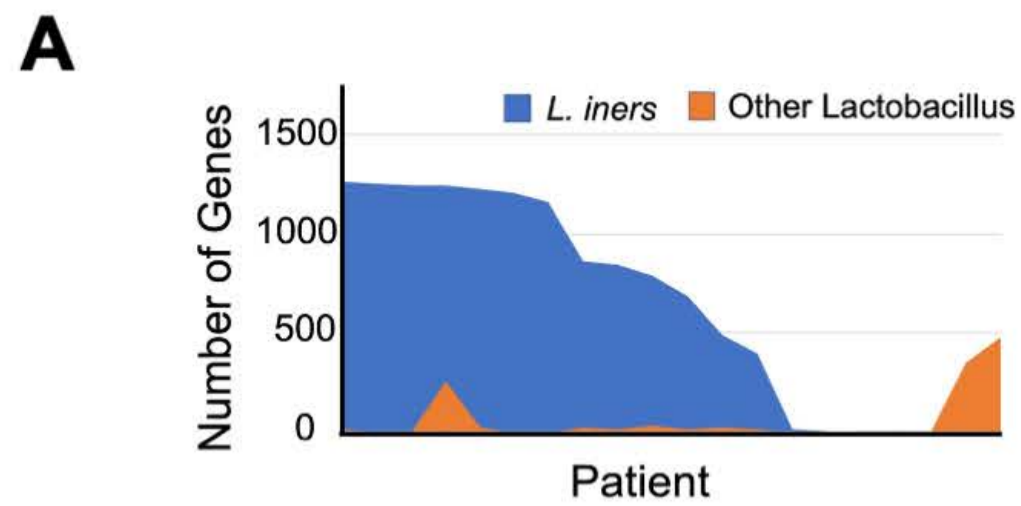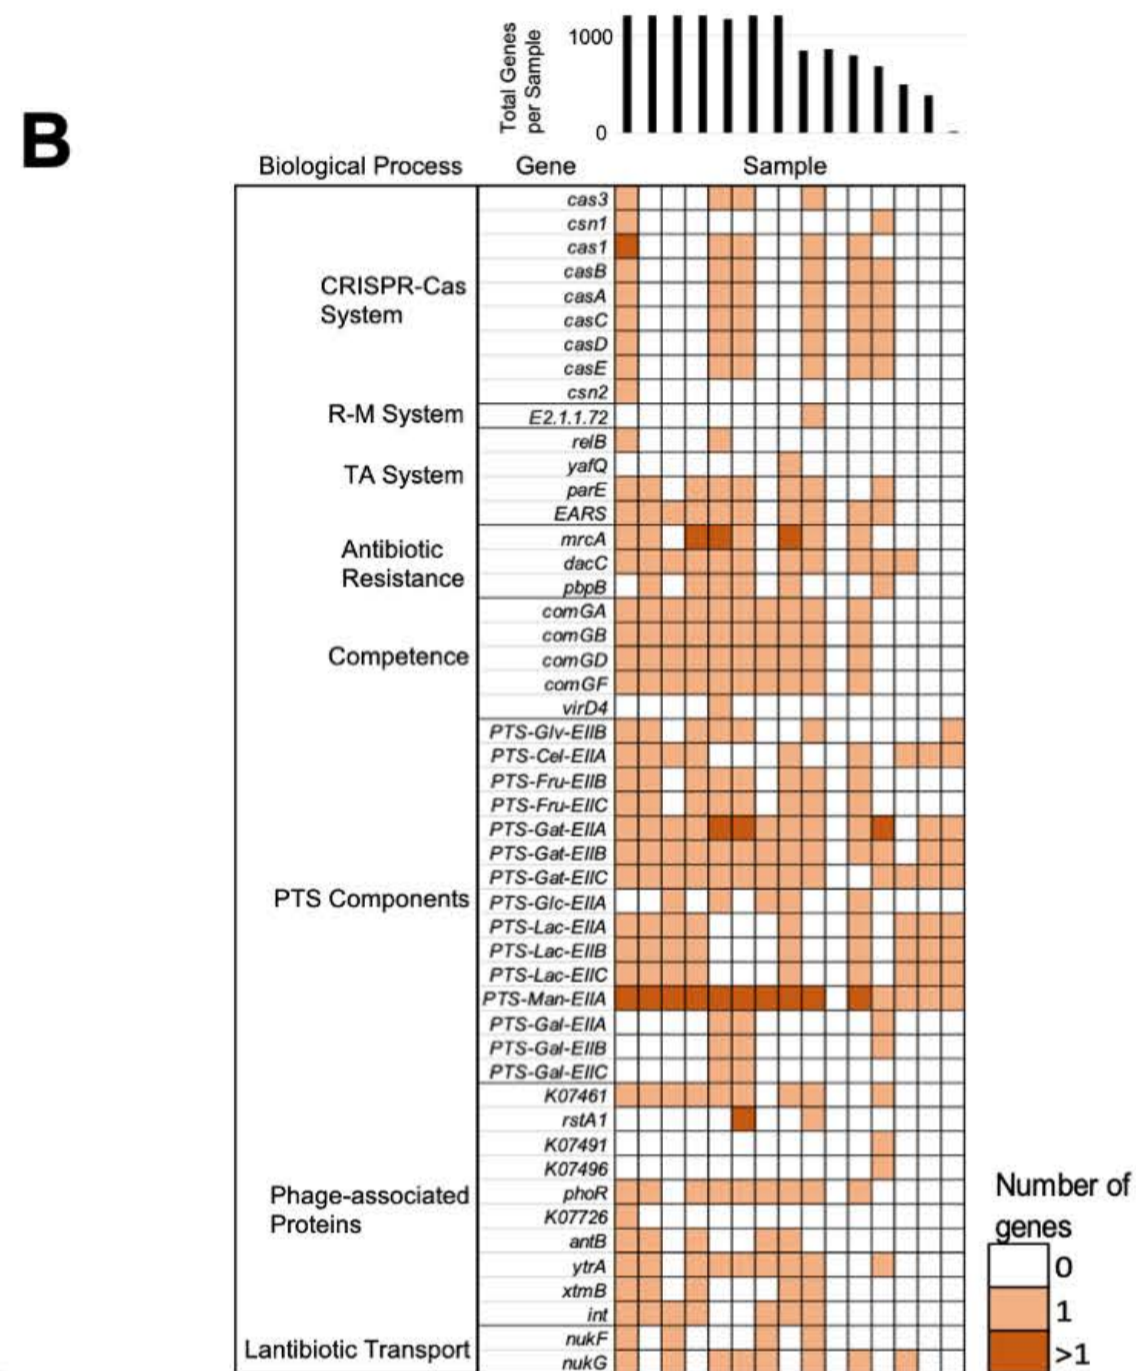

**C**

| Gene        | Function                                                     | Samples |
|-------------|--------------------------------------------------------------|---------|
| <i>malL</i> | oligo-1,6-galactosidase [EC:3.2.1.10]                        |         |
| <i>lacG</i> | 6-phospho-beta-galactosidase [EC:3.2.1.85]                   |         |
| <i>lacD</i> | tagatose 1,6-diphosphate aldolase [EC:4.1.2.40]              |         |
| <i>lacA</i> | galactose-6-phosphate isomerase [EC:5.3.1.26]                |         |
| <i>agaS</i> | tagatose-6-phosphate ketose/aldose isomerase [EC:5.1.3.1]    |         |
| <i>gatA</i> | PTS system, galactitol-specific IIA component [EC:2.7.1.200] |         |
| <i>gatB</i> | PTS system, galactitol-specific IIB component [EC:2.7.1.200] |         |
| <i>gatC</i> | PTS system, galactitol-specific IIC component                |         |
| <i>lacF</i> | PTS system, lactose-specific IIA component [EC:2.7.1.207]    |         |
| <i>lacE</i> | PTS system, lactose-specific IIC component                   |         |

Number of genes

■ 0 ■ 1 ■ >1

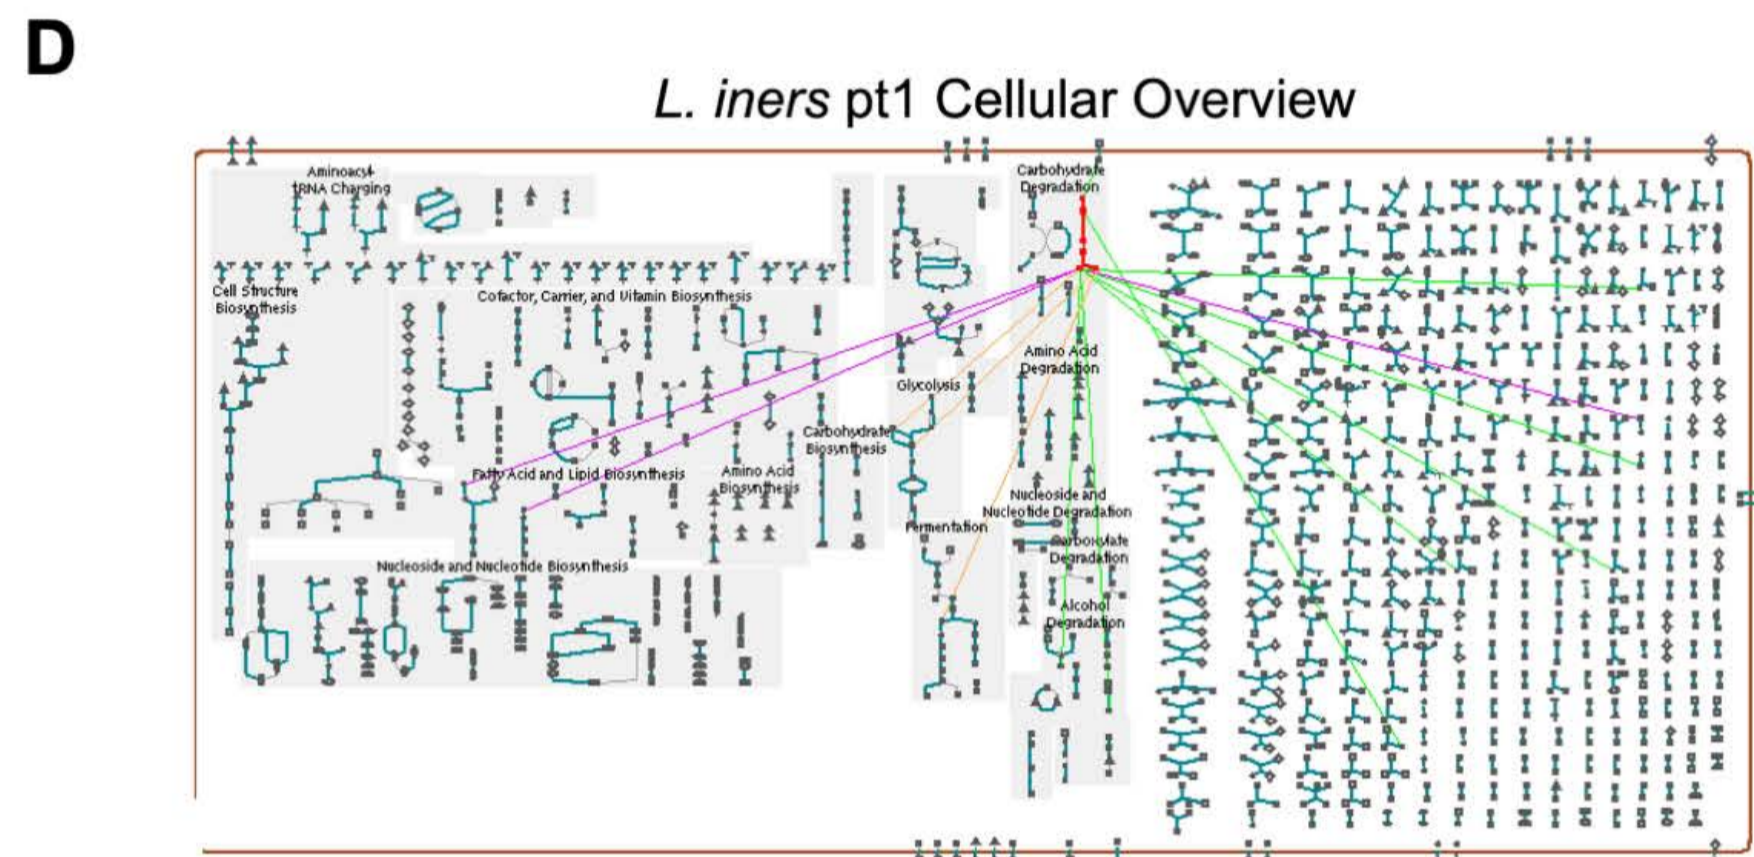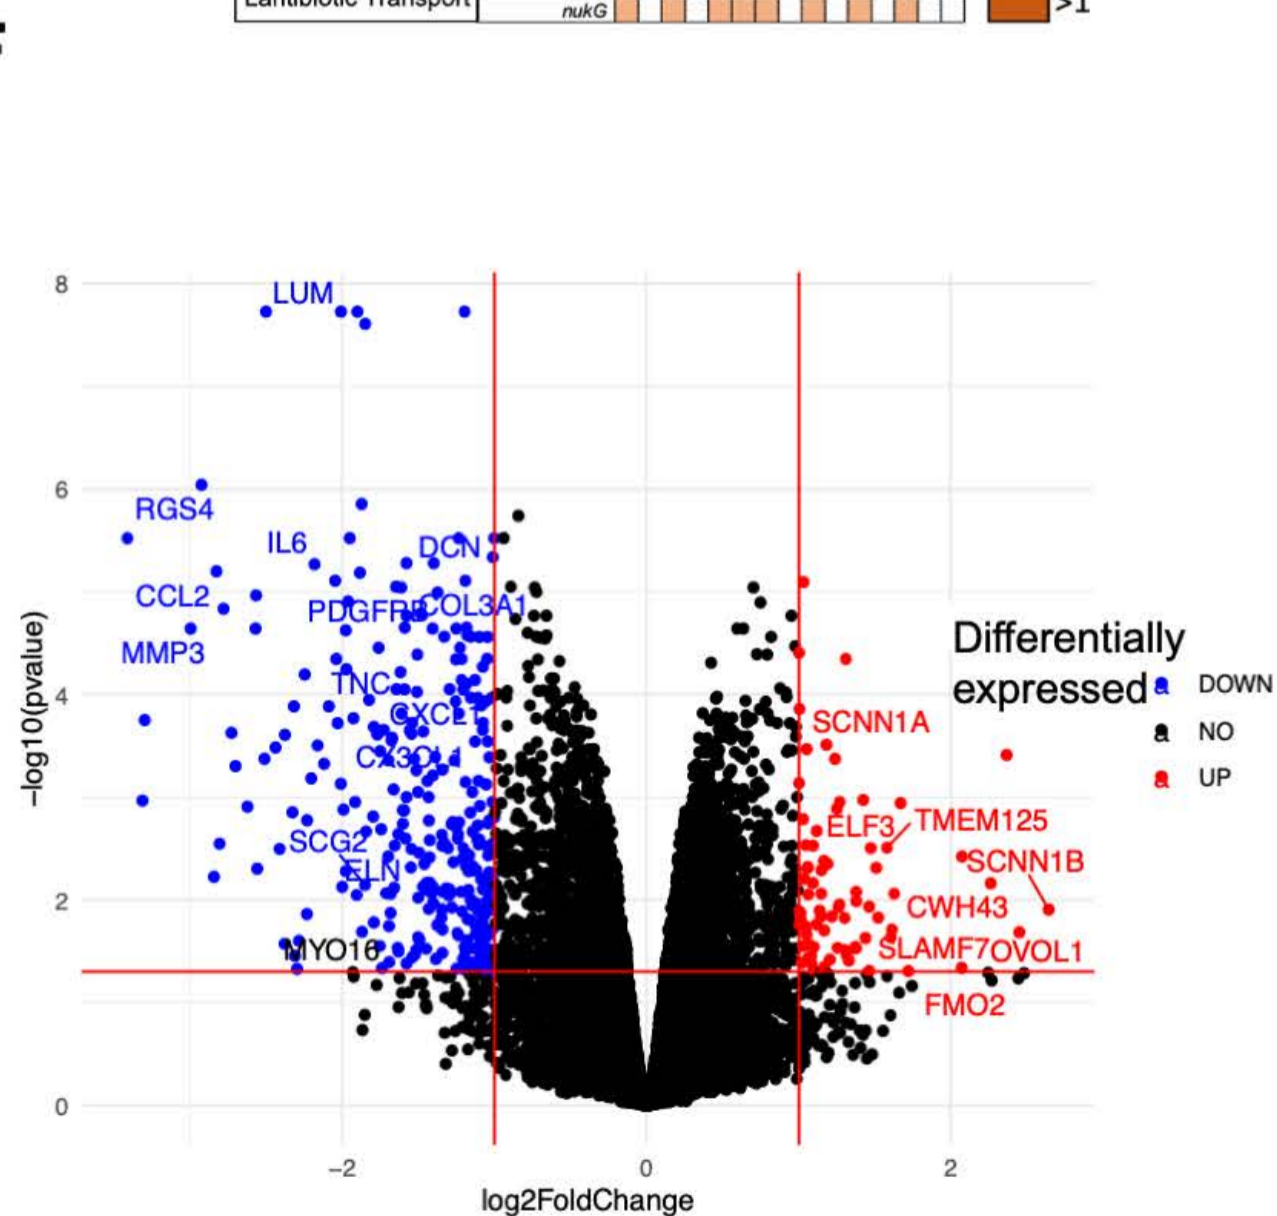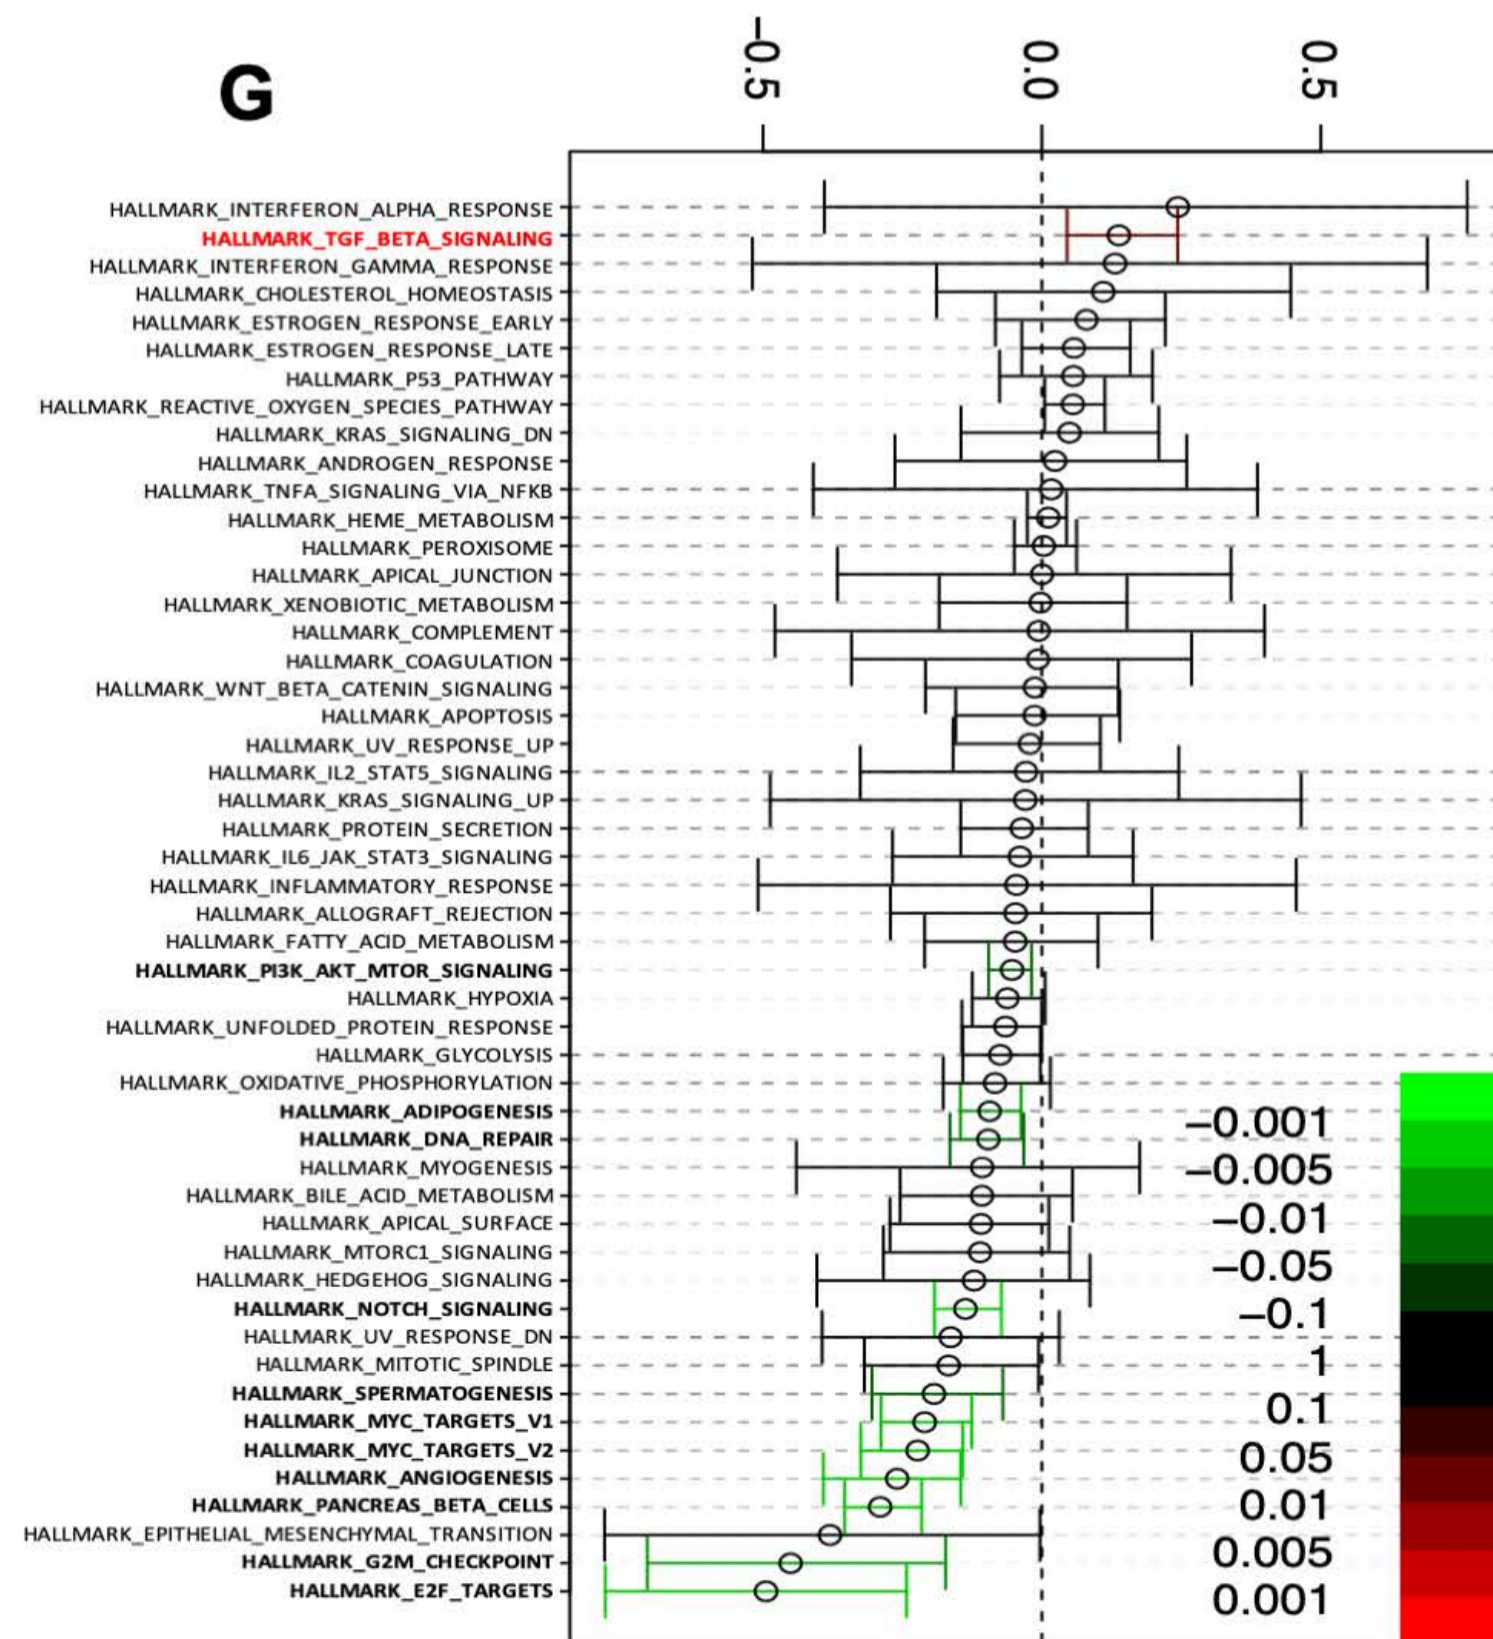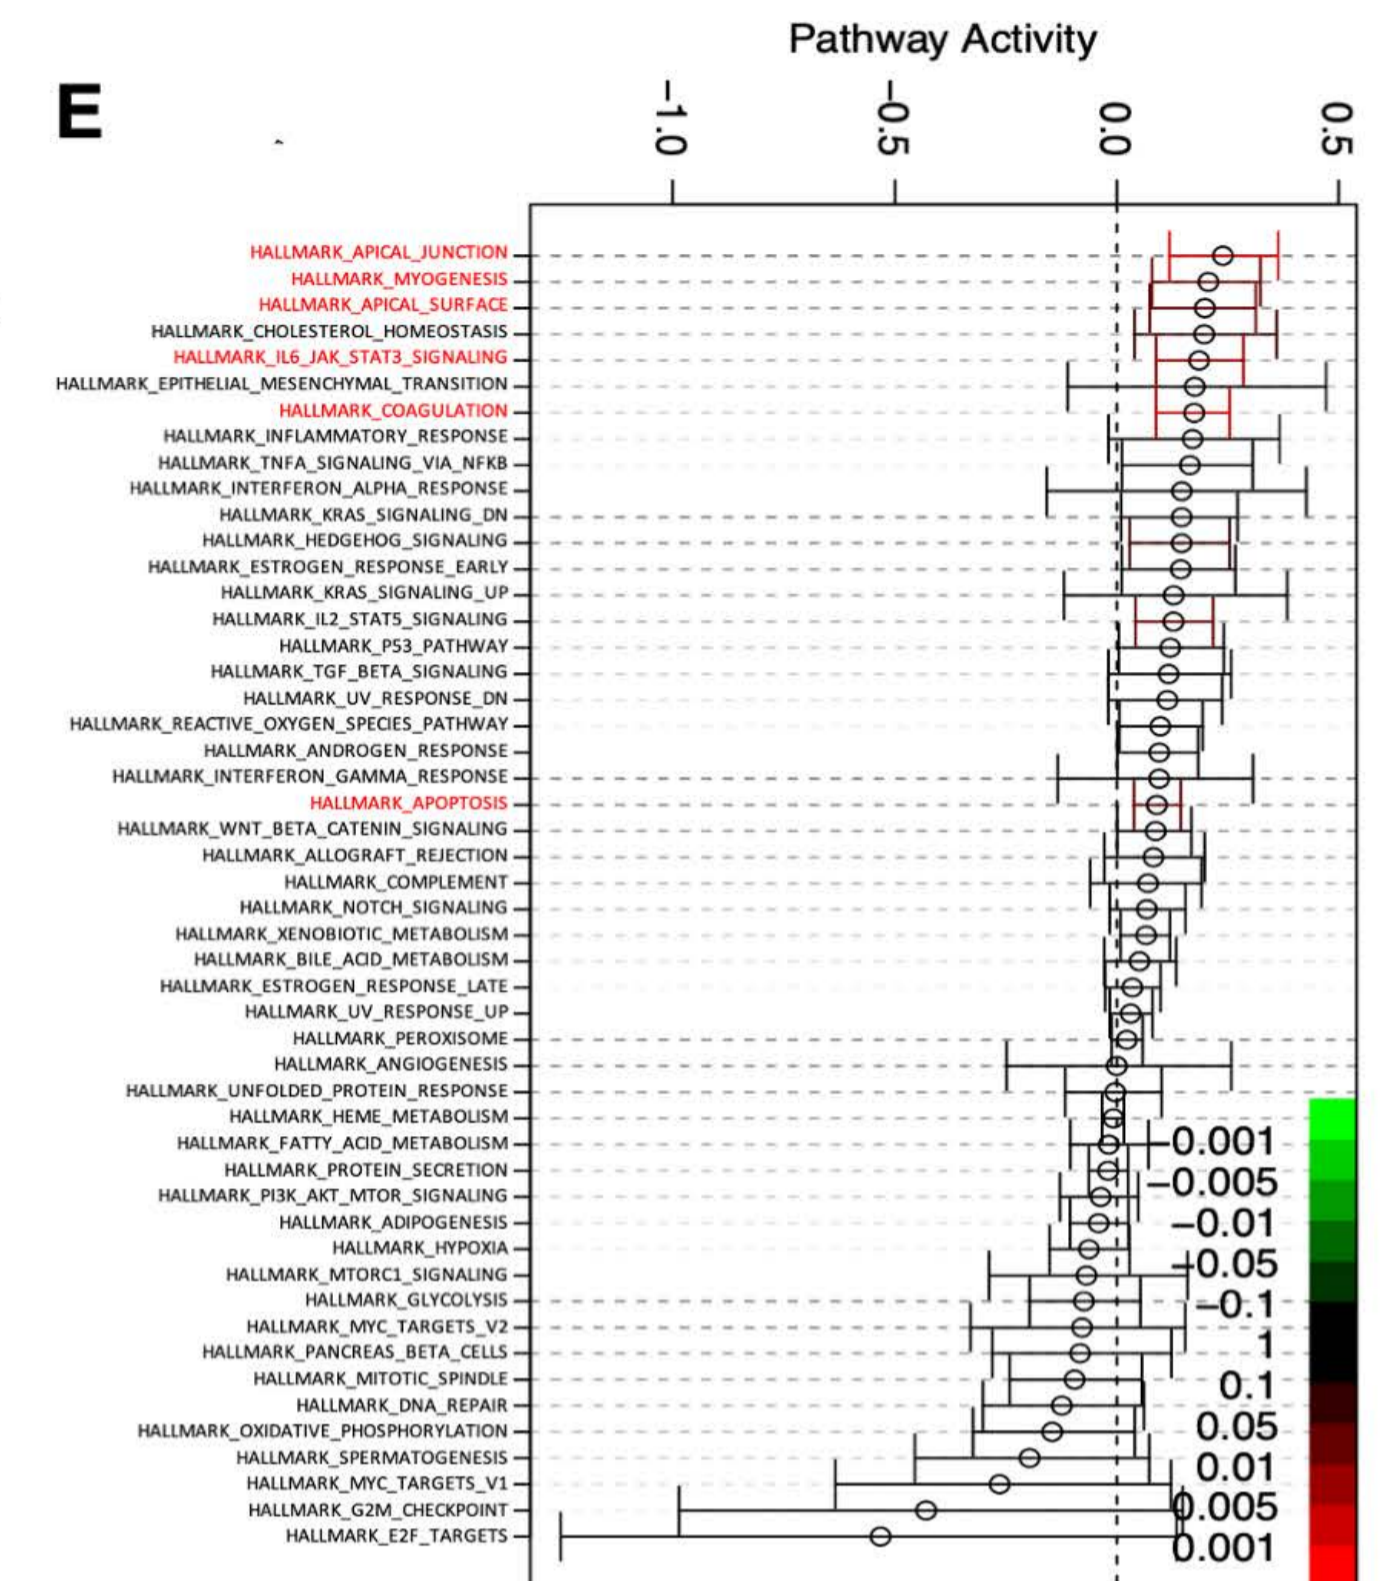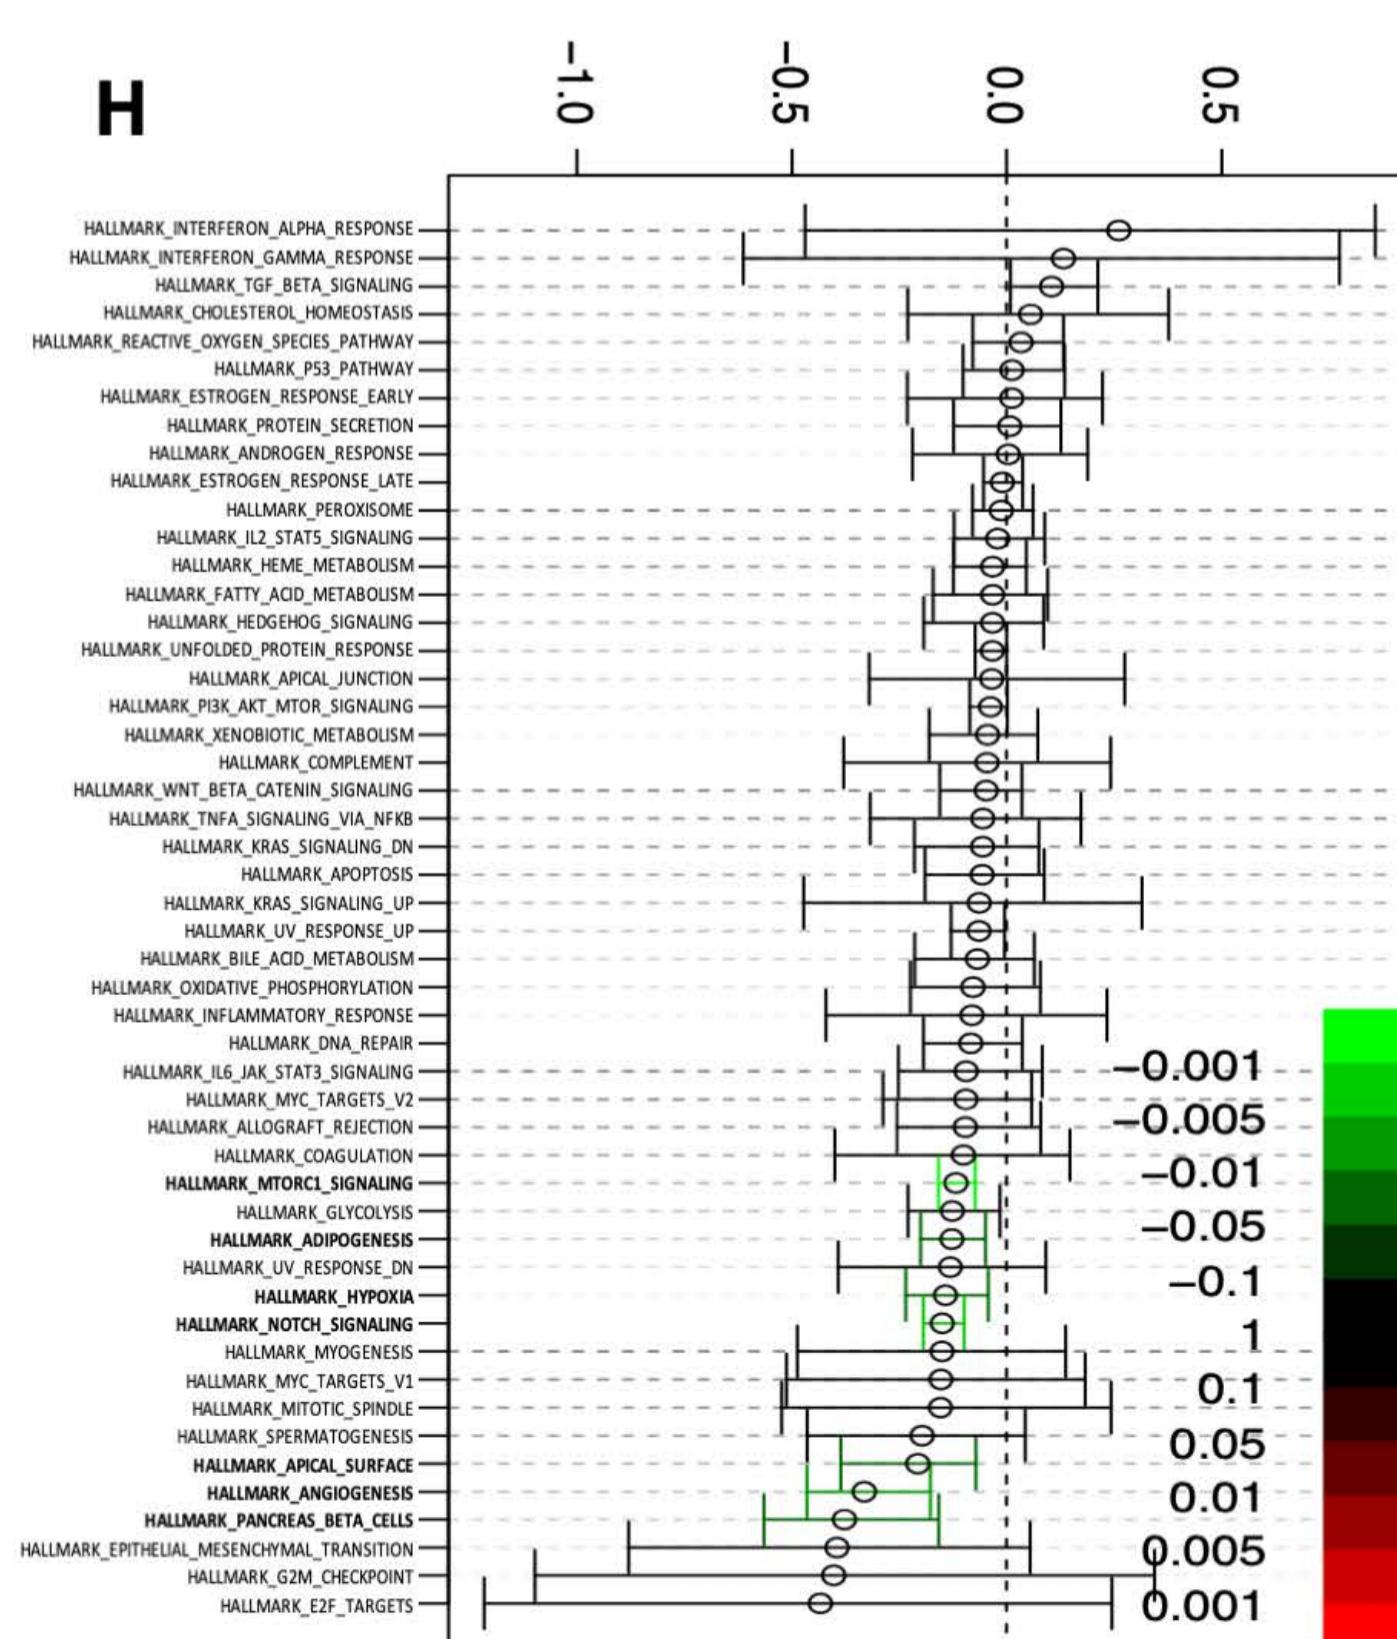

**Supplementary Figure 8. Batch effect control for 16S**, related to Figure 1.

- A. Alpha rarefaction curves for baseline, samples colored by batch.
- B. Association networks of all samples included in the study colored by batch.
- C. Association networks of all samples included in the study colored by institution.
- D. Association networks of all samples included in the study colored by clinical response.
- E. Association networks of all samples included in the study colored by sample ID.
- F. Association networks of all baseline samples included in the study colored by batch.
- G. Association networks of all baseline samples included in the study colored by clinical response.

**A**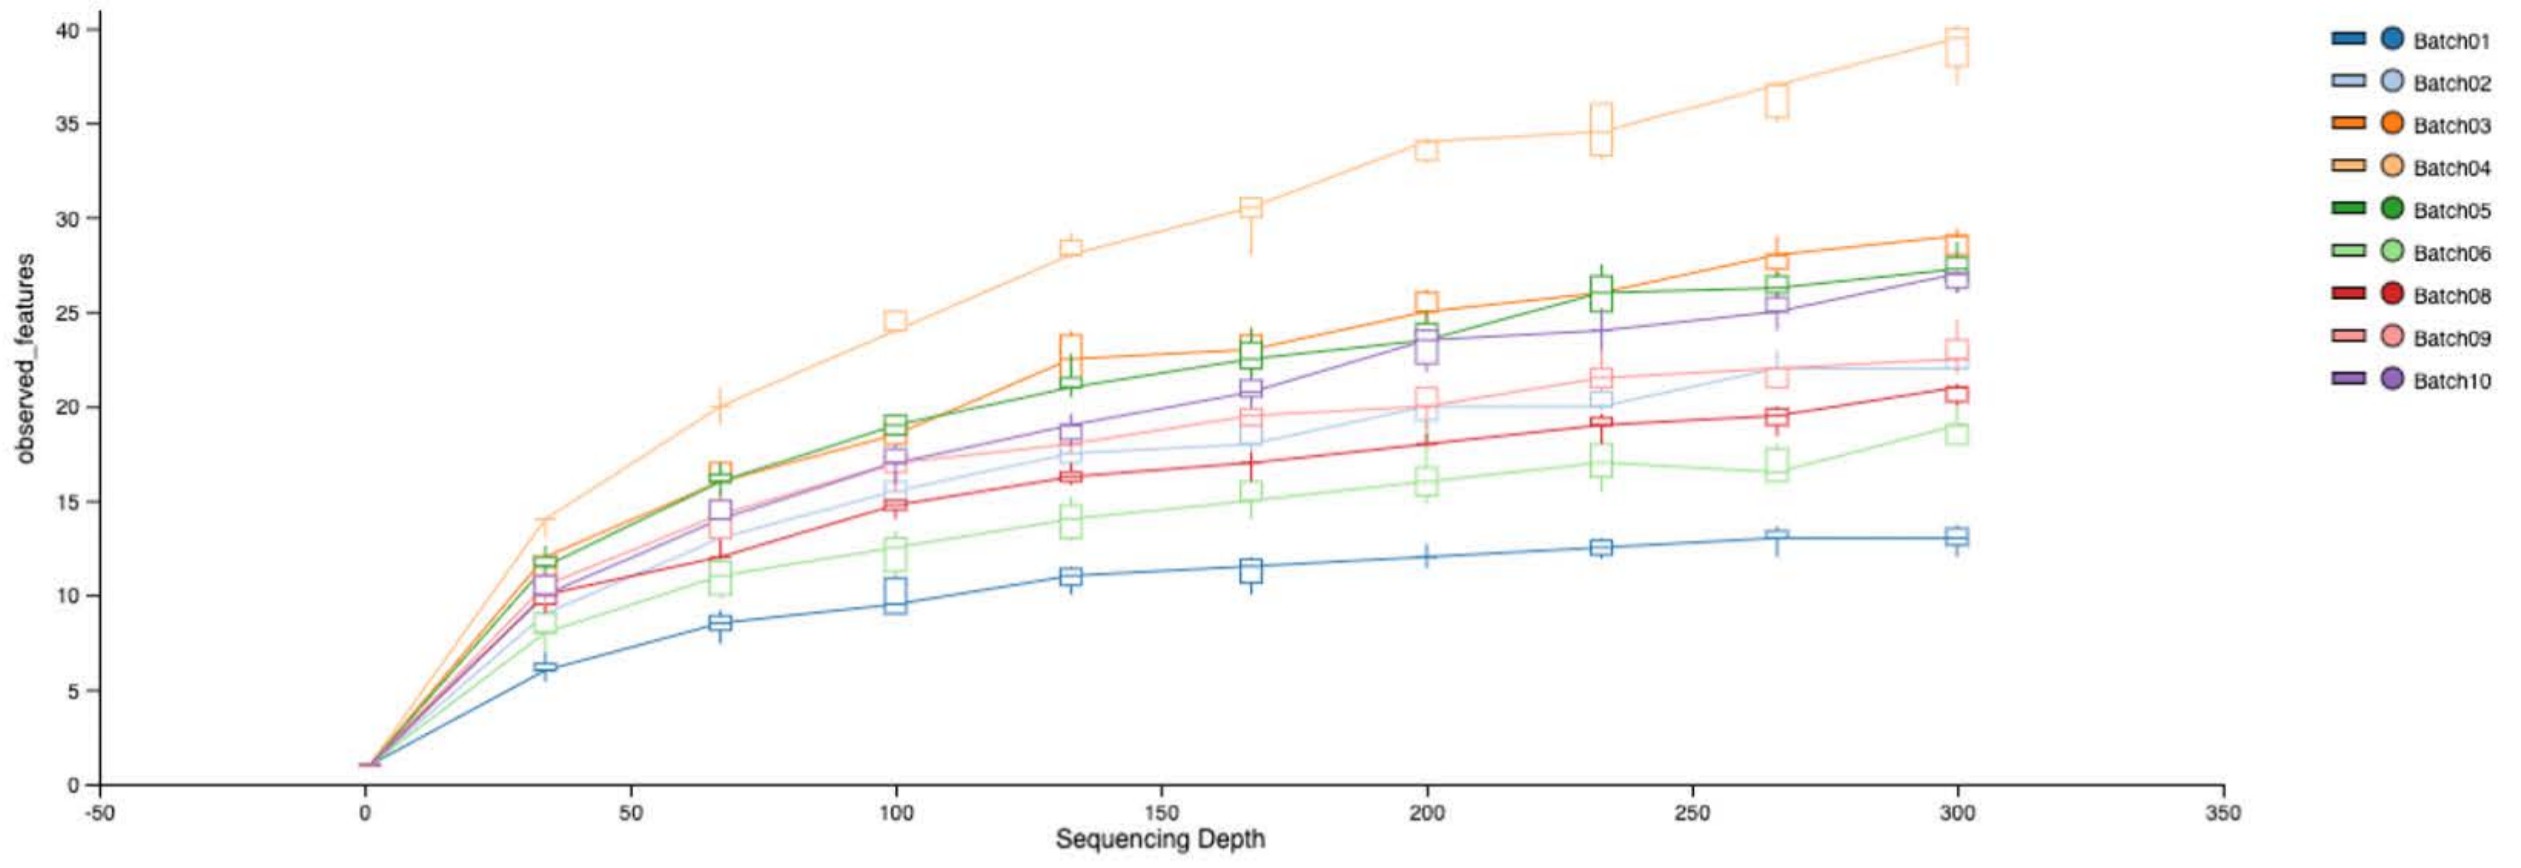**B**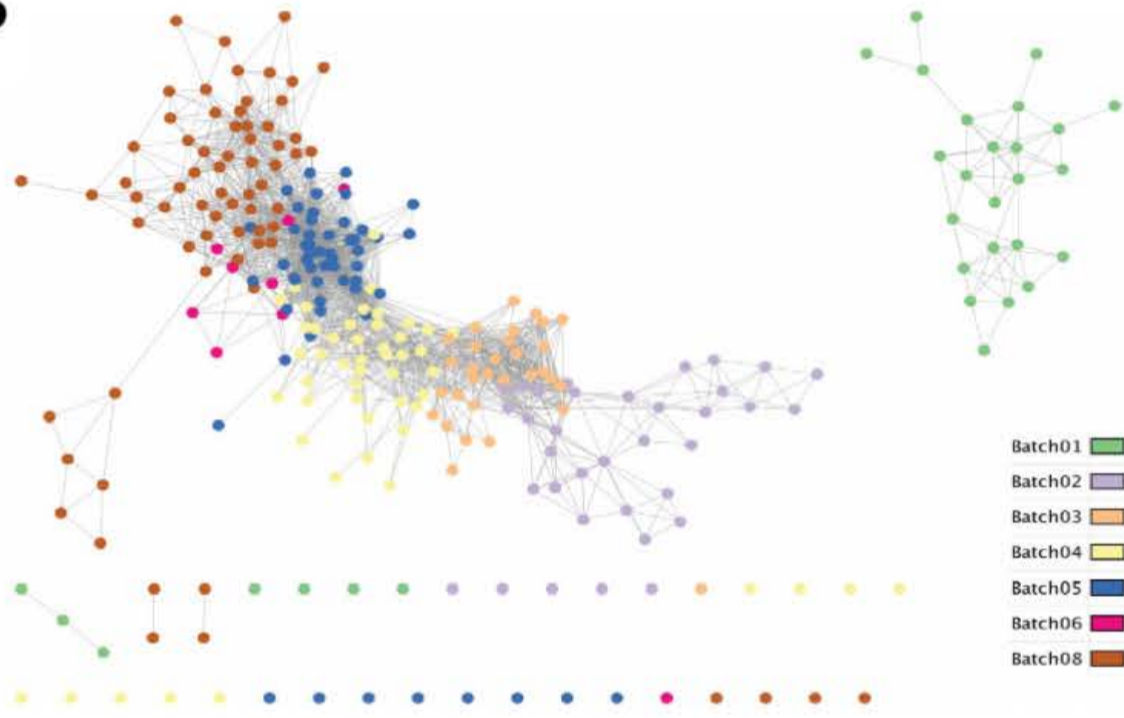**C**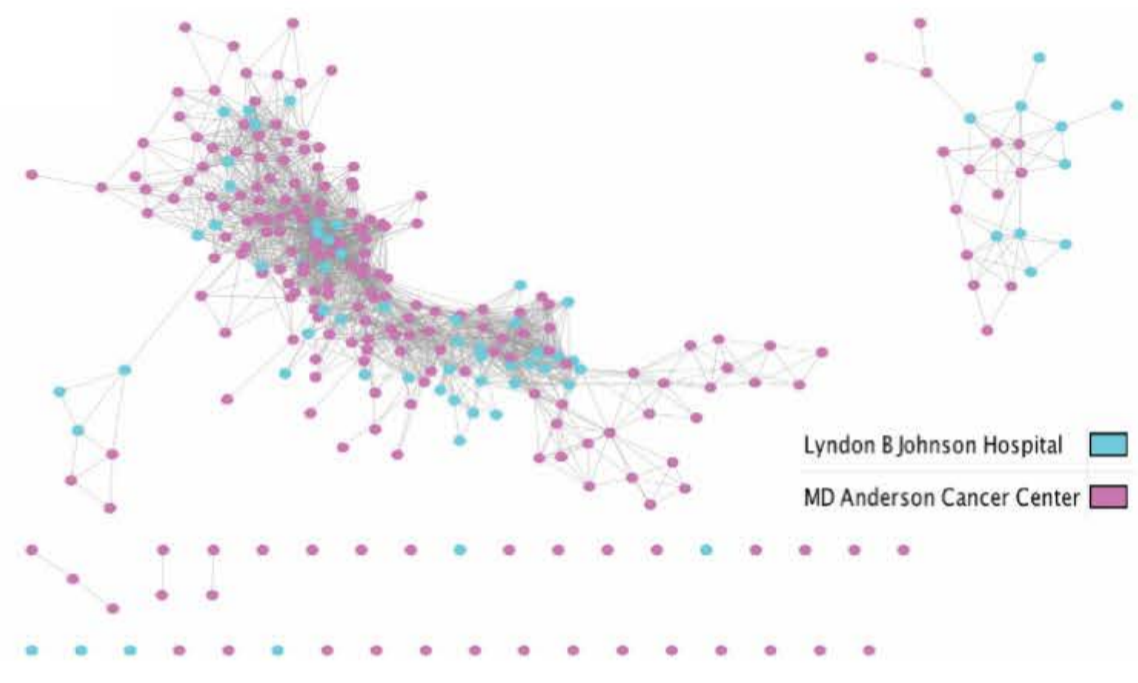**D**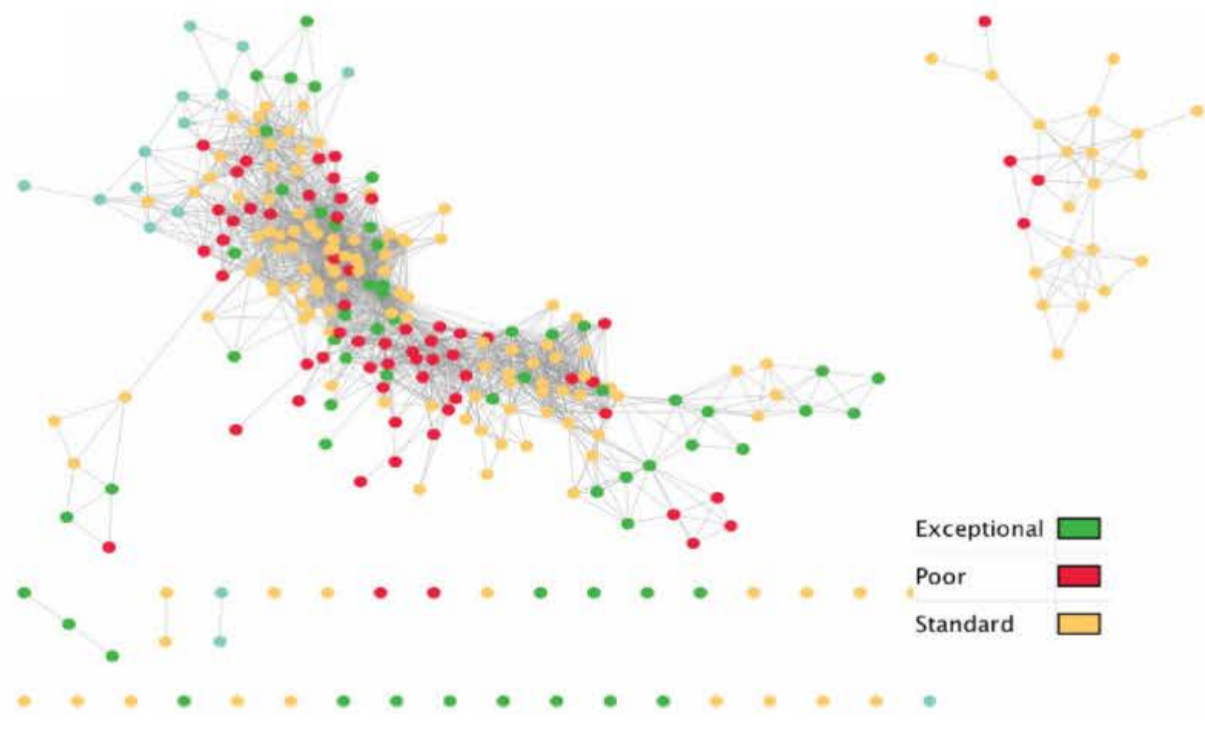**E**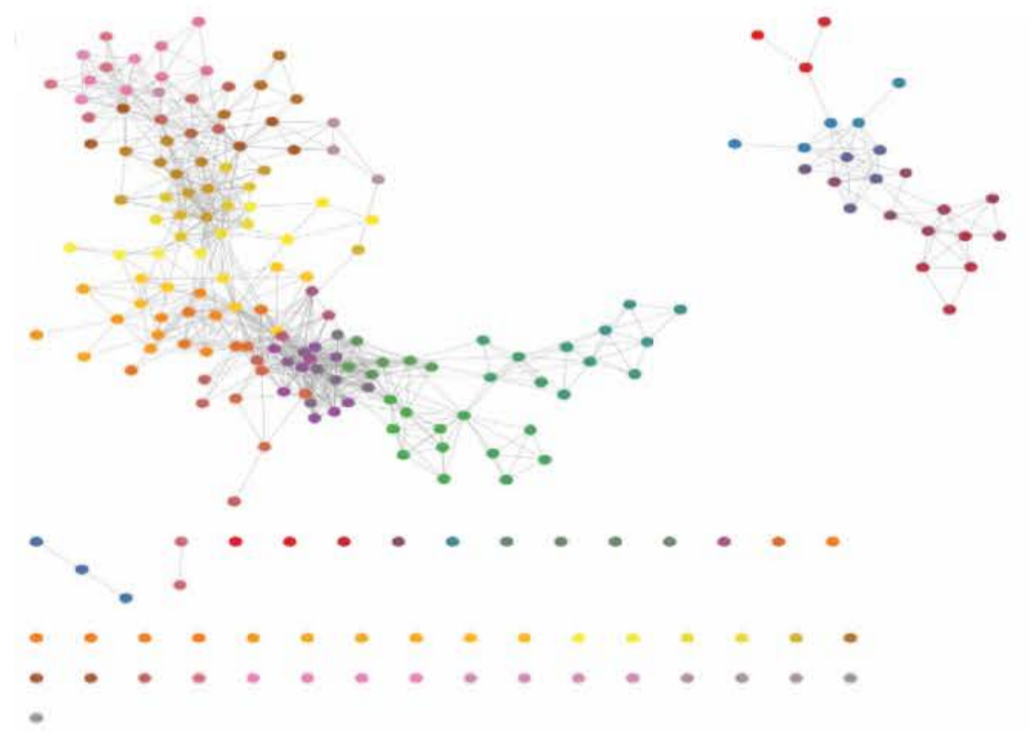**F**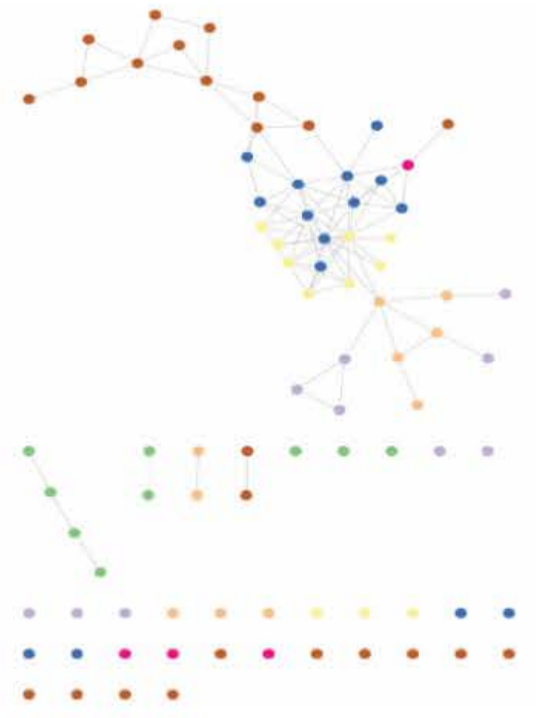**G**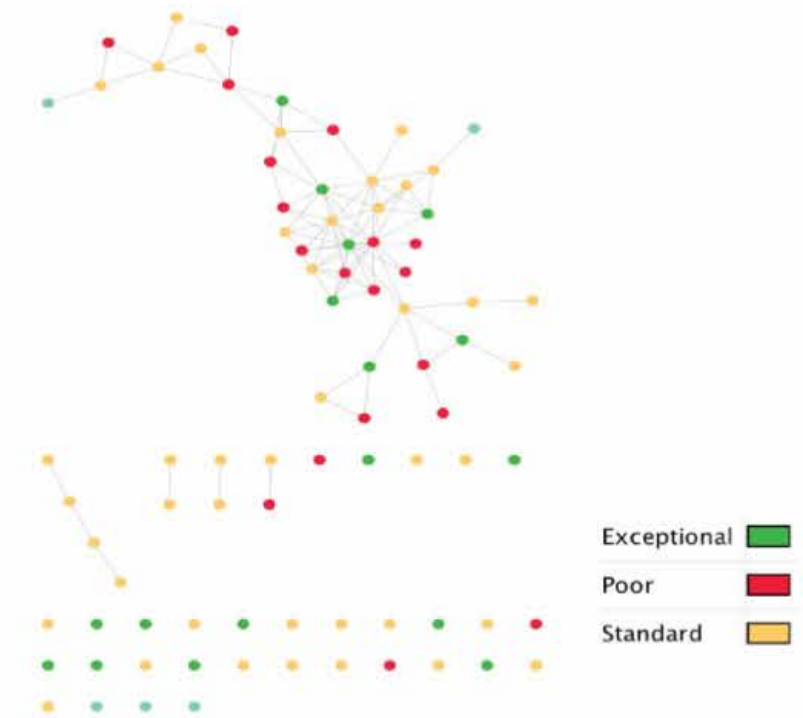

Supplement: NIHMS1935764-supplement-6.pdf [file NIHMS1935764-supplement-6.pdf]
